# Supplementary material for: Integrative Omics Analyses Reveal the Effects of Copper Ions on Salvianolic Acid Biosynthesis
Source: Front Plant Sci. 2021 Oct 21;12:746117. doi: 10.3389/fpls.2021.746117 (PMC8567050; doi:10.3389/fpls.2021.746117)
Supplement: Supplementary file 2 [file Table_1.XLSX]

## Sheet: Supplementary Table 1
Supplementary Table 1. Significantly changed metabolites in the roots of Salvia miltiorrhiza under the low copper ion treatment. The metabolites were identified based on their mass spectral data, retention time, and mass (MS) patterns of fragmentation.
Retention time (min)	[M-H]- m/z	Metabolite name MS1	MS/MS	Peak area (Low copper group)				Peak area (Blank group)				Ratio	P-value
				R1	R2	R3	R4	R1	R2	R3	R4
67.841	447.134	Isosakuranin		30059	213281	209261	192140	9393	3874	13883	16484	14.7761	0.0142721
5.823	281.088	2'-O-Methylinosine		424569	417732	408222	411252	32270	29946	33661	31125	13.0846	5.57124e-11
6.31	352.108	Parfumine		145043	139942	144819	146331	9997	13713	6141	14273	13.0572	2.05015e-09
5.77	127.004	Cyclohexanecarboxylate		68789	101565	85508	70806	7919	5699	5035	7254	12.6093	6.3285e-05
5.75	257.078	3-Methyluridine		131329	138024	133975	137828	8581	8249	19905	14975	10.4652	2.24802e-08
8.263	335.098	Carpachromene		123880	125599	114127	120876	12347	14356	13337	11874	9.3324	1.25255e-08
4.88	256.094	Benserazide		146770	154714	160931	140527	20146	19459	15156	15494	8.58219	1.20826e-07
11.989	251.114	Cimetidine		117566	132215	122894	125295	18775	8820	19294	15755	7.94921	1.35559e-07
14.924	479.142	Gossypin		1544630	1543660	1540949	1564368	191859	198185	205166	199004	7.79841	5.35227e-13
4.891	481.101	Silychristin		223149	198810	201969	189543	29933	28931	24652	24564	7.52656	3.14682e-07
8.961	315.107	6-Methoxyluteolin		77319	73057	72125	74001	13207	12267	2679	11604	7.45786	3.5707e-07
60.979	425.219	Villosinol		104017	103418	97975	98242	13453	14080	13018	14287	7.36081	3.08589e-09
31.574	715.13	Theaflavin Monogallates		374838	355285	334105	349375	11641	39256	57686	95374	6.93089	4.51719e-06
6.742	593.186	Poncirin		581011	620886	540205	566197	85604	84199	90493	83705	6.71015	1.11431e-07
5.801	511.138	picroside II		149681	132213	133327	144405	22375	20671	24106	21598	6.30565	1.62864e-07
5.8	266.09	Adenosine		69706	67741	71816	72969	11630	11604	11643	10238	6.25584	4.79471e-09
8.954	337.115	Griseofulvic Acid		153356	162695	149280	144301	25756	26847	24157	25190	5.97972	5.9238e-08
11.635	549.186	genipin 1-gentiobioside		137166	123242	116367	110156	4480	26759	27176	24216	5.89284	1.44647e-05
5.858	419.132	4-deoxyphloridzin		198043	200574	200432	200145	36275	35092	34282	34798	5.69036	5.00007e-13
8.258	161.045	3-Hydroxy-3-methylglutaric acid		748764	721561	711739	872025	153198	147838	153747	176630	4.83691	3.61305e-06
6.135	413.167	purpactin A		60656	70929	66424	71269	12891	15507	15840	13107	4.69575	9.05837e-07
15.877	387.129	Geniposide		126737	126459	110800	124258	21668	27820	26821	29637	4.60852	4.46854e-07
36.582	717.147	Salvianolic acid B	673.1580, 537.1018, 519.09228, 321.03974, 295.06024, 293.04469, 279.02823, 185.02363	1007108	973087	1006940	983392	292387	141071	293524	137881	4.59093	2.47052e-06
41.746	731.164	3'-Methyl Salvianolic acid B	515.0858, 507.1134, 353.0639	4531060	4592170	4533432	4630382	157190	1305657	1356704	1310723	4.42756	1.95537e-05
8.269	159.066	3-Methyladipic acid		221773	227874	217935	210963	51081	49564	48859	49205	4.42126	5.81208e-09
4.85	451.127	Aspalathin		1041975	1010099	1025040	1016939	254008	365186	93282	214375	4.41716	8.25554e-06
60.47	433.224	3-Deoxycaryoptinol		141985	133384	142499	137967	31769	31498	31461	33195	4.34507	4.4931e-09
18.464	597.126	Yunnaneic acid F/isomer	159.0435, 269.0824	118463	123052	124327	127921	27942	32366	30197	25542	4.25485	2.00346e-08
17.284	381.192	Histamine-trifluoromethyltoluide		300265	312278	304389	302141	76326	83430	70434	76211	3.97868	1.32157e-09
10.557	293.124	eupomatenoid 5		343418	355613	336950	363780	94298	97587	96997	96683	3.63042	1.25196e-08
4.135	313.114	8phiC9SPC		56187	54926	54628	57896	13792	18091	20838	9615	3.58761	4.26236e-06
8.297	182.046	4-Pyridoxate		195700	188559	187918	194859	46574	46936	62360	59183	3.56673	8.86651e-08
63.231	719.257	Azadirachtin		113835	109369	108385	115123	18338	18583	44119	44670	3.55351	4.46317e-05
5.821	297.12	picein		316890	328478	311966	315736	89653	96116	92960	91752	3.43626	1.55633e-09
4.502	100.04	1-AMINOCYCLOPROPANE-1-CARBOXYLATE		297343	293691	295978	300596	86336	90665	93239	93440	3.26553	9.86351e-11
16.252	375.131	(-)-Riboflavin		97858	99936	94954	103831	30465	29545	31273	32424	3.20579	3.79446e-08
62.029	475.234	Dihydrogedunic Acid, Methyl Ester		145483	142836	145357	142222	45223	45650	49559	48059	3.05531	4.46074e-10
22.597	537.104	Lithospermic acid	537.1018, 519.0923, 321.0397, 339.0502, 293.0447, 295.0602, 279.0282, 185.02	3398286	3341252	3450629	3325492	1148530	1132244	1132759	1131456	2.97375	3.05551e-10
26.995	161.024	Umbelliferone		417345	395508	411623	402564	241970	91725	28786	186234	2.96518	0.00133946
4.757	116.035	N-ACETYLGLYCINE		180824	185886	176551	167531	58034	62233	64220	55821	2.95784	1.65807e-07
22.597	339.052	Salvianolic acid D	321.1307, 295.3057, 253.0887, 235.0782, 204.0219, 159.9555	1099164	1123750	1119229	1146267	375881	385297	380691	378187	2.95279	3.73434e-10
5.829	285.074	kaempferol		104020	101457	103586	105187	39919	32714	32339	36217	2.93401	3.45299e-08
18.57	491.099	Triflusulfuron-methyl		768396	765383	748334	768531	262677	260151	255425	263400	2.92866	7.88803e-11
22.584	295.062	Flunixine		308175	299209	301997	307726	73725	113593	114255	115513	2.91812	1.29689e-06
10.751	431.156	osmanthuside H		263495	267551	265953	263754	92126	92969	98411	92778	2.81902	7.61383e-11
26.951	493.114	Salvianolic acid A	159.0447, 185.0294, 277.0519, 295.0602, 313.0710	1772461	1797730	1779962	1800651	638754	631401	658524	635116	2.78915	1.71247e-11
57.717	321.04	Chloramphenicol		253855	258910	270815	267680	119320	122531	117162	23220	2.75031	0.000479891
4.905	183.03	DL-3,4-Dihydroxymandelic acid		256890	250743	233596	254822	94760	91292	93715	89272	2.69904	1.15306e-07
11.098	417.083	Kaempferol 3-alpha-L-arabinopyranoside		150239	144569	140459	140889	49577	54284	53559	57829	2.6767	6.27193e-08
4.479	301.036	Taxifolin		103140	103411	137095	101413	40277	42713	38344	47424	2.63726	0.000232013
5.819	382.209	18-Aminoabieta-8,11,13-Triene Sulfate		183754	186951	186020	187835	73828	69466	71242	72876	2.59057	1.45406e-10
17.326	371.135	syringin		27216	25819	24580	27663	10705	9749	10962	9238	2.58961	1.01954e-06
11.76	153.023	Patulin	57.97527:147 67.49387:26 71.04987:786 80.96458:129 83.04785:19 96.96029:16929 97.96388:331 108.96032:129 135.52922:33 136.93434:189	116842	120642	152866	156070	34358	53178	59246	64780	2.58279	0.000491927
19.282	115.04	2-Oxovaleric acid		112820	110990	112621	111801	43066	45045	46628	45827	2.48237	3.2708e-10
4.316	311.099	3',4'-Dimethoxy-7-hydroxyflavanone		185095	180482	173088	185902	72195	75285	72859	74297	2.45919	3.27822e-08
8.256	197.046	Danshensu	179.034	379841	368576	373050	383438	164092	146812	167014	151447	2.39115	2.5726e-08
65.376	343.082	Usnic acid		656456	651979	645861	652339	276480	271406	272928	277445	2.37342	7.43377e-12
87.273	576.332	Phosphatidylcholine lyso 18:3		69576	73055	67224	74381	20254	40892	20565	38633	2.36186	0.000417732
8.089	339.129	8-Prenylnaringenin		343470	325936	319982	324742	140517	136828	140006	140262	2.35671	2.93063e-08
17.823	357.062	Przewalskinic acid A/isomer	57.03446,65.03983,71.01427,77.03958, 96.96087	12128195	12189695	12340792	12367442	5068028	5202779	5406404	5256192	2.342	3.1571e-10
68.521	438.263	1-Lauroyl-2-hydroxy-sn-glycero-3-phosphocholine		28069	31801	27650	25561	12602	11553	14338	10605	2.30317	4.40744e-05
16.965	404.113	E-3,4,5'-trihydroxy-3'-glucopyranosylstilbene		59406	87503	90718	78466	43644	35242	26815	33327	2.27359	0.00132618
17.821	267.066	7-Hydroxy-3'-methoxyflavone		115122	119535	118095	112061	49269	51009	53304	51895	2.26212	3.7288e-08
55.964	447.108	Astragalin		305754	300983	298461	304900	135802	132211	132942	140596	2.2345	8.58116e-10
5.84	237.089	Gly-Tyr		51548	58653	54062	56695	23886	25513	22937	26762	2.22969	2.43432e-06
5.834	263.077	Abscisic acid		83966	84801	84892	89653	36783	38753	37388	41538	2.22263	1.29482e-07
5.832	187.109	Gly-Ile		99640	93787	101629	96653	43091	41478	45956	45753	2.22211	1.89483e-07
19.66	147.045	trans-Cinnamic acid	147.0485, 129.0310, 103.0588	114992	115641	122082	122187	54170	50380	59762	51491	2.20063	5.02374e-07
19.177	429.141	bungeiside C		416370	407544	416663	409731	187316	182194	189195	193322	2.19448	6.43158e-10
68.844	773.536	Phosphatidylglyceride 16:0-20:2		106985	108978	109600	109699	50684	47250	53376	49680	2.16559	1.33536e-08
4.266	177.041	D-GLUCONATE		188627	156182	173391	203173	78589	87630	89376	78368	2.16004	9.18143e-05
17.822	203.035	PYROGALLIN		267066	276180	272639	328014	150269	128163	130409	125698	2.13997	5.75504e-05
4.732	323.098	Uridine Triphosphate Trisodium		255401	245895	251260	242231	120237	116908	113586	120137	2.11267	1.7258e-08
10.14	203.083	L-Tryptophane	55.55124:15 71.01423:70 74.02464:2345 78.95869:93 116.05106:2730 118.91955:107 142.06609:1034 145.82246:21 166.86574:272 185.07397:127 203.08327:5901	823610	840819	824810	832694	404245	400823	406787	392464	2.07062	1.81718e-10
10.139	116.051	Glycocyamine		215784	218247	224452	219134	105919	105985	112666	105515	2.04057	8.47596e-09
4.479	258.043	Glucosamine-6-phosphate		69266	75666	98757	69990	37413	36419	36175	45807	2.01316	0.00165427
17.822	313.072	Salvianolic acid F	269.0825, 159.0448	2243686	2161950	2206420	2336101	1113438	1118089	1034800	1192702	2.00675	4.58662e-07
73.496	611.201	Neohesperidin dihydrochalcone		469319	488730	459591	479402	226742	218108	272477	233643	1.99485	2.27342e-06
15.197	134.037	1-Hydroxybenzotriazole		165754	170648	154181	167780	82097	85020	91933	82402	1.92813	1.5916e-06
5.841	103.04	3-Hydroxybutyric acid		559702	537264	562663	565345	303001	296879	307550	298039	1.84573	2.58612e-08
4.611	128.035	Pyroglutamic acid		2264348	2281505	2278715	2299063	1187620	1177475	1327041	1343801	1.8117	4.69922e-07
21.477	167.035	Vanillic acid		124901	129267	125291	135358	78695	76290	52623	81137	1.78295	0.000197688
90.151	301.217	Abietic acid	131.07072:19 180.94724:26 207.48807:18 273.11978:80 300.35062:34 301.21973:21246 301.65753:125	240370	240222	205450	265192	128346	127656	160554	169074	1.62429	0.00138566
11.658	153.023	2,3-Dihydroxybenzoic acid		1099952	1079922	1054896	1071380	132174	825326	873118	826556	1.62058	0.059744
4.397	209.066	Citric acid		874259	852159	752678	677135	514075	490534	494682	497741	1.58046	0.000746974
26.335	359.078	Rosmarinic acid	59.11694:29 74.99749:117 90.04317:53 104.02834:23 115.01878:172 126.60217:34 135.04607:2380 148.22318:27 161.02603:119412 162.02945:11326 163.03165:1453 164.03291:139 176.03004:52 179.0369:7626 180.03825:228 197.04756:44216 198.05042:4371 199.05244:705 205.03568:76 213.51387:26 261.0686:33 359.08032:37232	32213616	32115680	41596802	41982556	23284184	23123052	23925176	23785232	1.57153	0.00292148
16.676	179.035	Caffeic acid	65.03883:140 77.03902:134 88.88771:129 91.05473:2035 105.03455:104 107.05034:5347 108.02142:791 109.05751:349 116.93875:195 118.03986:555 122.03664:77 134.03777:24376 135.04552:147874 135.64214:213 135.88544:110 136.04895:15442 136.37874:105 137.05174:1401 138.05188:118 147.52985:27 161.02284:487 173.62224:38	8124110	7879340	8794204	6799074	5008984	4959591	5089395	5106240	1.56697	0.000468469
4.385	149.009	(R,R)-Tartaric acid		1285801	1173196	1114279	1170375	756187	779026	769277	770856	1.54248	2.59546e-05
14.397	175.061	2-Isopropylmalic acid	69.07071:130 115.04201:1272 116.04592:276 128.61728:13 130.96501:181 132.98953:370 141.86862:92 148.98555:58 157.05106:602	1101865	1191971	967906	965192	692768	665782	699351	693516	1.53628	0.000572836
60.913	491.099	Isosalvianolic acid C	67.37856:56 122.03312:172 134.03734:97 140.72302:40 149.02612:722 155.57735:46 162.02675:434 179.03629:15945 180.04002:1674 184.48228:60 228.07298:20 254.05855:123 267.06799:2409 268.07071:496 281.01431:216 311.0585:2488 315.60016:14 319.03439:234 329.06717:129 332.25882:33 336.0029:106 374.2131:33 377.28699:66 458.1622:32	993713	967456	983785	956176	652251	661806	605240	664214	1.51001	8.94697e-07
3.935	565.049	Uridine??diphosphate??glucose		75132	70138	70114	65233	122041	105649	102858	94725	0.659851	0.00100615
4.269	193.036	2-Ketogluconic??acid		266471	254701	252016	254841	395578	393618	390677	384711	0.657062	4.67076e-08
32.953	193.051	Isoferulic acid	66.97696:63 125.43577:28 132.98825:159 134.03799:1597 135.04253:223 160.79225:125 162.84425:65 163.94478:36 192.95616:196	266471	254701	252016	254841	395578	393618	390677	384711	0.657062	4.67076e-08
73.06	271.228	16-Hydroxyhexadecanoic acid		269581	264486	267951	278797	423327	413547	416164	399970	0.653847	2.81221e-07
10.563	137.024	Protocatechuic aldehyde		177267	165073	178776	173629	208770	204190	201169	215572	0.651842	1.4102e-05
4.156	294.084	Mebendazole		154516	146631	150566	148078	229253	233925	234254	228794	0.647564	3.04948e-08
3.925	469.136	plumieride		19122	19991	22113	18624	30190	29896	30488	33231	0.644966	5.49833e-05
4.989	383.12	S-(5'-ADENOSYL)-L-HOMOCYSTEINE		38242	36465	25384	38404	55926	52821	53929	52088	0.644871	0.00103565
69.46	297.113	Enterolactone		103311	97811	100642	104876	157358	155179	163612	157186	0.642061	3.76582e-07
4.532	525.079	Bromadiolone		121572	110422	112062	109474	180545	178198	177177	173172	0.639593	9.84665e-07
14.023	182.059	O-Phosphocholine		67548	71558	71024	71664	108673	105809	112241	114419	0.638783	1.55444e-06
24.33	163.04	3-Coumaric acid	163.0370, 145.0280, 119.0470	321224	316241	313472	299215	488404	483000	497211	494613	0.636784	7.09099e-08
91.036	455.355	Oleanolic acid	96.44317:41 152.25113:46 156.40187:78 192.23994:52 220.43448:20 230.63818:141 258.03738:37 361.93759:19 386.24438:75 390.75598:127 392.30811:124 454.20435:212 455.35635:158356	5570816	5701405	6239362	6206202	9141438	9452845	9549165	9281256	0.633747	2.11326e-06
7.112	477.994	Glucoibarin		69105	66421	69433	72548	113136	106044	111957	107928	0.632041	1.23174e-06
16.584	539.143	maltotriose		68210	57414	54998	62858	100701	89686	105532	90571	0.629977	0.000327949
4.668	362.05	Guanosine 5'-monophosphate		118076	111917	118025	117005	192720	181590	193613	177151	0.62413	3.62535e-06
3.886	487.217	Vardenafil		12501	12425	12280	10154	17603	21735	18775	18551	0.617761	0.000445261
6.995	167.035	3,4-Dihydroxyphenylacetic acid		74434	71142	72987	70644	119299	117917	115313	119234	0.613035	3.18173e-08
4.248	341.11	D-(+)-Trehalose	57.0341:109 71.0137:2196 87.01011:704 89.02487:15892 90.02717:165 96.95669:251 99.0083:52 101.02399:3469 102.02785:81 105.02103:20 112.53388:63 113.02404:4842 114.92168:49 120.03972:381 129.02026:58 140.94035:18 145.03973:103 158.22185:41 161.48982:143 163.90747:52 179.0565:14457 180.05905:912 181.05917:290 182.00298:99 192.41725:17 205.94513:137 289.67642:35 298.008:133 309.04803:93 341.11041:41…	1332715	1333766	1303242	1319726	2130291	2186574	2170098	2144898	0.612782	1.81047e-09
71.646	209.118	Jasmonic acid		177695	173313	178177	172211	286931	278966	295156	293528	0.60749	1.24943e-07
4.241	537.169	Selaginpulvilin K		775876	735531	749434	732068	1259323	1237680	1222320	1215839	0.606446	3.62276e-08
62.017	735.251	Icariin		59057	56709	52781	54475	104869	89767	82472	93464	0.601832	0.000274052
82.84	295.229	13-HODE	50.52477:39 87.00854:177 119.14557:48 196.14371:30 243.50948:28 250.53149:148 290.0271:38 295.23032:13698 295.66299:142	182754	185324	176962	191854	316211	300904	315080	304192	0.596006	2.50084e-07
83.904	353.19	Vincamine		55979	74379	81449	37162	124003	126232	72091	96106	0.595005	0.0400334
72.908	295.229	12,13-EODE		6951	15864	23226	7102	23609	14194	25605	25973	0.594567	0.107617
16.42	249.125	Lacosamide		68305	62862	65800	62630	102662	117934	105989	110850	0.593453	1.66055e-05
81.683	299.259	(R)-2-hydroxystearic acid		129605	130204	124301	127304	223883	209137	214603	221182	0.588641	2.72341e-07
24.331	207.03	Fraxetin		220666	224802	213029	220965	371039	374050	396870	378454	0.578436	2.42322e-07
5.855	407.138	Amlodipine		62991	69255	69976	69668	119741	119992	122881	118206	0.565471	1.68912e-07
7.862	153.019	3,5-Dihydroxybenzoic acid/isomer		101450	100196	99831	101922	141935	131543	138800	144615	0.564069	3.96179e-06
17.91	579.174	Naringin		28775	29720	32266	30790	54033	55223	53085	53215	0.563895	2.02861e-07
69.713	307.192	albocycline		737177	730541	719877	741612	1308095	1318654	1352792	1266624	0.558352	6.76051e-08
4.782	407.006	Cholate		39539	39748	37587	43038	77102	67685	69016	73819	0.55598	1.26435e-05
16.268	305.07	Epigallocatechin		83312	86750	80272	88710	153082	151892	154202	156052	0.551087	4.76857e-08
19.759	563.141	Isoschaftoside		147402	140142	147190	139249	265740	253154	268688	258274	0.548816	1.27701e-07
5.069	135.031	Hypoxanthine		28898	27921	28043	28853	52476	50795	50255	54289	0.547193	2.79998e-07
88.395	599.322	Phosphatidylinositol lyso 18:0		132444	113384	128622	103881	274242	232375	196492	176762	0.543638	0.00423325
21.577	249.135	Citrinin		60494	69122	65311	69401	147351	119864	118795	106035	0.537203	0.000706784
24.33	137.024	Salicylic acid	64.17616:103 73.62056:52 93.03465:14382 93.44749:68 97.68873:41 111.00962:153 137.02524:3426	1838123	1772346	1728530	1766315	2592611	2558435	2607496	2587754	0.534708	1.88239e-07
18.779	393.178	Deguelin(-)		58018	56621	59791	60000	108204	108193	112985	109883	0.533687	2.5762e-08
66.526	315.161	Sodium Tetradecyl Sulfate		140682	150661	148871	162551	273596	277239	292862	286004	0.533562	7.5258e-07
3.916	385.174	eudesmin		127575	121231	125190	130011	228786	238558	245764	239107	0.5293	1.29964e-07
17.998	309.062	Sulfadimethoxine		52672	51548	55558	50320	99992	99855	99048	102523	0.52339	3.35076e-08
3.902	245.126	Santonin		74765	76518	72989	74738	148532	143967	142285	141065	0.519251	1.97872e-08
27.711	187.098	Azelaic acid	66.57545:17 75.02658:51 88.5035:51 125.09846:5350 126.09969:159 143.25111:53 144.86517:173 151.89304:119 169.08762:840 179.45731:80 187.09834:4426	1645946	1655315	1601731	1600726	2486589	2461807	2517393	2495773	0.508369	6.04601e-08
16.554	503.142	hypericin		174024	174143	180779	172033	357923	348870	365298	352104	0.492193	8.84805e-09
68.666	463.291	Pristimerin		96759	99875	93552	98761	200208	196029	197902	197873	0.491087	1.20348e-09
18.029	307.14	Phenylbutazone		55397	57854	56767	56875	114856	119206	118559	117477	0.48265	2.14894e-09
22.894	261.135	9-(2,3-dihydroxypropoxy)-9-oxononanoic acid		72290	70742	75194	72135	150481	145925	152530	153819	0.481723	1.70465e-08
4.122	264.109	THIAMINE		48286	51977	52648	47783	104833	105163	103787	103868	0.48053	1.23121e-08
4.155	639.003	Isorhamnetin-3,7-diglucoside		19913	20311	22761	20840	40282	45581	44066	46092	0.476222	4.04929e-06
5.344	347.043	Inosine-5-monophosphate		80227	77353	76781	71302	162408	160030	165197	156333	0.474656	6.23069e-08
6.018	215.073	Euparin		97268	95356	92531	87649	190204	192718	200279	206172	0.472279	2.81946e-07
15.949	103.04	3-HYDROXYBUTANOIC ACID		103746	112875	108335	105769	229763	232428	227669	228602	0.468963	2.46463e-09
7.202	587.183	Etoposide		73217	74295	77223	76815	161867	159023	158172	164608	0.468485	5.00446e-09
4.313	131.035	Glutaric acid		78096	97171	85606	94587	200646	211086	163950	202672	0.456682	8.59558e-05
86.055	437.251	No records		39054	18842	37983	34765	67361	67703	74432	89718	0.436624	0.000968717
3.893	383.194	4MeC13SPC		19967	20604	21310	18205	46600	50687	53981	54994	0.388273	4.20016e-06
87.6	469.225	8-Hydroxycarapinic Acid		24360	20179	20361	24041	36047	74215	60448	65379	0.376727	0.00428607
37.717	312.125	feruloyltyramine		276101	165902	142935	174348	540069	520216	543413	540776	0.354066	2.53983e-05
8.263	315.109	Pinoquercetin		311093	350262	284695	299511	898851	895861	943998	916281	0.340784	4.525e-08
4.377	245.045	2,2`,4,4`-Tetrahydroxybenzophenone		1840	2720	804	1181	4973	6969	5137	2951	0.32676	0.0106459
3.902	316.116	Piplartine		63956	68982	65654	62864	202434	203204	209452	196019	0.322344	8.07392e-09
4.488	231.099	(+)-Dihydrokavain		42270	39940	44201	41272	133975	135020	147813	136557	0.303024	1.11389e-07
3.901	226.083	2'-Deoxycytidine		31092	28851	27682	27289	101553	97187	101892	100611	0.286395	3.35883e-09
4.125	102.056	Aminobutyric acid		65226	92616	79081	89732	344135	314949	309103	341574	0.2494	5.05273e-07
32.779	457.185	epigallocatechin gallate		177065	78209	68730	21068	548102	549923	77317	547037	0.200346	0.0304716
4.15	171.007	rac-Glycerol 3-phosphoate		11492	23076	10011	11310	51631	66521	119299	56994	0.189811	0.00932771
32.781	421.209	Oct-1-en-3-yl Ara (1-6)Glu		43222	45231	334052	40511	1044006	1030684	141926	1041221	0.142124	0.0251443
4.141	259.023	Glucose-6-phosphate		16025	11369	11715	16795	157733	183862	159996	164408	0.0839401	2.73914e-07

## Sheet: Supplementary Table 2
Supplementary Table 2. Significantly changed genes in roots of Salvia miltiorrhiza under the low copper ion treatment.. Gene expression level was calculated using fragments per klobase of transcript per million fragments mapped (FPKM) value.
Gene ID	FPKM value (blank group)			FPKM value (low copper treatment group)			P-value	log2FC	GO_annotation	KEGG_annotation	KEGG_pathway_annotation	KOG_class_annotation	Swiss-Prot_annotation
	R1	R2	R3	R1	R2	R3
scaffold12201.1	2.55994	1.69554	3.14056	43.5764	40.6631	37.3652	2.83606e-24	4.07117	Cellular Component: mitochondrial respiratory chain complex I (GO:0005747);; Molecular Function: NADH dehydrogenase (ubiquinone) activity (GO:0008137);; Biological Process: oxidation-reduction process (GO:0055114);;	K03963|6.09468e-53|sind:105156151|K03963 NADH dehydrogenase (ubiquinone) 1 beta subcomplex subunit 7 | (RefSeq) NADH dehydrogenase [ubiquinone] 1 beta subcomplex subunit 7	Oxidative phosphorylation (ko00190)	Energy production and conversion	NADH dehydrogenase [ubiquinone] 1 beta subcomplex subunit 7 OS=Arabidopsis thaliana OX=3702 GN=At2g02050 PE=3 SV=1
scaffold7038.7	15.5694	1.63628	12.1206	0	0	0	8.79729e-19	-11.6527	Biological Process: photosystem II assembly (GO:0010207);;	--	--	--	Protein THYLAKOID FORMATION 1, chloroplastic OS=Arabidopsis thaliana OX=3702 GN=THF1 PE=1 SV=1
newGene_14895	0	0	0	3.09768	3.38941	2.71493	1.77941e-16	9.69153	--	--	--	--	--
newGene_7113	0	0	0	1.07082	1.12641	0.711842	2.89674e-12	8.75075	--	--	--	Signal transduction mechanisms	Putative disease resistance protein At1g58400 OS=Arabidopsis thaliana OX=3702 GN=At1g58400 PE=3 SV=1
scaffold651.28	14.5216	48.09	37.5954	4.09643	0.966026	1.45057	1.1378e-11	-3.92624	Molecular Function: magnesium ion binding (GO:0000287);; Molecular Function: pyruvate kinase activity (GO:0004743);; Molecular Function: ATP binding (GO:0005524);; Cellular Component: cytoplasm (GO:0005737);; Biological Process: glycolytic process (GO:0006096);; Molecular Function: kinase activity (GO:0016301);; Molecular Function: potassium ion binding (GO:0030955);;	K00873|0|spen:107008234|K00873 pyruvate kinase [EC:2.7.1.40] | (RefSeq) pyruvate kinase, cytosolic isozyme	Glycolysis / Gluconeogenesis (ko00010);; Purine metabolism (ko00230);; Pyruvate metabolism (ko00620);; Carbon metabolism (ko01200);; Biosynthesis of amino acids (ko01230)	Carbohydrate transport and metabolism	Pyruvate kinase, cytosolic isozyme OS=Nicotiana tabacum OX=4097 PE=2 SV=1
scaffold11173.1	225.325	398.498	1.73677	0.779502	1.62244	2.52502	1.19583e-08	-6.99715	Molecular Function: adenosylhomocysteinase activity (GO:0004013);; Cellular Component: cytosol (GO:0005829);; Biological Process: one-carbon metabolic process (GO:0006730);; Biological Process: S-adenosylmethionine cycle (GO:0033353);;	K01251|1.32398e-117|sind:105180104|K01251 adenosylhomocysteinase [EC:3.3.1.1] | (RefSeq) adenosylhomocysteinase	Cysteine and methionine metabolism (ko00270)	Coenzyme transport and metabolism	Adenosylhomocysteinase OS=Nicotiana tabacum OX=4097 GN=SAHH PE=2 SV=1
scaffold1040.9	17.4843	10.9029	9.20398	2.88119	2.08674	2.51455	1.22169e-08	-2.23811	Cellular Component: integral component of membrane (GO:0016021);; Biological Process: transmembrane transport (GO:0055085);;	--	--	--	Metal-nicotianamine transporter YSL3 OS=Arabidopsis thaliana OX=3702 GN=YSL3 PE=2 SV=1
C214037.2	27.9109	20.3003	25.8505	3.98363	2.8401	7.50933	3.45469e-08	-2.30998	Molecular Function: superoxide dismutase activity (GO:0004784);; Molecular Function: copper ion binding (GO:0005507);; Cellular Component: mitochondrion (GO:0005739);; Cellular Component: plasma membrane (GO:0005886);; Cellular Component: chloroplast stroma (GO:0009570);; Cellular Component: thylakoid (GO:0009579);; Cellular Component: chloroplast envelope (GO:0009941);; Biological Process: remov…	K04564|1.15758e-128|sind:105160768|K04564 superoxide dismutase, Fe-Mn family [EC:1.15.1.1] | (RefSeq) superoxide dismutase [Fe], chloroplastic	Peroxisome (ko04146)	Inorganic ion transport and metabolism	Superoxide dismutase [Fe] 2, chloroplastic OS=Arabidopsis thaliana OX=3702 GN=FSD2 PE=1 SV=1
scaffold4004.3	6.40455	6.04145	3.22667	0.297068	0.265237	0.69428	5.01085e-08	-3.54419	--	K14686|3.00393e-37|sot:102606340|K14686 solute carrier family 31 (copper transporter), member 1 | (RefSeq) copper transporter 6-like	--	Inorganic ion transport and metabolism	Copper transporter 6 OS=Arabidopsis thaliana OX=3702 GN=COPT6 PE=2 SV=1
scaffold9670.3	0.436312	0.024069	0.30436	2.8047	0.783847	6.48952	6.60863e-08	4.58412	Molecular Function: copper ion binding (GO:0005507);; Biological Process: lignin biosynthetic process (GO:0009809);; Molecular Function: oxidoreductase activity, oxidizing metal ions (GO:0016722);; Biological Process: lignin catabolic process (GO:0046274);; Cellular Component: apoplast (GO:0048046);; Molecular Function: hydroquinone:oxygen oxidoreductase activity (GO:0052716);; Biological Process…	K05909|0|sind:105158919|K05909 laccase [EC:1.10.3.2] | (RefSeq) laccase-14-like	--	Secondary metabolites biosynthesis, transport and catabolism	Laccase 20
scaffold4128.1	2.72304	0.734244	3.05155	28.3627	10.9082	18.1837	2.84616e-07	3.17574	Molecular Function: electron carrier activity (GO:0009055);; Cellular Component: anchored component of plasma membrane (GO:0046658);;	--	--	--	Basic blue protein OS=Cucumis sativus OX=3659 PE=1 SV=1
C209891.1	2.11595	3.73607	1.38582	26.2824	19.624	15.8738	7.13218e-07	2.30619	Biological Process: ubiquinone biosynthetic process (GO:0006744);; Cellular Component: extrinsic component of mitochondrial inner membrane (GO:0031314);;	K18586|4.73907e-61|sind:105179813|K18586 ubiquinone biosynthesis protein COQ4 | (RefSeq) ubiquinone biosynthesis protein COQ4 homolog, mitochondrial	--	Coenzyme transport and metabolism	Ubiquinone biosynthesis protein COQ4 homolog, mitochondrial OS=Arabidopsis thaliana OX=3702 GN=At2g03690 PE=2 SV=1
newGene_11466	8.0819	5.29646	3.18868	0.640467	0.344002	0.860969	7.76394e-07	-3.05418	Cellular Component: integral component of membrane (GO:0016021);; Biological Process: transmembrane transport (GO:0055085);;	--	--	--	Metal-nicotianamine transporter YSL3 OS=Arabidopsis thaliana OX=3702 GN=YSL3 PE=2 SV=1
scaffold3548.4	3.87342	1.01683	2.4975	21.5743	12.0576	14.6206	9.0594e-07	2.7276	Molecular Function: electron carrier activity (GO:0009055);; Cellular Component: anchored component of plasma membrane (GO:0046658);;	--	--	--	Basic blue protein OS=Cucumis sativus OX=3659 PE=1 SV=1
scaffold2061.8	43.4182	47.033	56.1262	17.6703	17.4914	18.1877	3.48497e-06	-1.40937	Molecular Function: phosphoadenylyl-sulfate reductase (thioredoxin) activity (GO:0004604);; Cellular Component: cell (GO:0005623);; Biological Process: cysteine biosynthetic process (GO:0019344);; Biological Process: sulfate reduction (GO:0019419);; Biological Process: cell redox homeostasis (GO:0045454);;	K05907|0|sind:105167991|K05907 adenylyl-sulfate reductase (glutathione) [EC:1.8.4.9] | (RefSeq) 5'-adenylylsulfate reductase 3, chloroplastic-like	Sulfur metabolism (ko00920)	Amino acid transport and metabolism	5&apos;-adenylylsulfate reductase 1, chloroplastic OS=Arabidopsis thaliana OX=3702 GN=APR1 PE=1 SV=2
newGene_22287	3.26522	3.49376	3.51908	0.750034	0.337749	1.00385	1.88311e-05	-2.46355	--	--	--	--	--
C213909.1	314.536	267.913	234.634	72.0663	88.4629	136.427	2.11046e-05	-1.44423	Cellular Component: integral component of membrane (GO:0016021);; Biological Process: metal ion transport (GO:0030001);; Molecular Function: 2-alkenal reductase [NAD(P)] activity (GO:0032440);; Molecular Function: metal ion transmembrane transporter activity (GO:0046873);; Biological Process: transmembrane transport (GO:0055085);; Biological Process: oxidation-reduction process (GO:0055114);;	K14709|4.7232e-171|sind:105170429|K14709 solute carrier family 39 (zinc transporter), member 1/2/3 | (RefSeq) zinc transporter 2	--	Inorganic ion transport and metabolism	Zinc transporter 1 OS=Oryza sativa subsp. japonica OX=39947 GN=ZIP1 PE=1 SV=1
newGene_9684	14.3914	58.5274	34.3452	115.167	127.999	144.302	2.16935e-05	1.88944	Molecular Function: DNA binding (GO:0003677);; Molecular Function: zinc ion binding (GO:0008270);;	--	--	General function prediction only	Zinc finger A20 and AN1 domain-containing stress-associated protein 5 OS=Arabidopsis thaliana OX=3702 GN=SAP5 PE=2 SV=1
scaffold1723.6	0.112775	0.058531	0.201959	1.90935	0.861232	0.601054	2.3508e-05	3.13402	Molecular Function: DNA binding (GO:0003677);;	K09422|0|sind:105172205|K09422 myb proto-oncogene protein, plant | (RefSeq) transcription factor GAMYB-like	--	Transcription	Transcription factor MYB33 OS=Arabidopsis thaliana OX=3702 GN=MYB33 PE=2 SV=1
scaffold3068.14	195.035	125.049	157.822	64.3679	58.9287	65.8834	2.67774e-05	-1.30695	Cellular Component: cytoplasm (GO:0005737);; Biological Process: metal ion transport (GO:0030001);; Molecular Function: transition metal ion binding (GO:0046914);; Biological Process: cellular transition metal ion homeostasis (GO:0046916);;	K07213|1.11387e-24|gra:105779205|K07213 copper chaperone | (RefSeq) copper transport protein CCH-like	--	Inorganic ion transport and metabolism	Copper transport protein CCH OS=Arabidopsis thaliana OX=3702 GN=CCH PE=1 SV=1
scaffold4651.5	71.3995	96.4255	97.7748	214.801	217.057	189.597	3.6786e-05	1.27543	Molecular Function: magnesium ion binding (GO:0000287);; Molecular Function: sesquiterpene synthase activity (GO:0010334);; Biological Process: farnesyl diphosphate catabolic process (GO:0045339);; Biological Process: (-)-exo-alpha-bergamotene biosynthetic process (GO:1901940);;	K12742|1.49886e-174|sind:105175395|K12742 isoprene synthase [EC:4.2.3.27] | (RefSeq) trans-alpha-bergamotene synthase-like	--	--	Exo-alpha-bergamotene synthase OS=Lavandula angustifolia OX=39329 PE=1 SV=1
newGene_9953	1.61329	1.30641	1.11039	16.5971	1.34282	18.4975	3.73113e-05	3.15521	Cellular Component: extracellular region (GO:0005576);; Molecular Function: manganese ion binding (GO:0030145);; Molecular Function: nutrient reservoir activity (GO:0045735);;	--	--	--	Germin-like protein subfamily 1 member 13 OS=Arabidopsis thaliana OX=3702 GN=GLP6 PE=2 SV=2
scaffold12346.12	20.712	11.331	30.4816	9.83007	5.56977	6.22101	5.35279e-05	-1.59225	Cellular Component: membrane (GO:0016020);; Molecular Function: oxidoreductase activity (GO:0016491);;	--	--	Inorganic ion transport and metabolism;; Secondary metabolites biosynthesis, transport and catabolism	Ferric reduction oxidase 2 OS=Arabidopsis thaliana OX=3702 GN=FRO2 PE=1 SV=2
scaffold1649.8	17.4412	28.5292	11.0395	61.8817	48.9074	87.3239	6.73294e-05	1.79485	--	--	--	--	F-box protein At2g02240 OS=Arabidopsis thaliana OX=3702 GN=At2g02240 PE=2 SV=1
newGene_17757	0.191293	0.196313	0.16773	0.976828	1.00342	1.25279	7.06024e-05	2.47607	--	--	--	--	F-box/FBD/LRR-repeat protein At2g26030 OS=Arabidopsis thaliana OX=3702 GN=At2g26030 PE=2 SV=2
scaffold11114.2	22.5064	0.623918	17.2138	0.813218	1.578	1.30519	0.000112681	-3.36978	Molecular Function: hydroxymethylglutaryl-CoA reductase (NADPH) activity (GO:0004420);; Cellular Component: endoplasmic reticulum membrane (GO:0005789);; Biological Process: isoprenoid biosynthetic process (GO:0008299);; Biological Process: coenzyme A metabolic process (GO:0015936);; Cellular Component: integral component of membrane (GO:0016021);; Molecular Function: NADP binding (GO:0050661);; …	K00021|4.01386e-33|sind:105172989|K00021 hydroxymethylglutaryl-CoA reductase (NADPH) [EC:1.1.1.34] | (RefSeq) 3-hydroxy-3-methylglutaryl-coenzyme A reductase	Terpenoid backbone biosynthesis (ko00900)	Lipid transport and metabolism	3-hydroxy-3-methylglutaryl-coenzyme A reductase 1 OS=Gossypium hirsutum OX=3635 GN=HMG1 PE=3 SV=1
scaffold1445.11	266.142	99.627	241.803	74.2133	74.0433	65.5832	0.000118853	-1.40582	Molecular Function: NADPH dehydrogenase activity (GO:0003959);; Cellular Component: peroxisome (GO:0005777);; Biological Process: jasmonic acid biosynthetic process (GO:0009695);; Molecular Function: FMN binding (GO:0010181);; Molecular Function: 12-oxophytodienoate reductase activity (GO:0016629);; Biological Process: oxylipin biosynthetic process (GO:0031408);; Biological Process: oxidation-red…	K05894|0|sind:105173673|K05894 12-oxophytodienoic acid reductase [EC:1.3.1.42] | (RefSeq) 12-oxophytodienoate reductase 3	alpha-Linolenic acid metabolism (ko00592)	Energy production and conversion;; General function prediction only	12-oxophytodienoate reductase 3 OS=Solanum lycopersicum OX=4081 GN=OPR3 PE=1 SV=1
scaffold1358.12	35.6998	7.3344	27.2356	8.67186	5.47527	3.43908	0.000124757	-1.9572	Molecular Function: transporter activity (GO:0005215);; Biological Process: oligopeptide transport (GO:0006857);; Cellular Component: integral component of membrane (GO:0016021);;	K14638|8.22926e-176|sind:105161585|K14638 solute carrier family 15 (peptide/histidine transporter), member 3/4 | (RefSeq) protein NRT1/ PTR FAMILY 5.6-like	--	Amino acid transport and metabolism	Protein NRT1/ PTR FAMILY 5.6 OS=Arabidopsis thaliana OX=3702 GN=NPF5.6 PE=2 SV=1
scaffold10508.1	1.5054	0.914456	1.09849	1.73548	0.625609	93.1799	0.000126284	4.77725	--	--	--	--	--
newGene_17727	19.2648	20.0118	11.5435	47.7853	43.2366	51.8137	0.000126707	1.50019	Molecular Function: lyase activity (GO:0016829);;	K01673|7.21349e-20|sind:105177130|K01673 carbonic anhydrase [EC:4.2.1.1] | (RefSeq) carbonic anhydrase, chloroplastic-like	Nitrogen metabolism (ko00910)	--	Carbonic anhydrase, chloroplastic OS=Spinacia oleracea OX=3562 PE=1 SV=2
newGene_8813	1.67777	1.52842	3.01732	0.465137	0.457004	0.174194	0.00015909	-2.41148	--	--	--	--	IQ domain-containing protein IQM3 OS=Arabidopsis thaliana OX=3702 GN=IQM3 PE=2 SV=1
newGene_20746	3.3848	3.55324	1.10718	11.177	4.05127	33.4594	0.00017447	2.58378	Cellular Component: extracellular region (GO:0005576);; Molecular Function: manganese ion binding (GO:0030145);; Molecular Function: nutrient reservoir activity (GO:0045735);;	--	--	--	Germin-like protein subfamily 1 member 13 OS=Arabidopsis thaliana OX=3702 GN=GLP6 PE=2 SV=2
scaffold9599.1	0.740578	0.492448	0.421007	3.00857	4.15715	1.31991	0.000187315	2.36057	Molecular Function: kinase activity (GO:0016301);;	--	--	Signal transduction mechanisms	Probable receptor-like protein kinase At4g10390 OS=Arabidopsis thaliana OX=3702 GN=At4g10390 PE=2 SV=1
scaffold3077.4	1.05544	4.77967	6.12632	0.730334	0.131906	0.073924	0.000192638	-3.60286	Molecular Function: actin binding (GO:0003779);; Cellular Component: integral component of membrane (GO:0016021);; Biological Process: transmembrane transport (GO:0055085);;	--	--	Energy production and conversion	Mitochondrial adenine nucleotide transporter ADNT1 OS=Arabidopsis thaliana OX=3702 GN=ADNT1 PE=1 SV=1
scaffold1269.27	25.0962	47.6462	11.5231	121.097	60.2122	108.516	0.000198646	1.77206	Molecular Function: serine-type endopeptidase activity (GO:0004252);; Biological Process: proteolysis (GO:0006508);; Molecular Function: serine-type exopeptidase activity (GO:0070008);;	K01322|2.0226e-144|sind:105178116|K01322 prolyl oligopeptidase [EC:3.4.21.26] | (RefSeq) prolyl endopeptidase-like	--	Posttranslational modification, protein turnover, chaperones	--
C221331.4	42.7173	16.5278	34.5141	10.5555	15.127	11.2888	0.000361943	-1.34659	Molecular Function: monooxygenase activity (GO:0004497);; Molecular Function: iron ion binding (GO:0005506);; Biological Process: positive regulation of flower development (GO:0009911);; Biological Process: response to UV-B (GO:0010224);; Biological Process: brassinosteroid homeostasis (GO:0010268);; Biological Process: pollen exine formation (GO:0010584);; Cellular Component: integral component …	K09588|0|sind:105160880|K09588 cytochrome P450 family 90 subfamily A polypeptide 1 [EC:1.14.-.-] | (RefSeq) cytochrome P450 90A1	Brassinosteroid biosynthesis (ko00905)	Secondary metabolites biosynthesis, transport and catabolism;; Lipid transport and metabolism	Cytochrome P450 90A1 OS=Arabidopsis thaliana OX=3702 GN=CYP90A1 PE=2 SV=1
scaffold5107.10	2.21739	5.02276	1.55754	0	0	0.431927	0.000411602	-4.33681	Molecular Function: translation initiation factor activity (GO:0003743);; Biological Process: translational initiation (GO:0006413);;	K15027|0|sind:105174789|K15027 translation initiation factor 2D | (RefSeq) eukaryotic translation initiation factor 2D	--	Translation, ribosomal structure and biogenesis	--
newGene_9552	10.1692	13.478	20.6746	304.508	10.5495	28.8659	0.000478653	2.98386	Molecular Function: binding (GO:0005488);;	--	--	--	Agglutinin-2 OS=Cladrastis kentukea OX=38412 PE=1 SV=1
scaffold10790.5	9.37903	3.72763	14.2963	3.47362	1.54361	1.71076	0.000504998	-1.96407	--	--	--	--	LOB domain-containing protein 38 OS=Arabidopsis thaliana OX=3702 GN=LBD38 PE=1 SV=1
scaffold4460.17	579.891	703.694	612.923	301.615	294.78	315.636	0.000523809	-1.02934	Molecular Function: methionine adenosyltransferase activity (GO:0004478);; Molecular Function: ATP binding (GO:0005524);; Cellular Component: cytosol (GO:0005829);; Biological Process: S-adenosylmethionine biosynthetic process (GO:0006556);; Biological Process: one-carbon metabolic process (GO:0006730);; Molecular Function: metal ion binding (GO:0046872);;	K00789|0|spen:107002303|K00789 S-adenosylmethionine synthetase [EC:2.5.1.6] | (RefSeq) S-adenosylmethionine synthase 3-like	Cysteine and methionine metabolism (ko00270);; Biosynthesis of amino acids (ko01230)	Coenzyme transport and metabolism	S-adenosylmethionine synthase 3 OS=Catharanthus roseus OX=4058 GN=SAMS3 PE=1 SV=1
scaffold8147.1	2.21641	0.392446	75.7979	0.944988	0	1.40952	0.000601694	-5.21332	--	--	--	--	--
scaffold7426.5	43.1864	14.4908	64.2036	188.156	95.5861	80.7543	0.000611314	1.6332	Molecular Function: electron carrier activity (GO:0009055);; Cellular Component: integral component of membrane (GO:0016021);; Cellular Component: anchored component of plasma membrane (GO:0046658);;	--	--	--	Blue copper protein OS=Pisum sativum OX=3888 PE=2 SV=1
scaffold861.6	3.72941	7.16417	1.00087	0.861104	0.971782	0.952197	0.000660116	-2.10103	--	--	--	--	Protein JASON OS=Arabidopsis thaliana OX=3702 GN=JASON PE=2 SV=1
newGene_3171	6.00635	1.64378	2.70266	18.6243	3.94265	24.4086	0.000732673	2.17341	Cellular Component: extracellular region (GO:0005576);; Molecular Function: manganese ion binding (GO:0030145);; Molecular Function: nutrient reservoir activity (GO:0045735);;	--	--	--	Germin-like protein subfamily 1 member 11 OS=Arabidopsis thaliana OX=3702 GN=At5g38940 PE=2 SV=1
scaffold6289.6	21.607	27.5186	15.5129	44.7359	51.0901	43.5863	0.000757536	1.12102	Molecular Function: nucleotide binding (GO:0000166);; Molecular Function: protein serine/threonine kinase activity (GO:0004674);; Cellular Component: plasma membrane (GO:0005886);; Biological Process: cell surface receptor signaling pathway (GO:0007166);; Biological Process: phosphorylation (GO:0016310);;	--	--	Signal transduction mechanisms	Wall-associated receptor kinase-like 14 OS=Arabidopsis thaliana OX=3702 GN=WAKL14 PE=2 SV=2
scaffold1866.9	4.60452	3.69543	3.15488	15.8199	7.49472	10.0347	0.000949528	1.33633	Molecular Function: binding (GO:0005488);;	--	--	Signal transduction mechanisms;; Intracellular trafficking, secretion, and vesicular transport	Putative clathrin assembly protein At4g25940 OS=Arabidopsis thaliana OX=3702 GN=At4g25940 PE=2 SV=1
scaffold3771.2	27.2447	46.3501	21.0424	61.2297	62.5031	96.1096	0.0010824	1.249	Molecular Function: protein serine/threonine kinase activity (GO:0004674);; Molecular Function: ATP binding (GO:0005524);; Biological Process: protein phosphorylation (GO:0006468);;	K04424|7.61417e-140|sind:105156126|K04424 sterile alpha motif and leucine zipper containing kinase AZK [EC:2.7.11.25] | (RefSeq) serine/threonine-protein kinase EDR1	--	Signal transduction mechanisms	Probable serine/threonine-protein kinase SIS8 OS=Arabidopsis thaliana OX=3702 GN=SIS8 PE=1 SV=1
scaffold11932.12	60.7931	41.6095	71.6231	33.7454	17.5977	24.0786	0.00108341	-1.17062	Cellular Component: integral component of membrane (GO:0016021);;	--	--	--	Uncharacterized protein At5g65660 OS=Arabidopsis thaliana OX=3702 GN=At5g65660 PE=2 SV=1
newGene_21368	2.96039	4.09359	2.67267	0.824911	1.15024	0.916615	0.00112421	-1.72409	Cellular Component: nucleus (GO:0005634);; Cellular Component: cytosol (GO:0005829);; Biological Process: Golgi organization (GO:0007030);; Biological Process: nuclear envelope reassembly (GO:0031468);; Molecular Function: ubiquitin binding (GO:0043130);; Biological Process: proteasome-mediated ubiquitin-dependent protein catabolic process (GO:0043161);; Biological Process: membrane fusion (GO:00…	K14012|4.00886e-85|egr:104435092|K14012 UBX domain-containing protein 1 | (RefSeq) plant UBX domain-containing protein 4	Protein processing in endoplasmic reticulum (ko04141)	Nuclear structure	Plant UBX domain-containing protein 4 OS=Arabidopsis thaliana OX=3702 GN=PUX4 PE=1 SV=1
scaffold937.1	3.2811	2.63286	2.40463	0.939095	1.51808	0.226768	0.00127662	-2.14187	--	--	--	--	--
scaffold3929.1	0.32159	0.265298	0.129076	0.953922	0.681485	1.74534	0.00129612	2.19324	Cellular Component: integral component of membrane (GO:0016021);; Biological Process: transmembrane transport (GO:0055085);;	K02575|0|sind:105156629|K02575 MFS transporter, NNP family, nitrate/nitrite transporter | (RefSeq) high affinity nitrate transporter 2.5	Nitrogen metabolism (ko00910)	--	High affinity nitrate transporter 2.5 OS=Arabidopsis thaliana OX=3702 GN=NRT2.5 PE=1 SV=1
scaffold5915.1	0.029064	0.075202	0.010922	0.282975	0.180517	0.18622	0.00132877	2.38077	Molecular Function: catalase activity (GO:0004096);; Biological Process: response to oxidative stress (GO:0006979);; Cellular Component: integral component of membrane (GO:0016021);; Molecular Function: heme binding (GO:0020037);; Molecular Function: phosphopantetheine binding (GO:0031177);; Biological Process: oxidation-reduction process (GO:0055114);; Biological Process: cellular oxidant detoxi…	--	--	Lipid transport and metabolism	4-coumarate--CoA ligase-like 9 OS=Oryza sativa subsp. japonica OX=39947 GN=4CLL9 PE=2 SV=2
newGene_10239	41.3681	32.9467	36.3389	18.6253	17.9088	20.2194	0.00159559	-0.934989	Molecular Function: catalytic activity (GO:0003824);; Biological Process: trehalose biosynthetic process (GO:0005992);;	K16055|0|sind:105155653|K16055 trehalose 6-phosphate synthase/phosphatase [EC:2.4.1.15 3.1.3.12] | (RefSeq) probable alpha,alpha-trehalose-phosphate synthase [UDP-forming] 11	Starch and sucrose metabolism (ko00500)	Carbohydrate transport and metabolism	Probable alpha,alpha-trehalose-phosphate synthase [UDP-forming] 11 OS=Arabidopsis thaliana OX=3702 GN=TPS11 PE=2 SV=1
scaffold1219.23	34.1795	7.16817	35.0922	9.40385	9.22955	6.58354	0.00159989	-1.54572	Molecular Function: DNA binding (GO:0003677);; Molecular Function: transcription factor activity, sequence-specific DNA binding (GO:0003700);; Cellular Component: nucleus (GO:0005634);; Biological Process: regulation of transcription, DNA-templated (GO:0006355);;	K09286|1.09193e-55|sind:105174898|K09286 EREBP-like factor | (RefSeq) ethylene-responsive transcription factor 3-like	--	--	Ethylene-responsive transcription factor 3 OS=Nicotiana tabacum OX=4097 GN=ERF3 PE=2 SV=1
newGene_3941	3.048	1.45085	1.47641	7.90294	1.87243	17.502	0.00168672	2.19895	Cellular Component: extracellular region (GO:0005576);; Molecular Function: manganese ion binding (GO:0030145);; Molecular Function: nutrient reservoir activity (GO:0045735);;	--	--	--	Germin-like protein subfamily 1 member 13 OS=Arabidopsis thaliana OX=3702 GN=GLP6 PE=2 SV=2
scaffold1005.5	0.313491	0.5295	3.55993	0.409756	1.2871	88.8071	0.00170165	4.41988	--	--	--	General function prediction only	Zinc finger protein ZAT10 OS=Arabidopsis thaliana OX=3702 GN=ZAT10 PE=2 SV=1
C221085.7	2.27384	0.285941	0	9.51329	0.587708	39.8112	0.00170317	4.17153	--	--	--	--	36.4 kDa proline-rich protein OS=Solanum lycopersicum OX=4081 GN=TPRP-F1 PE=2 SV=1
scaffold367.34	0.935536	0.637221	0.299425	3.42971	2.15436	2.06274	0.00178793	2.00885	Molecular Function: DNA binding (GO:0003677);; Biological Process: regulation of transcription, DNA-templated (GO:0006355);;	--	--	--	Floricaula protein OS=Antirrhinum majus OX=4151 GN=FLO PE=2 SV=1
C220963.1	32.6509	26.2786	27.0412	12.1007	15.3429	15.2618	0.00182124	-0.966435	Cellular Component: integral component of membrane (GO:0016021);; Biological Process: transmembrane transport (GO:0055085);;	--	--	--	Metal-nicotianamine transporter YSL3 OS=Arabidopsis thaliana OX=3702 GN=YSL3 PE=2 SV=1
scaffold4853.8	4.11028	6.48098	5.67152	1.08577	0.868232	2.68854	0.00190451	-1.79055	--	--	--	--	--
C204897.1	28.0715	35.1959	17.3436	55.8007	67.127	48.3221	0.00205464	1.09737	Cellular Component: integral component of membrane (GO:0016021);;	--	--	--	UPF0496 protein At4g34320 OS=Arabidopsis thaliana OX=3702 GN=At4g34320 PE=2 SV=1
scaffold239.4	67.4242	52.5821	49.886	31.6211	27.0485	24.293	0.00206067	-0.952625	Molecular Function: nucleotide binding (GO:0000166);; Molecular Function: copper ion binding (GO:0005507);; Cellular Component: endosome (GO:0005768);; Cellular Component: trans-Golgi network (GO:0005802);; Cellular Component: integral component of plasma membrane (GO:0005887);; Biological Process: response to ethylene (GO:0009723);; Biological Process: regulation of stomatal movement (GO:0010119…	K17686|0|sind:105175894|K17686 Cu+-exporting ATPase [EC:3.6.3.54] | (RefSeq) copper-transporting ATPase RAN1	--	Inorganic ion transport and metabolism	Copper-transporting ATPase RAN1 OS=Arabidopsis thaliana OX=3702 GN=RAN1 PE=1 SV=1
C219717.2	0.494394	1.40285	0	10.5456	1.86333	4.05276	0.00217219	3.0709	Molecular Function: binding (GO:0005488);;	K20044|3.16779e-14|spen:107010434|K20044 phosphatidylinositol-binding clathrin assembly protein | (RefSeq) putative clathrin assembly protein At5g57200	--	Signal transduction mechanisms;; Intracellular trafficking, secretion, and vesicular transport	Putative clathrin assembly protein At4g25940 OS=Arabidopsis thaliana OX=3702 GN=At4g25940 PE=2 SV=1
newGene_2059	40.1752	26.3549	36.8734	3.24832	6.28881	0	0.002209	-3.39281	Molecular Function: protein serine/threonine kinase activity (GO:0004674);; Molecular Function: ATP binding (GO:0005524);; Biological Process: protein phosphorylation (GO:0006468);; Cellular Component: integral component of membrane (GO:0016021);;	--	--	Signal transduction mechanisms	Receptor-like protein kinase HERK 1 OS=Arabidopsis thaliana OX=3702 GN=HERK1 PE=1 SV=1
scaffold8801.2	15.8975	23.8899	12.7427	43.3397	29.9971	51.5391	0.00222766	1.25555	Molecular Function: transmembrane receptor protein serine/threonine kinase activity (GO:0004675);; Molecular Function: non-membrane spanning protein tyrosine kinase activity (GO:0004715);; Molecular Function: protein binding (GO:0005515);; Molecular Function: ATP binding (GO:0005524);; Cellular Component: plasma membrane (GO:0005886);; Biological Process: cell surface receptor signaling pathway (…	--	--	Signal transduction mechanisms	Serine/threonine-protein kinase RIPK OS=Arabidopsis thaliana OX=3702 GN=RIPK PE=1 SV=1
C214675.3	0.070172	0.770806	0.04091	1.21072	3.3819	2.16762	0.00226805	2.80731	--	--	--	--	--
newGene_5848	10.5759	7.21669	112.645	10.0417	9.79313	4.6866	0.00237532	-2.32084	Biological Process: metabolic process (GO:0008152);; Molecular Function: transferase activity, transferring hexosyl groups (GO:0016758);;	--	--	Carbohydrate transport and metabolism;; Energy production and conversion	UDP-glycosyltransferase 73C5 OS=Arabidopsis thaliana OX=3702 GN=UGT73C5 PE=2 SV=1
scaffold11667.17	8.0544	2.89786	0.868594	6.68487	6.0677	63.2956	0.00250969	2.68331	--	--	--	--	Thaumatin-like protein OS=Actinidia deliciosa OX=3627 GN=tlp PE=1 SV=2
newGene_4005	6.11361	3.66079	0.797579	12.4137	9.68689	9.46346	0.00263498	1.70672	Biological Process: metabolic process (GO:0008152);; Molecular Function: rosmarinate synthase activity (GO:0050266);;	K13065|1.6792e-129|gra:105769369|K13065 shikimate O-hydroxycinnamoyltransferase [EC:2.3.1.133] | (RefSeq) shikimate O-hydroxycinnamoyltransferase	Phenylpropanoid biosynthesis (ko00940);; Flavonoid biosynthesis (ko00941);; Stilbenoid, diarylheptanoid and gingerol biosynthesis (ko00945)	--	Rosmarinate synthase OS=Melissa officinalis OX=39338 GN=RAS PE=1 SV=1
C221651.2	6.88253	8.30454	8.80136	15.2817	13.7332	18.4834	0.00269293	0.998369	--	--	--	--	bZIP transcription factor 18 OS=Arabidopsis thaliana OX=3702 GN=BZIP18 PE=1 SV=1
scaffold8569.11	10.2912	20.7501	7.12572	3.68518	5.22314	4.16789	0.00283144	-1.54216	Molecular Function: DNA binding (GO:0003677);;	K09422|7.4193e-87|sind:105171821|K09422 myb proto-oncogene protein, plant | (RefSeq) myb-related protein 305	--	Transcription	Myb-related protein 305 OS=Antirrhinum majus OX=4151 GN=MYB305 PE=2 SV=1
scaffold12769.11	4.72522	1.64172	4.40473	0.897185	0.597361	1.48919	0.0028612	-1.79803	Molecular Function: serine-type endopeptidase activity (GO:0004252);; Cellular Component: Golgi apparatus (GO:0005794);; Biological Process: proteolysis (GO:0006508);; Cellular Component: plant-type cell wall (GO:0009505);; Cellular Component: plasmodesma (GO:0009506);;	--	--	--	Subtilisin-like protease SBT1.8 OS=Arabidopsis thaliana OX=3702 GN=SBT1.8 PE=1 SV=1
scaffold4311.2	1.69341	1.37807	1.46521	0.294152	0.597506	0.223169	0.00294716	-1.93136	--	--	--	--	--
scaffold11624.1	61.9702	93.6316	49.2284	113.239	163.669	139.179	0.00302523	1.03278	Molecular Function: structural constituent of ribosome (GO:0003735);; Biological Process: translation (GO:0006412);; Biological Process: mitochondrial transport (GO:0006839);; Cellular Component: integral component of membrane (GO:0016021);; Cellular Component: mitochondrial membrane (GO:0031966);;	K15104|1.5872e-173|sind:105178259|K15104 solute carrier family 25 (mitochondrial oxoglutarate transporter), member 11 | (RefSeq) mitochondrial uncoupling protein 5-like	--	Energy production and conversion	Mitochondrial uncoupling protein 5 OS=Arabidopsis thaliana OX=3702 GN=PUMP5 PE=2 SV=1
scaffold11653.2	31.2863	3.50654	32.3037	0.258355	5.09426	0.009677	0.00307193	-3.56451	Molecular Function: DNA binding (GO:0003677);; Molecular Function: transcription factor activity, sequence-specific DNA binding (GO:0003700);; Cellular Component: nucleus (GO:0005634);; Biological Process: regulation of transcription, DNA-templated (GO:0006355);;	K09286|1.58599e-55|sind:105174898|K09286 EREBP-like factor | (RefSeq) ethylene-responsive transcription factor 3-like	--	--	Ethylene-responsive transcription factor 3 OS=Nicotiana tabacum OX=4097 GN=ERF3 PE=2 SV=1
C214165.1	32.1792	23.9447	39.8096	18.8353	9.91868	15.0178	0.00338549	-1.09628	Cellular Component: integral component of membrane (GO:0016021);;	--	--	--	Uncharacterized protein At5g65660 OS=Arabidopsis thaliana OX=3702 GN=At5g65660 PE=2 SV=1
scaffold5111.4	24.6793	16.326	25.8457	10.3692	14.0857	6.35399	0.00342605	-1.08852	Biological Process: cytokinin metabolic process (GO:0009690);; Molecular Function: oxidoreductase activity, acting on CH-OH group of donors (GO:0016614);; Molecular Function: cytokinin dehydrogenase activity (GO:0019139);; Molecular Function: flavin adenine dinucleotide binding (GO:0050660);; Biological Process: oxidation-reduction process (GO:0055114);;	K00279|7.23552e-148|sind:105164613|K00279 cytokinin dehydrogenase [EC:1.5.99.12] | (RefSeq) cytokinin dehydrogenase 7	Zeatin biosynthesis (ko00908)	Energy production and conversion	Cytokinin dehydrogenase 7 OS=Arabidopsis thaliana OX=3702 GN=CKX7 PE=1 SV=1
scaffold1961.5	12.2718	14.7408	16.2274	3.17427	3.90217	12.1142	0.00346451	-1.21516	Biological Process: cellular process (GO:0009987);;	--	--	Signal transduction mechanisms	Histidine kinase CKI1 OS=Arabidopsis thaliana OX=3702 GN=CKI1 PE=1 SV=1
C220359.5	13.3656	12.8422	21.2962	7.5717	3.54283	7.72649	0.00363502	-1.29907	Molecular Function: monooxygenase activity (GO:0004497);; Molecular Function: iron ion binding (GO:0005506);; Molecular Function: oxidoreductase activity, acting on paired donors, with incorporation or reduction of molecular oxygen (GO:0016705);; Molecular Function: heme binding (GO:0020037);; Biological Process: oxidation-reduction process (GO:0055114);;	--	--	Secondary metabolites biosynthesis, transport and catabolism	Ferruginol synthase OS=Salvia miltiorrhiza OX=226208 GN=CYP76AH1 PE=1 SV=1
scaffold3953.6	0.08663	1.30337	0.198909	1.34188	5.45069	2.64796	0.00369309	2.49555	--	--	--	--	Putative F-box/FBD/LRR-repeat protein At3g49030 OS=Arabidopsis thaliana OX=3702 GN=At3g49030 PE=4 SV=1
scaffold4200.4	3.48723	4.27691	3.90218	4.00775	21.3251	4.39385	0.00383269	1.83077	Molecular Function: ligase activity (GO:0016874);; Biological Process: cellular modified amino acid biosynthetic process (GO:0042398);;	K01919|0|sind:105157843|K01919 glutamate--cysteine ligase [EC:6.3.2.2] | (RefSeq) glutamate--cysteine ligase, chloroplastic-like	Cysteine and methionine metabolism (ko00270);; Glutathione metabolism (ko00480)	--	Glutamate--cysteine ligase, chloroplastic OS=Arabidopsis thaliana OX=3702 GN=GSH1 PE=1 SV=2
scaffold7125.26	32.8422	26.8357	33.4266	19.5851	11.5504	13.8808	0.00384052	-1.01886	Biological Process: defense response (GO:0006952);;	--	--	--	Protein LURP-one-related 8 OS=Arabidopsis thaliana OX=3702 GN=At2g38640 PE=2 SV=1
newGene_22807	36.2003	34.2914	41.8671	13.5815	23.2202	16.4032	0.00384945	-1.04577	Molecular Function: nucleic acid binding (GO:0003676);;	--	--	Function unknown	--
scaffold538.3	0.796466	1.539	1.25414	3.34002	3.63309	2.49326	0.00388858	1.40946	--	--	--	--	Protein PLASTID MOVEMENT IMPAIRED 15 OS=Arabidopsis thaliana OX=3702 GN=PMI15 PE=2 SV=3
scaffold6697.9	8.96382	5.37562	3.64122	3.44018	1.38935	1.62495	0.00410038	-1.34064	Molecular Function: transferase activity, transferring glycosyl groups (GO:0016757);;	K06119|0|sind:105174543|K06119 sulfoquinovosyltransferase [EC:2.4.1.-] | (RefSeq) uncharacterized LOC105174543	Glycerolipid metabolism (ko00561)	Cell wall/membrane/envelope biogenesis;; Posttranslational modification, protein turnover, chaperones;; Lipid transport and metabolism	Sulfoquinovosyl transferase SQD2 OS=Arabidopsis thaliana OX=3702 GN=SQD2 PE=1 SV=1
scaffold12095.1	45.0583	50.009	33.4073	63.6491	87.5066	90.9643	0.00421992	0.929979	Cellular Component: integral component of membrane (GO:0016021);;	--	--	--	O-fucosyltransferase 20 OS=Arabidopsis thaliana OX=3702 GN=OFUT20 PE=1 SV=1
scaffold11416.9	2.7455	3.5153	2.54372	0.743498	0.957734	1.19255	0.00428867	-1.58601	--	--	--	--	Zinc-finger homeodomain protein 2 OS=Arabidopsis thaliana OX=3702 GN=ZHD1 PE=1 SV=1
scaffold4336.10	2.8184	2.77193	3.48819	0.96603	0.93869	1.46862	0.00435519	-1.37435	Molecular Function: hydrolase activity, hydrolyzing O-glycosyl compounds (GO:0004553);; Biological Process: carbohydrate metabolic process (GO:0005975);; Cellular Component: integral component of membrane (GO:0016021);;	--	--	--	Glucan endo-1,3-beta-glucosidase 11 OS=Arabidopsis thaliana OX=3702 GN=At1g32860 PE=1 SV=1
scaffold163.6	41.5974	74.0305	28.4206	19.5002	30.1245	10.8604	0.0045591	-1.31618	Molecular Function: glutamate dehydrogenase [NAD(P)+] activity (GO:0004353);; Biological Process: cellular amino acid metabolic process (GO:0006520);; Biological Process: oxidation-reduction process (GO:0055114);;	K00261|0|sind:105159631|K00261 glutamate dehydrogenase (NAD(P)+) [EC:1.4.1.3] | (RefSeq) glutamate dehydrogenase B	Arginine biosynthesis (ko00220);; Alanine, aspartate and glutamate metabolism (ko00250);; Nitrogen metabolism (ko00910);; Carbon metabolism (ko01200)	Amino acid transport and metabolism	Glutamate dehydrogenase B OS=Nicotiana plumbaginifolia OX=4092 GN=GDHB PE=2 SV=1
scaffold5039.11	7.99875	2.28766	0.424577	7.6088	5.77432	53.1166	0.00456547	2.63484	--	--	--	--	Thaumatin-like protein OS=Actinidia deliciosa OX=3627 GN=tlp PE=1 SV=2
newGene_4243	1.59452	1.74361	6.25588	1.00007	0.964283	0.758445	0.00481071	-1.74915	Molecular Function: structural constituent of ribosome (GO:0003735);; Cellular Component: ribosome (GO:0005840);; Biological Process: translation (GO:0006412);;	K02980|1.59362e-14|adu:107464533|K02980 small subunit ribosomal protein S29e | (RefSeq) 40S ribosomal protein S29-like	Ribosome (ko03010)	Translation, ribosomal structure and biogenesis	40S ribosomal protein S29 OS=Triticum aestivum OX=4565 GN=RPS29 PE=1 SV=1
scaffold663.5	2.79895	1.03333	0.69224	4.66444	4.92938	4.92742	0.0048291	1.63076	--	--	--	--	Thioredoxin-like fold domain-containing protein MRL7, chloroplastic OS=Arabidopsis thaliana OX=3702 GN=MRL7 PE=1 SV=1
scaffold142.35	0.580217	1.87501	0.940389	8.72096	8.18744	0.395457	0.00488631	2.35153	Molecular Function: peroxidase activity (GO:0004601);; Molecular Function: binding (GO:0005488);; Biological Process: metabolic process (GO:0008152);; Cellular Component: plant-type cell wall (GO:0009505);; Biological Process: plant-type cell wall organization (GO:0009664);; Biological Process: response to stimulus (GO:0050896);;	K00430|6.32508e-109|sind:105161263|K00430 peroxidase [EC:1.11.1.7] | (RefSeq) peroxidase 5-like	Phenylpropanoid biosynthesis (ko00940)	--	Peroxidase 5 OS=Vitis vinifera OX=29760 GN=GSVIVT00037159001 PE=1 SV=2
scaffold5494.4	23.0848	12.1716	19.4445	4.93289	12.1023	5.99744	0.00507435	-1.21411	Molecular Function: hydrolase activity (GO:0016787);;	--	--	--	Probable strigolactone esterase DAD2 OS=Petunia hybrida OX=4102 GN=DAD2 PE=1 SV=1
scaffold4300.2	8.30669	11.0494	8.59909	12.8365	16.5807	22.0115	0.00518682	1.03146	--	--	--	--	Protein PLASTID TRANSCRIPTIONALLY ACTIVE 14 OS=Arabidopsis thaliana OX=3702 GN=PTAC14 PE=1 SV=1
scaffold2714.38	7.32074	7.8932	11.3362	4.57796	3.58239	4.20921	0.00519413	-1.07571	--	--	--	--	B2 protein OS=Daucus carota OX=4039 PE=2 SV=1
C222555.3	9.52914	4.75958	8.29181	14.66	12.6257	16.8681	0.00545623	1.00097	Molecular Function: nucleotide binding (GO:0000166);; Molecular Function: protein kinase activity (GO:0004672);; Cellular Component: membrane (GO:0016020);;	--	--	Signal transduction mechanisms	Probable receptor-like protein kinase At1g11050 OS=Arabidopsis thaliana OX=3702 GN=At1g11050 PE=2 SV=1
scaffold6895.1	8.83119	11.3516	4.62603	13.401	20.289	21.9034	0.00547697	1.16965	Molecular Function: protein dimerization activity (GO:0046983);;	--	--	--	--
scaffold1750.2	3.50863	0.973331	3.09022	0.784795	0.87319	0.362176	0.00550873	-1.8298	Molecular Function: DNA binding (GO:0003677);;	K09422|3.83972e-80|sind:105176174|K09422 myb proto-oncogene protein, plant | (RefSeq) protein rough sheath 2 homolog	--	Transcription	Protein rough sheath 2 OS=Zea mays OX=4577 GN=RS2 PE=1 SV=1
C221885.8	1.08826	2.95403	3.77726	4.82032	4.69738	9.70625	0.00566265	1.31322	Molecular Function: nucleotide binding (GO:0000166);; Molecular Function: protein kinase activity (GO:0004672);; Biological Process: phosphorylation (GO:0016310);;	--	--	Signal transduction mechanisms	Probable serine/threonine-protein kinase PBL23 OS=Arabidopsis thaliana OX=3702 GN=PBL23 PE=2 SV=1
scaffold8828.2	11.8278	26.2117	11.676	75.3884	17.5179	107.248	0.0057444	1.28834	Molecular Function: oxidoreductase activity (GO:0016491);; Biological Process: oxidation-reduction process (GO:0055114);;	--	--	Energy production and conversion	Probable aldo-keto reductase 5 OS=Arabidopsis thaliana OX=3702 GN=At1g60730 PE=2 SV=1
newGene_67	0	1.95099	0.567351	2.6988	9.78618	6.01676	0.00579292	2.85782	--	K10571|4.29906e-09|sind:105161974|K10571 de-etiolated-1 | (RefSeq) light-mediated development protein DET1	Ubiquitin mediated proteolysis (ko04120)	--	Light-mediated development protein DET1 OS=Solanum lycopersicum OX=4081 GN=DET1 PE=1 SV=1
scaffold7981.8	2.50155	1.69905	4.94194	1.1183	1.16469	0.971598	0.00594501	-1.41637	Molecular Function: N,N-dimethylaniline monooxygenase activity (GO:0004499);; Molecular Function: flavin adenine dinucleotide binding (GO:0050660);; Molecular Function: NADP binding (GO:0050661);; Biological Process: oxidation-reduction process (GO:0055114);;	K11816|5.48943e-162|tcc:TCM_037137|K11816 indole-3-pyruvate monooxygenase [EC:1.14.13.168] | (RefSeq) Flavin-binding monooxygenase family protein	Tryptophan metabolism (ko00380)	Secondary metabolites biosynthesis, transport and catabolism	Indole-3-pyruvate monooxygenase YUCCA6 OS=Arabidopsis thaliana OX=3702 GN=YUC6 PE=1 SV=1
scaffold9328.6	0.455715	0.644537	0.524094	0.786027	3.54429	1.58343	0.00601989	1.67129	--	--	--	--	--
C222533.2	30.204	37.9995	35.9511	52.9175	89.4683	53.8041	0.0061576	0.939697	Molecular Function: structural constituent of ribosome (GO:0003735);; Biological Process: translation (GO:0006412);; Biological Process: mitochondrial transport (GO:0006839);; Cellular Component: integral component of membrane (GO:0016021);; Cellular Component: mitochondrial membrane (GO:0031966);; Biological Process: transmembrane transport (GO:0055085);;	K15104|2.25583e-137|sind:105178259|K15104 solute carrier family 25 (mitochondrial oxoglutarate transporter), member 11 | (RefSeq) mitochondrial uncoupling protein 5-like	--	Energy production and conversion	Mitochondrial uncoupling protein 5 OS=Arabidopsis thaliana OX=3702 GN=PUMP5 PE=2 SV=1
newGene_12397	34.6202	24.5973	23.1937	9.41214	0.614795	12.3832	0.00618307	-1.86216	Molecular Function: zinc ion transmembrane transporter activity (GO:0005385);; Cellular Component: integral component of membrane (GO:0016021);; Biological Process: zinc II ion transmembrane transport (GO:0071577);;	K14709|9.43405e-117|sind:105170429|K14709 solute carrier family 39 (zinc transporter), member 1/2/3 | (RefSeq) zinc transporter 2	--	Inorganic ion transport and metabolism	Zinc transporter 1 OS=Oryza sativa subsp. japonica OX=39947 GN=ZIP1 PE=1 SV=1
newGene_16720	0.964992	0.650409	0.52033	5.6504	0.6653	2.59549	0.00618629	2.01632	Molecular Function: monooxygenase activity (GO:0004497);; Molecular Function: iron ion binding (GO:0005506);; Cellular Component: membrane (GO:0016020);; Molecular Function: oxidoreductase activity, acting on paired donors, with incorporation or reduction of molecular oxygen (GO:0016705);; Molecular Function: heme binding (GO:0020037);; Biological Process: oxidation-reduction process (GO:0055114)…	--	--	Secondary metabolites biosynthesis, transport and catabolism	Ferruginol synthase OS=Salvia miltiorrhiza OX=226208 GN=CYP76AH1 PE=1 SV=1
C219969.1	5.70264	8.64878	6.2359	2.48724	2.85747	2.11243	0.00620255	-1.43613	--	--	--	--	--
scaffold9993.2	38.388	11.6751	35.4552	11.5951	11.2915	13.1327	0.00635148	-1.20261	--	--	--	--	Protein TPLATE OS=Arabidopsis thaliana OX=3702 GN=TPLATE PE=1 SV=1
scaffold4224.15	4.24978	0.318104	3.85591	5.33153	12.645	15.5597	0.00653909	2.03584	--	--	--	--	--
newGene_4370	22.5058	43.8968	6.65809	72.2128	45.3416	87.5666	0.00655978	1.47282	Molecular Function: serine-type endopeptidase activity (GO:0004252);; Biological Process: proteolysis (GO:0006508);; Molecular Function: serine-type exopeptidase activity (GO:0070008);;	K01322|1.36973e-84|sind:105159375|K01322 prolyl oligopeptidase [EC:3.4.21.26] | (RefSeq) prolyl endopeptidase-like	--	Posttranslational modification, protein turnover, chaperones	--
scaffold5029.6	27.667	3.79728	8.67856	142.904	72.3628	2.73612	0.00663579	2.47518	Molecular Function: carbohydrate binding (GO:0030246);;	--	--	--	Lectin-related protein (Fragment) OS=Cladrastis kentukea OX=38412 PE=1 SV=1
scaffold215.22	166.722	285.426	163.417	356.904	399.254	391.165	0.00675788	0.908853	Molecular Function: copper ion binding (GO:0005507);; Cellular Component: extracellular region (GO:0005576);; Molecular Function: oxidoreductase activity, oxidizing metal ions (GO:0016722);; Biological Process: single-organism metabolic process (GO:0044710);;	K05909|0|sind:105174721|K05909 laccase [EC:1.10.3.2] | (RefSeq) laccase-7	--	Secondary metabolites biosynthesis, transport and catabolism	Laccase 7
scaffold11516.2	17.1392	23.9612	10.4541	27.9659	40.1368	37.7823	0.00678197	1.04463	Molecular Function: zinc ion binding (GO:0008270);; Cellular Component: integral component of membrane (GO:0016021);; Biological Process: protein ubiquitination (GO:0016567);; Biological Process: proteasome-mediated ubiquitin-dependent protein catabolic process (GO:0043161);; Molecular Function: ubiquitin protein ligase activity (GO:0061630);;	--	--	Posttranslational modification, protein turnover, chaperones	RING-H2 finger protein ATL54 OS=Arabidopsis thaliana OX=3702 GN=ATL54 PE=2 SV=2
C204055.1	2.17032	0.759808	2.73301	0.741847	0.113631	0.550259	0.00688688	-1.93042	Biological Process: proteolysis (GO:0006508);; Molecular Function: omega peptidase activity (GO:0008242);;	K11863|9.1342e-139|sind:105161566|K11863 Ataxin-3 [EC:3.4.22.-] | (RefSeq) ataxin-3 homolog	Protein processing in endoplasmic reticulum (ko04141)	General function prediction only	Ataxin-3 homolog OS=Arabidopsis thaliana OX=3702 GN=At3g54130 PE=2 SV=1
scaffold6200.1	20.2396	29.6897	16.0536	39.4857	44.4574	41.7073	0.00692927	0.936418	Molecular Function: calmodulin binding (GO:0005516);; Biological Process: response to stress (GO:0006950);;	--	--	--	Protein SAR DEFICIENT 1 OS=Arabidopsis thaliana OX=3702 GN=SARD1 PE=1 SV=1
newGene_23596	8.32535	2.2323	2.60303	24.5767	3.84539	18.7582	0.00698472	1.85694	Cellular Component: extracellular region (GO:0005576);; Cellular Component: cell wall (GO:0005618);; Molecular Function: manganese ion binding (GO:0030145);; Biological Process: oxalate metabolic process (GO:0033609);; Molecular Function: nutrient reservoir activity (GO:0045735);; Molecular Function: oxalate decarboxylase activity (GO:0046564);;	--	--	--	Germin-like protein subfamily 1 member 13 OS=Arabidopsis thaliana OX=3702 GN=GLP6 PE=2 SV=2
scaffold2008.52	0.326457	0.472806	1.2113	3.3383	2.01836	1.30897	0.00702612	1.75663	Molecular Function: phenylalanine-tRNA ligase activity (GO:0004826);; Cellular Component: cytoplasm (GO:0005737);; Biological Process: phenylalanyl-tRNA aminoacylation (GO:0006432);; Molecular Function: rRNA (uridine-N3-)-methyltransferase activity (GO:0070042);; Biological Process: rRNA base methylation (GO:0070475);;	K19307|3.41548e-96|sind:105175009|K19307 25S rRNA (uracil2634-N3)-methyltransferase [EC:2.1.1.313] | (RefSeq) uncharacterized protein At4g26485-like	--	Function unknown	Heavy metal-associated isoprenylated plant protein 41 OS=Arabidopsis thaliana OX=3702 GN=HIPP41 PE=3 SV=1
C218037.3	14.2128	1.92417	9.3804	4.00072	2.2049	2.48192	0.00743785	-1.5174	Cellular Component: membrane (GO:0016020);;	--	--	--	--
newGene_3163	14.0549	5.84742	10.4109	3.25553	2.58334	4.25207	0.00757725	-1.53157	Molecular Function: peroxidase activity (GO:0004601);; Cellular Component: extracellular region (GO:0005576);; Biological Process: response to oxidative stress (GO:0006979);; Cellular Component: plant-type cell wall (GO:0009505);; Biological Process: plant-type cell wall organization (GO:0009664);; Cellular Component: integral component of membrane (GO:0016021);; Molecular Function: heme binding …	K00430|8.95872e-30|gmx:100796105|K00430 peroxidase [EC:1.11.1.7] | (RefSeq) peroxidase 47-like	Phenylpropanoid biosynthesis (ko00940)	--	Peroxidase 47 OS=Arabidopsis thaliana OX=3702 GN=PER47 PE=2 SV=2
scaffold6746.9	2.99496	4.012	3.69904	0.864928	1.62382	1.04278	0.00762538	-1.55367	Biological Process: defense response to oomycetes (GO:0002229);; Biological Process: response to cold (GO:0009409);; Biological Process: response to wounding (GO:0009611);; Biological Process: response to salt stress (GO:0009651);; Biological Process: response to ethylene (GO:0009723);; Biological Process: response to abscisic acid (GO:0009737);; Biological Process: response to salicylic acid (GO…	--	--	--	CASP-like protein PIMP1 OS=Capsicum annuum OX=4072 GN=PIMP1 PE=2 SV=1
scaffold12722.19	16.7727	9.71184	14.3688	7.1879	3.96202	7.92705	0.00791049	-1.06822	--	--	--	--	Cyclic dof factor 1 OS=Arabidopsis thaliana OX=3702 GN=CDF1 PE=1 SV=2
C220359.4	12.9222	8.96178	19.5531	7.30592	3.21857	6.42831	0.00791592	-1.24735	Molecular Function: iron ion binding (GO:0005506);; Cellular Component: membrane (GO:0016020);; Molecular Function: oxidoreductase activity, acting on paired donors, with incorporation or reduction of molecular oxygen, NAD(P)H as one donor, and incorporation of one atom of oxygen (GO:0016709);; Molecular Function: heme binding (GO:0020037);; Biological Process: secondary metabolite biosynthetic p…	--	--	Secondary metabolites biosynthesis, transport and catabolism	Cytochrome P450 76C1 OS=Arabidopsis thaliana OX=3702 GN=CYP76C1 PE=2 SV=1
newGene_14185	13.7741	2.12653	40.0295	6.45238	3.38052	5.22721	0.00798907	-1.82792	Molecular Function: transferase activity (GO:0016740);;	--	--	--	Probable S-adenosylmethionine-dependent methyltransferase At5g37990 OS=Arabidopsis thaliana OX=3702 GN=At5g37990 PE=3 SV=2
scaffold142.36	5.14659	15.1105	6.50774	2.7648	2.37839	2.88605	0.00802535	-1.70795	Molecular Function: peroxidase activity (GO:0004601);; Cellular Component: extracellular region (GO:0005576);; Biological Process: response to oxidative stress (GO:0006979);; Cellular Component: plant-type cell wall (GO:0009505);; Biological Process: plant-type cell wall organization (GO:0009664);; Molecular Function: heme binding (GO:0020037);; Biological Process: hydrogen peroxide catabolic pro…	K00430|4.54887e-20|sind:105161262|K00430 peroxidase [EC:1.11.1.7] | (RefSeq) peroxidase 5-like	Phenylpropanoid biosynthesis (ko00940)	--	Peroxidase 2 OS=Zea mays OX=4577 GN=PER2 PE=2 SV=1
scaffold8605.2	124.775	80.0698	125.512	68.585	64.8276	35.4812	0.00824051	-0.930459	Molecular Function: calcium-transporting ATPase activity (GO:0005388);; Molecular Function: calmodulin binding (GO:0005516);; Molecular Function: ATP binding (GO:0005524);; Cellular Component: integral component of membrane (GO:0016021);; Molecular Function: metal ion binding (GO:0046872);; Biological Process: calcium ion transmembrane transport (GO:0070588);;	K01537|1.4618e-92|sind:105159845|K01537 Ca2+-transporting ATPase [EC:3.6.3.8] | (RefSeq) calcium-transporting ATPase 4, plasma membrane-type-like	--	Inorganic ion transport and metabolism	Putative calcium-transporting ATPase 11, plasma membrane-type OS=Arabidopsis thaliana OX=3702 GN=ACA11 PE=1 SV=1
scaffold3875.7	3.77213	5.51563	1.80368	9.07161	7.67212	7.38924	0.00836487	1.12276	Molecular Function: zinc ion binding (GO:0008270);; Biological Process: nucleic acid metabolic process (GO:0090304);;	--	--	General function prediction only	Pentatricopeptide repeat-containing protein At1g59720, chloroplastic/mitochondrial OS=Arabidopsis thaliana OX=3702 GN=PCMP-H51 PE=1 SV=2
scaffold11918.4	2.37832	0.860253	9.0447	1.49272	0.703878	0.863628	0.00839112	-1.81972	Molecular Function: monooxygenase activity (GO:0004497);; Molecular Function: binding (GO:0005488);; Cellular Component: membrane (GO:0016020);; Molecular Function: oxidoreductase activity, acting on paired donors, with incorporation or reduction of molecular oxygen (GO:0016705);; Biological Process: single-organism metabolic process (GO:0044710);;	K20618|2.28236e-166|sind:105174219|K20618 cytochrome P450 family 76 subfamily A | (RefSeq) cytochrome P450 76A2-like	--	Secondary metabolites biosynthesis, transport and catabolism	Cytochrome P450 76A2 OS=Solanum melongena OX=4111 GN=CYP76A2 PE=2 SV=1
scaffold2902.2	89.9282	68.8196	75.2911	116.616	150.398	131.801	0.00861274	0.796676	Cellular Component: integral component of membrane (GO:0016021);;	--	--	--	--
scaffold5676.4	7.07489	3.22215	7.06054	16.726	12.6968	15.0887	0.00863735	0.975486	Molecular Function: protein kinase activity (GO:0004672);; Molecular Function: ATP binding (GO:0005524);; Biological Process: protein phosphorylation (GO:0006468);; Cellular Component: integral component of membrane (GO:0016021);; Molecular Function: oxidoreductase activity (GO:0016491);;	--	--	--	Cold-responsive protein kinase 1 OS=Arabidopsis thaliana OX=3702 GN=CRPK1 PE=1 SV=1
newGene_9916	3085.42	1494.98	1033.39	11437.9	4829.78	1097.13	0.00884527	1.62187	Molecular Function: carbohydrate binding (GO:0030246);;	--	--	--	Agglutinin-2 OS=Cladrastis kentukea OX=38412 PE=1 SV=1
C216523.2	225.643	345.614	216.324	416.71	441.367	551.112	0.00931328	0.85119	Cellular Component: integral component of membrane (GO:0016021);;	--	--	--	Protein EXORDIUM OS=Arabidopsis thaliana OX=3702 GN=EXO PE=2 SV=1
scaffold8787.3	3.99519	21.3834	0.039175	1.83264	0.069091	0.364059	0.00947025	-3.45268	Molecular Function: electron carrier activity (GO:0009055);;	--	--	--	--
newGene_1693	18.8651	7.36586	11.6672	3.10642	4.84575	7.0664	0.00953744	-1.30046	Molecular Function: iron ion binding (GO:0005506);; Molecular Function: dioxygenase activity (GO:0051213);; Biological Process: oxidation-reduction process (GO:0055114);;	--	--	Secondary metabolites biosynthesis, transport and catabolism;; General function prediction only	Probable 2-oxoglutarate-dependent dioxygenase At5g05600 OS=Arabidopsis thaliana OX=3702 GN=At5g05600 PE=2 SV=1
scaffold8762.12	33.1501	43.2777	19.9177	55.9291	40.7912	106.678	0.00961163	1.08027	Molecular Function: zinc ion transmembrane transporter activity (GO:0005385);; Cellular Component: plasma membrane (GO:0005886);; Cellular Component: integral component of membrane (GO:0016021);; Biological Process: zinc II ion transmembrane transport (GO:0071577);;	K14709|7.25481e-167|sind:105175109|K14709 solute carrier family 39 (zinc transporter), member 1/2/3 | (RefSeq) zinc transporter 1-like	--	Inorganic ion transport and metabolism	Zinc transporter 1 OS=Arabidopsis thaliana OX=3702 GN=ZIP1 PE=2 SV=1
scaffold3414.4	3.2252	2.8748	9.44319	1.78851	2.39698	1.39771	0.0096325	-1.41211	Biological Process: polyamine biosynthetic process (GO:0006596);; Molecular Function: carboxy-lyase activity (GO:0016831);; Biological Process: ammonium ion metabolic process (GO:0097164);;	K01611|4.67127e-107|sind:105171423|K01611 S-adenosylmethionine decarboxylase [EC:4.1.1.50] | (RefSeq) S-adenosylmethionine decarboxylase proenzyme 4	Cysteine and methionine metabolism (ko00270);; Arginine and proline metabolism (ko00330)	Signal transduction mechanisms	S-adenosylmethionine decarboxylase proenzyme 4 OS=Arabidopsis thaliana OX=3702 GN=SAMDC4 PE=1 SV=1
newGene_19099	21.6174	64.0391	7.00643	9.28344	5.01038	15.4433	0.00974864	-1.72969	--	K13993|3.90251e-49|pxb:103942700|K13993 HSP20 family protein | (RefSeq) 16.9 kDa class I heat shock protein 2-like	Protein processing in endoplasmic reticulum (ko04141)	Posttranslational modification, protein turnover, chaperones	18.5 kDa class I heat shock protein OS=Glycine max OX=3847 GN=HSP18.5-C PE=3 SV=1
scaffold11066.1	11.1659	3.59697	19.5485	16.3761	29.3879	30.6227	0.0101749	1.15702	Biological Process: metabolic process (GO:0008152);; Molecular Function: hydrolase activity (GO:0016787);;	K07025|3.99604e-143|sind:105171337|K07025 putative hydrolase of the HAD superfamily | (RefSeq) uncharacterized LOC105171337	--	General function prediction only	--
newGene_14625	2.87771	0.559642	5.57085	0.909558	1.07956	0.511285	0.0103101	-1.75004	Molecular Function: lyase activity (GO:0016829);; Molecular Function: metal ion binding (GO:0046872);;	--	--	--	(R)-limonene synthase OS=Lavandula angustifolia OX=39329 PE=1 SV=1
scaffold7207.5	0.91356	1.88727	4.86973	0.973103	0.16783	0	0.0103176	-2.67361	Cellular Component: integral component of plasma membrane (GO:0005887);; Molecular Function: L-amino acid transmembrane transporter activity (GO:0015179);; Molecular Function: polyamine transmembrane transporter activity (GO:0015203);; Molecular Function: antiporter activity (GO:0015297);; Biological Process: single-organism transport (GO:0044765);; Biological Process: transmembrane transport (GO…	--	--	Amino acid transport and metabolism	Probable polyamine transporter At3g19553 OS=Arabidopsis thaliana OX=3702 GN=At3g19553 PE=3 SV=1
scaffold1311.4	0.780299	2.77232	0.623132	0.356411	0.035662	0.518052	0.0105471	-2.18016	Biological Process: post-embryonic development (GO:0009791);; Biological Process: single organism reproductive process (GO:0044702);; Biological Process: reproductive structure development (GO:0048608);;	--	--	--	Late embryogenesis abundant protein At3g53040 OS=Arabidopsis thaliana OX=3702 GN=At3g53040 PE=2 SV=1
scaffold3008.16	18.0867	14.2618	14.5472	26.9196	25.165	25.9348	0.010657	0.778277	--	--	--	--	PH, RCC1 and FYVE domains-containing protein 1 OS=Arabidopsis thaliana OX=3702 GN=PRAF1 PE=1 SV=1
C222571.24	19.0642	49.2431	14.0157	41.6868	77.1767	69.3189	0.010684	1.18714	Molecular Function: hydrolase activity (GO:0016787);;	K07766|2.59312e-61|sind:105158504|K07766 diphosphoinositol-polyphosphate diphosphatase [EC:3.6.1.52] | (RefSeq) nudix hydrolase 18, mitochondrial-like	--	Signal transduction mechanisms	Nudix hydrolase 17, mitochondrial OS=Arabidopsis thaliana OX=3702 GN=NUDT17 PE=2 SV=1
newGene_13225	4.19096	3.83486	5.40765	2.13567	1.75563	2.00666	0.0108603	-1.15471	--	--	--	General function prediction only	Acyl-CoA-binding domain-containing protein 2 OS=Arabidopsis thaliana OX=3702 GN=ACBP2 PE=1 SV=1
scaffold12716.6	7.159	5.01974	3.67204	11.54	11.7263	7.15896	0.0113009	0.913183	Cellular Component: membrane (GO:0016020);; Cellular Component: intracellular organelle (GO:0043229);;	--	--	Signal transduction mechanisms;; Cytoskeleton	Formin-like protein 6 OS=Arabidopsis thaliana OX=3702 GN=FH6 PE=2 SV=1
scaffold10670.14	47.5316	55.2196	31.2496	61.0113	77.9242	108.309	0.0113698	0.894364	--	K09286|1.61313e-71|sind:105179200|K09286 EREBP-like factor | (RefSeq) ethylene-responsive transcription factor 5-like	--	--	Ethylene-responsive transcription factor 5 OS=Nicotiana sylvestris OX=4096 GN=ERF5 PE=2 SV=1
scaffold3802.3	16.9214	44.8107	14.0836	34.6391	61.5273	72.2733	0.0114368	1.14947	Biological Process: response to stress (GO:0006950);; Biological Process: cellular process (GO:0009987);; Biological Process: regulation of biological process (GO:0050789);; Biological Process: response to other organism (GO:0051707);;	--	--	--	Calmodulin-binding protein 60 B OS=Arabidopsis thaliana OX=3702 GN=CBP60B PE=2 SV=1
scaffold9614.6	21.6471	25.0774	12.8328	25.951	45.4556	40.8925	0.0120731	0.929222	--	--	--	General function prediction only	Zinc finger CCCH domain-containing protein 29 OS=Arabidopsis thaliana OX=3702 GN=At2g40140 PE=1 SV=1
C200345.1	30.6204	29.4891	27.883	53.4032	36.5985	61.385	0.0120924	0.8034	--	--	--	--	Protein ENHANCED DISEASE RESISTANCE 2-like OS=Arabidopsis thaliana OX=3702 GN=EDR2L PE=2 SV=1
scaffold4244.4	15.536	28.3075	33.5074	10.3368	8.77091	20.8062	0.0122171	-1.15546	Molecular Function: RNA binding (GO:0003723);; Molecular Function: structural constituent of ribosome (GO:0003735);; Biological Process: translation (GO:0006412);; Cellular Component: small ribosomal subunit (GO:0015935);;	K02985|1.09755e-40|nnu:104612879|K02985 small subunit ribosomal protein S3e | (RefSeq) 40S ribosomal protein S3-3	Ribosome (ko03010)	Translation, ribosomal structure and biogenesis	40S ribosomal protein S3-2 OS=Arabidopsis thaliana OX=3702 GN=RPS3B PE=1 SV=1
scaffold709.1	28.7882	7.50567	28.2191	12.4556	9.28245	3.67096	0.0124311	-1.29288	Molecular Function: glycine hydroxymethyltransferase activity (GO:0004372);; Biological Process: glycine metabolic process (GO:0006544);; Biological Process: L-serine metabolic process (GO:0006563);; Molecular Function: methyltransferase activity (GO:0008168);; Cellular Component: integral component of membrane (GO:0016021);; Molecular Function: pyridoxal phosphate binding (GO:0030170);; Biologic…	K00600|4.67665e-81|cam:101505991|K00600 glycine hydroxymethyltransferase [EC:2.1.2.1] | (RefSeq) serine hydroxymethyltransferase, mitochondrial-like	Glycine, serine and threonine metabolism (ko00260);; Cyanoamino acid metabolism (ko00460);; Glyoxylate and dicarboxylate metabolism (ko00630);; One carbon pool by folate (ko00670);; Carbon metabolism (ko01200);; Biosynthesis of amino acids (ko01230)	Amino acid transport and metabolism	Serine hydroxymethyltransferase 1, mitochondrial OS=Flaveria pringlei OX=4226 PE=2 SV=1
scaffold558.3	5.20229	5.5691	4.4561	9.94047	7.81962	15.2791	0.0125384	1.12871	--	--	--	General function prediction only	Protein C2-DOMAIN ABA-RELATED 5 OS=Arabidopsis thaliana OX=3702 GN=CAR5 PE=2 SV=1
scaffold4867.7	1.77182	2.70672	3.44186	0.746771	0.838776	1.26276	0.0125991	-1.32674	Biological Process: cellular protein metabolic process (GO:0044267);;	--	--	--	GTP-binding protein ERG OS=Antirrhinum majus OX=4151 GN=ERG PE=2 SV=1
scaffold651.25	27.5841	28.69	30.3963	23.8057	33.2035	48.2985	0.012666	0.878362	Cellular Component: mitochondrion (GO:0005739);;	--	--	--	--
newGene_20429	3.38734	4.56151	4.38912	1.82524	1.72905	1.16213	0.0127723	-1.35416	Molecular Function: galactokinase activity (GO:0004335);; Molecular Function: ATP binding (GO:0005524);; Cellular Component: cytoplasm (GO:0005737);; Biological Process: galactose metabolic process (GO:0006012);; Biological Process: carbohydrate phosphorylation (GO:0046835);;	K18677|9.08116e-65|sind:105173859|K18677 galacturonokinase [EC:2.7.1.44] | (RefSeq) galacturonokinase	Amino sugar and nucleotide sugar metabolism (ko00520)	Carbohydrate transport and metabolism	Galacturonokinase OS=Arabidopsis thaliana OX=3702 GN=GALAK PE=1 SV=1
scaffold6088.13	3.51321	1.90265	4.31442	1.37294	0.018163	0	0.0128475	-2.69866	--	--	--	--	--
newGene_15903	11.6921	16.7385	15.665	10.3861	2.03307	4.96265	0.0128955	-1.31431	Cellular Component: integral component of plasma membrane (GO:0005887);; Molecular Function: ammonium transmembrane transporter activity (GO:0008519);; Biological Process: organic cation transport (GO:0015695);; Biological Process: nitrogen utilization (GO:0019740);; Biological Process: ammonium transmembrane transport (GO:0072488);;	K03320|4.33307e-13|pxb:103937117|K03320 ammonium transporter, Amt family | (RefSeq) ammonium transporter 3 member 1-like	--	Inorganic ion transport and metabolism	Ammonium transporter 2 OS=Arabidopsis thaliana OX=3702 GN=AMT2 PE=1 SV=2
scaffold2159.3	5.84064	3.93513	8.92419	2.41542	2.60445	2.43689	0.0131703	-1.07532	--	--	--	Intracellular trafficking, secretion, and vesicular transport	Type I inositol polyphosphate 5-phosphatase 8 OS=Arabidopsis thaliana OX=3702 GN=IP5P8 PE=2 SV=1
newGene_8710	137.597	20.6722	115.812	34.5917	44.1168	8.69464	0.0132455	-1.58858	Molecular Function: ATP binding (GO:0005524);; Cellular Component: chloroplast (GO:0009507);;	--	--	Posttranslational modification, protein turnover, chaperones	Ribulose bisphosphate carboxylase/oxygenase activase, chloroplastic OS=Spinacia oleracea OX=3562 PE=1 SV=2
scaffold9171.1	54.7271	4.87717	112.691	24.8685	8.15585	15.5866	0.0133557	-1.7444	Cellular Component: membrane (GO:0016020);; Molecular Function: oxidoreductase activity (GO:0016491);; Molecular Function: metal ion binding (GO:0046872);;	--	--	Secondary metabolites biosynthesis, transport and catabolism;; Lipid transport and metabolism	Cytochrome P450 CYP72A219 OS=Panax ginseng OX=4054 PE=2 SV=1
scaffold9614.5	44.9731	50.8823	29.2207	68.7162	93.7431	73.7412	0.0134523	0.931006	--	--	--	General function prediction only	Zinc finger CCCH domain-containing protein 33 OS=Oryza sativa subsp. japonica OX=39947 GN=Os05g0128200 PE=2 SV=1
C222075.6	2.4009	0.820887	1.27027	0.749326	0.373494	0.289515	0.0137341	-1.59805	--	--	--	--	NAC domain-containing protein 7 OS=Arabidopsis thaliana OX=3702 GN=NAC007 PE=1 SV=2
C222149.15	0.056817	1.13722	0.590851	2.02526	0.369901	7.47831	0.0140307	2.4265	--	--	--	--	--
scaffold8096.10	23.941	14.8292	20.1197	12.6996	10.769	10.0636	0.0141669	-0.780634	Molecular Function: beta-galactosidase activity (GO:0004565);; Cellular Component: cell wall (GO:0005618);; Cellular Component: vacuole (GO:0005773);; Biological Process: carbohydrate metabolic process (GO:0005975);; Molecular Function: carbohydrate binding (GO:0030246);;	--	--	Carbohydrate transport and metabolism	Beta-galactosidase OS=Solanum lycopersicum OX=4081 PE=1 SV=1
scaffold9866.3	156.804	89.0781	41.7492	619.611	147.849	75.2336	0.0142102	1.56026	Molecular Function: chitinase activity (GO:0004568);; Cellular Component: extracellular region (GO:0005576);; Biological Process: carbohydrate metabolic process (GO:0005975);; Biological Process: chitin catabolic process (GO:0006032);; Molecular Function: chitin binding (GO:0008061);; Biological Process: defense response to fungus (GO:0050832);;	K01183|1.43599e-92|sind:105166717|K01183 chitinase [EC:3.2.1.14] | (RefSeq) acidic endochitinase SE2-like	Amino sugar and nucleotide sugar metabolism (ko00520)	Cell wall/membrane/envelope biogenesis	Acidic endochitinase OS=Vitis vinifera OX=29760 GN=CHIT3 PE=2 SV=1
scaffold9566.22	21.5612	20.9131	24.1783	12.5653	15.4792	8.64048	0.0142625	-0.833679	--	--	--	--	--
scaffold9967.2	0.552025	0.627959	0.402778	1.0988	1.75862	1.28835	0.0143598	1.44261	Cellular Component: membrane (GO:0016020);;	--	--	--	--
scaffold9243.42	2.14458	0.488513	3.00095	6.27259	4.13629	3.8683	0.0144444	1.39354	Molecular Function: copper ion binding (GO:0005507);; Biological Process: lignin catabolic process (GO:0046274);; Cellular Component: apoplast (GO:0048046);; Molecular Function: hydroquinone:oxygen oxidoreductase activity (GO:0052716);; Biological Process: oxidation-reduction process (GO:0055114);;	K05909|4.80711e-27|sind:105163916|K05909 laccase [EC:1.10.3.2] | (RefSeq) laccase-3-like	--	Secondary metabolites biosynthesis, transport and catabolism	Laccase 13
scaffold7984.4	10.6904	9.7069	9.31857	21.3833	16.0014	17.604	0.0146336	0.910692	--	K02183|1.3023e-31|sind:105167736|K02183 calmodulin | (RefSeq) probable calcium-binding protein CML45	Phosphatidylinositol signaling system (ko04070);; Plant-pathogen interaction (ko04626)	Signal transduction mechanisms	Probable calcium-binding protein CML45 OS=Arabidopsis thaliana OX=3702 GN=CML45 PE=1 SV=1
C187907.1	5.68629	2.94779	10.8942	2.03925	3.09588	0.749148	0.0146673	-1.66069	Cellular Component: membrane (GO:0016020);;	--	--	--	--
scaffold10815.6	1.02085	1.15293	0.935913	2.51847	2.13083	1.85978	0.0148081	1.32879	Molecular Function: binding (GO:0005488);;	K04733|2.46e-79|sind:105166738|K04733 interleukin-1 receptor-associated kinase 4 [EC:2.7.11.1] | (RefSeq) probable receptor-like protein kinase At1g67000	--	--	--
scaffold9927.27	10.8132	26.4036	24.1266	9.94226	11.593	10.7379	0.0148572	-0.903488	Cellular Component: exocyst (GO:0000145);; Biological Process: exocytosis (GO:0006887);;	K07195|0|sind:105170373|K07195 exocyst complex component 7 | (RefSeq) exocyst complex component EXO70A1	--	Intracellular trafficking, secretion, and vesicular transport	Exocyst complex component EXO70H1 OS=Arabidopsis thaliana OX=3702 GN=EXO70H1 PE=1 SV=1
scaffold12701.2	39.0816	22.7376	90.1539	23.2275	22.3886	21.113	0.0150561	-1.02489	Molecular Function: binding (GO:0005488);; Molecular Function: oxidoreductase activity (GO:0016491);;	--	--	Secondary metabolites biosynthesis, transport and catabolism;; Lipid transport and metabolism	Cytochrome P450 714C2 OS=Oryza sativa subsp. japonica OX=39947 GN=CYP714C2 PE=2 SV=1
C222087.1	7.30599	7.06563	12.3671	1.93167	5.77512	3.45775	0.0150668	-1.21376	--	--	--	--	F-box protein PP2-A13 OS=Arabidopsis thaliana OX=3702 GN=PP2A13 PE=1 SV=1
newGene_491	1.36285	1.16948	1.23047	3.79837	3.16897	2.11291	0.0152142	1.29839	Cellular Component: membrane (GO:0016020);;	--	--	--	--
scaffold1621.4	13.5678	17.3252	18.1587	9.42361	8.26379	7.52371	0.0153237	-0.931202	--	--	--	--	Transcription factor IBH1 OS=Arabidopsis thaliana OX=3702 GN=IBH1 PE=1 SV=1
scaffold5712.2	1.91656	0.643526	2.81249	0.99073	0.368311	0.130063	0.0153894	-1.76512	Cellular Component: membrane (GO:0016020);; Molecular Function: oxidoreductase activity (GO:0016491);;	--	--	Inorganic ion transport and metabolism;; Secondary metabolites biosynthesis, transport and catabolism	Ferric reduction oxidase 7, chloroplastic OS=Arabidopsis thaliana OX=3702 GN=FRO7 PE=2 SV=1
scaffold6083.35	6.23456	7.49685	11.6774	15.32	14.2444	15.2214	0.0155586	0.853281	Biological Process: lipid catabolic process (GO:0016042);; Molecular Function: hydrolase activity (GO:0016787);;	--	--	Lipid transport and metabolism	Probable inactive patatin-like protein 9 OS=Arabidopsis thaliana OX=3702 GN=PLP9 PE=2 SV=1
scaffold3605.1	1.66558	0.651796	0.825013	3.16054	1.88398	2.78313	0.0158158	1.39554	Molecular Function: iron ion binding (GO:0005506);; Cellular Component: membrane (GO:0016020);; Molecular Function: oxidoreductase activity, acting on paired donors, with incorporation or reduction of molecular oxygen, NAD(P)H as one donor, and incorporation of one atom of oxygen (GO:0016709);; Molecular Function: heme binding (GO:0020037);; Biological Process: secondary metabolite biosynthetic p…	--	--	Secondary metabolites biosynthesis, transport and catabolism	Cytochrome P450 82C4 OS=Arabidopsis thaliana OX=3702 GN=CYP82C4 PE=2 SV=1
scaffold11267.8	28.0731	10.6804	51.2367	19.9532	17.0875	11.0975	0.0158224	-1.06805	Molecular Function: ATP binding (GO:0005524);; Biological Process: transport (GO:0006810);; Cellular Component: integral component of membrane (GO:0016021);; Molecular Function: ATPase activity (GO:0016887);;	--	--	Secondary metabolites biosynthesis, transport and catabolism	Pleiotropic drug resistance protein 1 OS=Nicotiana tabacum OX=4097 GN=PDR1 PE=2 SV=1
scaffold11808.8	30.299	18.332	48.2041	12.5747	19.0551	18.8213	0.0158306	-0.892207	Biological Process: flavonoid biosynthetic process (GO:0009813);; Cellular Component: intracellular membrane-bounded organelle (GO:0043231);; Biological Process: flavonoid glucuronidation (GO:0052696);; Molecular Function: quercetin 3-O-glucosyltransferase activity (GO:0080043);; Molecular Function: quercetin 7-O-glucosyltransferase activity (GO:0080044);;	--	--	Carbohydrate transport and metabolism;; Energy production and conversion	7-deoxyloganetin glucosyltransferase OS=Gardenia jasminoides OX=114476 GN=UGT85A24 PE=1 SV=1
scaffold163.12	9.8977	11.5356	9.93192	11.7507	26.7425	18.1567	0.0159424	0.890413	--	--	--	--	IQ domain-containing protein IQM6 OS=Arabidopsis thaliana OX=3702 GN=IQM6 PE=2 SV=1
newGene_15938	34.2866	29.7423	31.6027	20.5605	10.0805	17.7885	0.0160107	-0.783284	Biological Process: cytochrome b6f complex assembly (GO:0010190);; Cellular Component: integral component of membrane (GO:0016021);; Cellular Component: thylakoid membrane (GO:0042651);;	--	--	--	--
newGene_1023	73.1173	9.9985	26.4694	69.6378	98.5718	87.579	0.01621	1.25966	Cellular Component: cytoplasm (GO:0005737);;	K08770|0|bdi:104585556|K08770 ubiquitin C | (RefSeq) polyubiquitin	--	Posttranslational modification, protein turnover, chaperones;; General function prediction only	Polyubiquitin 4 OS=Arabidopsis thaliana OX=3702 GN=UBQ4 PE=3 SV=1
scaffold10818.13	48.169	46.7684	36.4843	59.293	95.3238	73.2802	0.0162425	0.814996	Molecular Function: protein serine/threonine kinase activity (GO:0004674);; Molecular Function: ATP binding (GO:0005524);; Biological Process: protein phosphorylation (GO:0006468);; Biological Process: signal transduction (GO:0007165);;	K07198|9.12623e-84|nnu:104593799|K07198 5'-AMP-activated protein kinase, catalytic alpha subunit [EC:2.7.11.11] | (RefSeq) CBL-interacting protein kinase 18-like	Regulation of autophagy (ko04140)	Signal transduction mechanisms	CBL-interacting protein kinase 18 OS=Oryza sativa subsp. japonica OX=39947 GN=CIPK18 PE=2 SV=1
newGene_13480	24.9416	35.7458	17.5193	38.7308	57.9906	44.5005	0.0163499	0.862342	Molecular Function: ATP binding (GO:0005524);; Cellular Component: integral component of membrane (GO:0016021);;	K08900|2.07366e-172|sind:105165761|K08900 mitochondrial chaperone BCS1 | (RefSeq) vacuolar protein sorting-associated protein 4-like	--	Posttranslational modification, protein turnover, chaperones	AAA-ATPase At2g18193 OS=Arabidopsis thaliana OX=3702 GN=At2g18193 PE=2 SV=1
scaffold2363.8	4.38352	4.41943	7.40806	1.78937	3.68895	0.964216	0.0164361	-1.20536	Molecular Function: beta-N-acetylhexosaminidase activity (GO:0004563);; Cellular Component: plasma membrane (GO:0005886);; Biological Process: carbohydrate metabolic process (GO:0005975);; Cellular Component: plant-type cell wall (GO:0009505);;	K12373|0|sind:105161181|K12373 hexosaminidase [EC:3.2.1.52] | (RefSeq) beta-hexosaminidase 3	Other glycan degradation (ko00511);; Amino sugar and nucleotide sugar metabolism (ko00520);; Glycosaminoglycan degradation (ko00531);; Glycosphingolipid biosynthesis - globo series (ko00603);; Glycosphingolipid biosynthesis - ganglio series (ko00604)	Carbohydrate transport and metabolism	Beta-hexosaminidase 3 OS=Arabidopsis thaliana OX=3702 GN=HEXO3 PE=1 SV=1
newGene_23092	43.5541	60.5188	32.871	68.8152	107.051	68.9063	0.0166346	0.850764	--	--	--	Replication, recombination and repair	Protein ALP1-like OS=Arabidopsis thaliana OX=3702 GN=At3g55350 PE=2 SV=1
newGene_11872	23.4434	2.52222	53.7895	7.28206	8.11109	8.90841	0.0167292	-1.64081	--	--	--	--	Probable S-adenosylmethionine-dependent methyltransferase At5g38780 OS=Arabidopsis thaliana OX=3702 GN=At5g38780 PE=2 SV=1
newGene_5649	10.4253	8.52074	16.9828	37.4527	9.85804	25.5805	0.0168072	1.04677	Molecular Function: GTPase activity (GO:0003924);; Molecular Function: GTP binding (GO:0005525);;	--	--	Intracellular trafficking, secretion, and vesicular transport;; General function prediction only	Dynamin-related protein 4C OS=Arabidopsis thaliana OX=3702 GN=DRP4C PE=2 SV=1
scaffold6246.4	69.7445	63.0947	61.233	117.057	110.294	85.403	0.0169456	0.72227	Molecular Function: DNA clamp loader activity (GO:0003689);; Molecular Function: ATP binding (GO:0005524);; Cellular Component: DNA replication factor C complex (GO:0005663);; Biological Process: DNA-dependent DNA replication (GO:0006261);; Biological Process: negative regulation of defense response (GO:0031348);;	K10756|3.21604e-176|sind:105155253|K10756 replication factor C subunit 3/5 | (RefSeq) replication factor C subunit 3	DNA replication (ko03030);; Nucleotide excision repair (ko03420);; Mismatch repair (ko03430)	Replication, recombination and repair	Replication factor C subunit 3 OS=Oryza sativa subsp. japonica OX=39947 GN=RFC3 PE=2 SV=1
scaffold4677.5	15.5579	5.14962	17.3543	7.97483	5.41665	2.85553	0.0169702	-1.18131	Molecular Function: ATP binding (GO:0005524);; Biological Process: drug transmembrane transport (GO:0006855);; Molecular Function: xenobiotic-transporting ATPase activity (GO:0008559);; Cellular Component: integral component of membrane (GO:0016021);; Biological Process: xenobiotic transport (GO:0042908);;	K05658|0|sind:105173549|K05658 ATP-binding cassette, subfamily B (MDR/TAP), member 1 [EC:3.6.3.44] | (RefSeq) putative ABC transporter B family member 8	ABC transporters (ko02010)	Secondary metabolites biosynthesis, transport and catabolism	Putative ABC transporter B family member 8 OS=Arabidopsis thaliana OX=3702 GN=ABCB8 PE=5 SV=1
scaffold3049.6	23.7163	17.3464	31.2821	45.979	40.6886	38.204	0.0170758	0.825796	Molecular Function: superoxide dismutase activity (GO:0004784);; Molecular Function: copper ion binding (GO:0005507);; Molecular Function: zinc ion binding (GO:0008270);; Cellular Component: chloroplast stroma (GO:0009570);; Cellular Component: thylakoid (GO:0009579);; Biological Process: removal of superoxide radicals (GO:0019430);; Cellular Component: apoplast (GO:0048046);; Biological Process:…	K04565|4.49265e-94|sind:105169947|K04565 superoxide dismutase, Cu-Zn family [EC:1.15.1.1] | (RefSeq) superoxide dismutase [Cu-Zn], chloroplastic	Peroxisome (ko04146)	Inorganic ion transport and metabolism	Superoxide dismutase [Cu-Zn], chloroplastic OS=Oryza sativa subsp. japonica OX=39947 GN=SODCP PE=1 SV=1
newGene_3002	0.768595	1.51679	4.57102	0.953691	0.012514	0.510373	0.0172549	-2.15149	--	--	--	Signal transduction mechanisms	Putative disease resistance RPP13-like protein 1 OS=Arabidopsis thaliana OX=3702 GN=RPPL1 PE=3 SV=1
C221139.2	46.7751	60.5018	36.5194	74.4458	65.5951	113.326	0.0172674	0.82698	--	--	--	--	Protein EXORDIUM-like 5 OS=Arabidopsis thaliana OX=3702 GN=EXL5 PE=2 SV=1
scaffold10815.10	5.47924	4.3786	5.82301	16.5674	6.2101	7.79054	0.0176459	0.996134	--	--	--	--	LEAF RUST 10 DISEASE-RESISTANCE LOCUS RECEPTOR-LIKE PROTEIN KINASE-like 2.2 OS=Arabidopsis thaliana OX=3702 GN=LRK10L-2.2 PE=3 SV=2
scaffold6457.2	15.4246	36.0187	10.1398	63.187	17.3122	70.8955	0.0178093	1.28513	Molecular Function: glutathione transferase activity (GO:0004364);; Cellular Component: cytoplasm (GO:0005737);; Biological Process: glutathione metabolic process (GO:0006749);; Biological Process: toxin catabolic process (GO:0009407);;	K00799|3.09468e-99|vvi:100264557|K00799 glutathione S-transferase [EC:2.5.1.18] | (RefSeq) probable glutathione S-transferase	Glutathione metabolism (ko00480)	Posttranslational modification, protein turnover, chaperones	Glutathione S-transferase U19 OS=Arabidopsis thaliana OX=3702 GN=GSTU19 PE=1 SV=1
scaffold6637.8	11.6539	15.3909	9.74873	6.1879	4.40683	8.91457	0.0178175	-0.902644	Molecular Function: ATP binding (GO:0005524);; Biological Process: protein folding (GO:0006457);; Molecular Function: 2-alkenal reductase [NAD(P)] activity (GO:0032440);; Molecular Function: unfolded protein binding (GO:0051082);; Biological Process: oxidation-reduction process (GO:0055114);;	K03283|0|sind:105175877|K03283 heat shock 70kDa protein 1/8 | (RefSeq) stromal 70 kDa heat shock-related protein, chloroplastic-like	--	Posttranslational modification, protein turnover, chaperones	Stromal 70 kDa heat shock-related protein, chloroplastic OS=Pisum sativum OX=3888 GN=HSP70 PE=2 SV=1
scaffold5192.1	28.2165	13.2346	25.886	12.9533	8.08338	13.5476	0.0182375	-0.924484	--	--	--	Posttranslational modification, protein turnover, chaperones	Protein SMAX1-LIKE 5 OS=Arabidopsis thaliana OX=3702 GN=SMXL5 PE=2 SV=1
scaffold194.8	6.2133	5.53308	6.51317	2.73331	4.37748	3.23307	0.0182656	-0.787825	--	--	--	--	--
scaffold5029.9	10.8382	8.31901	4.44041	33.1385	12.0549	9.01302	0.0188881	1.25533	Molecular Function: aspartic-type endopeptidase activity (GO:0004190);; Biological Process: proteolysis (GO:0006508);; Biological Process: protein catabolic process (GO:0030163);; Molecular Function: carbohydrate binding (GO:0030246);;	--	--	Posttranslational modification, protein turnover, chaperones	Protein ASPARTIC PROTEASE IN GUARD CELL 1 OS=Arabidopsis thaliana OX=3702 GN=ASPG1 PE=1 SV=1
scaffold7279.9	0.261559	0.825169	6.3364	10.1142	10.6532	6.10064	0.018898	1.9248	--	--	--	--	--
newGene_19539	5.80423	4.2228	2.75688	9.11336	8.32476	5.9685	0.0192233	0.899204	--	--	--	--	--
scaffold11315.5	33.1641	13.2654	12.6455	18.9466	31.4558	24.8091	0.0195723	0.847219	Cellular Component: membrane (GO:0016020);;	--	--	Energy production and conversion	Hypersensitive-induced response protein-like protein 1 OS=Oryza sativa subsp. japonica OX=39947 GN=HIRL1 PE=2 SV=1
scaffold11225.4	2.57184	4.26072	2.40641	4.81486	5.41719	10.9532	0.019704	1.18394	--	--	--	General function prediction only	F-box protein At5g67140 OS=Arabidopsis thaliana OX=3702 GN=At5g67140 PE=2 SV=1
newGene_9914	1992.95	747.292	583.104	7380.08	2317.95	562.471	0.0199148	1.57197	Molecular Function: carbohydrate binding (GO:0030246);;	--	--	--	Agglutinin-2 OS=Cladrastis kentukea OX=38412 PE=1 SV=1
C219099.3	6.86935	6.5211	6.23004	10.8792	14.8325	8.38541	0.0199578	0.824201	--	--	--	--	--
newGene_8479	82.0556	77.3132	53.9741	121.592	126.919	103.758	0.0201631	0.741154	Molecular Function: aspartic-type endopeptidase activity (GO:0004190);; Biological Process: proteolysis (GO:0006508);;	--	--	Posttranslational modification, protein turnover, chaperones	Aspartic proteinase Asp1 OS=Oryza sativa subsp. japonica OX=39947 GN=ASP1 PE=2 SV=1
scaffold1777.2	18.2965	31.4725	15.2752	26.7998	61.8426	36.0375	0.0203224	0.949779	--	--	--	--	--
scaffold3122.1	8.33312	37.7635	2.45084	64.5663	28.3029	58.2339	0.0204212	1.59319	Molecular Function: magnesium ion binding (GO:0000287);; Biological Process: metabolic process (GO:0008152);; Molecular Function: terpene synthase activity (GO:0010333);;	--	--	--	Gamma-cadinene synthase OS=Ocimum basilicum OX=39350 GN=CDS PE=1 SV=1
C221631.7	9.21759	10.396	12.2453	7.51072	4.2379	5.79342	0.0211872	-0.832616	Molecular Function: transcription factor activity, sequence-specific DNA binding (GO:0003700);; Biological Process: regulation of transcription, DNA-templated (GO:0006355);; Molecular Function: sequence-specific DNA binding (GO:0043565);;	--	--	--	Probable WRKY transcription factor 72 OS=Arabidopsis thaliana OX=3702 GN=WRKY72 PE=2 SV=1
scaffold7501.11	2.00594	7.65099	1.4224	0.955879	1.65417	0.911572	0.0215535	-1.65435	Biological Process: transcription, DNA-templated (GO:0006351);;	--	--	--	NAC domain-containing protein 46 OS=Arabidopsis thaliana OX=3702 GN=NAC046 PE=1 SV=1
scaffold6083.28	0.415704	1.26264	1.06443	3.49568	1.22633	1.03172	0.0216457	1.47962	--	--	--	--	Probable E3 ubiquitin-protein ligase LUL3 OS=Arabidopsis thaliana OX=3702 GN=LUL3 PE=1 SV=1
scaffold752.47	92.9316	110.388	70.6386	121.892	162.758	170.1	0.0216966	0.745628	--	--	--	Function unknown	--
scaffold12117.1	14.3566	11.1483	13.1211	22.4177	15.974	27.6432	0.0221197	0.824046	--	K07088|4.08453e-157|sind:105178208|K07088 uncharacterized protein | (RefSeq) uncharacterized transporter YBR287W-like	--	Function unknown	Protein PIN-LIKES 5 OS=Arabidopsis thaliana OX=3702 GN=PILS5 PE=2 SV=1
newGene_8494	21.4106	23.7928	19.9364	12.9706	8.31217	15.4171	0.0221843	-0.809448	--	--	--	Signal transduction mechanisms	Disease resistance protein RPP13 OS=Arabidopsis thaliana OX=3702 GN=RPP13 PE=2 SV=2
newGene_15434	4.85405	6.85834	7.08535	2.65117	2.95726	3.73035	0.0223337	-0.904238	--	--	--	Function unknown	--
scaffold3475.5	13.3835	13.4754	12.508	22.4148	18.1471	24.5525	0.0224342	0.746397	Molecular Function: transferase activity, transferring glycosyl groups (GO:0016757);;	--	--	--	Probable galacturonosyltransferase-like 9 OS=Arabidopsis thaliana OX=3702 GN=GATL9 PE=2 SV=1
scaffold4677.3	25.3002	6.87724	27.2963	11.5682	7.0598	4.64922	0.0224924	-1.18439	Molecular Function: ATP binding (GO:0005524);; Cellular Component: integral component of membrane (GO:0016021);; Molecular Function: ATPase activity, coupled to transmembrane movement of substances (GO:0042626);; Biological Process: transmembrane transport (GO:0055085);;	K05658|1.779e-171|sind:105173549|K05658 ATP-binding cassette, subfamily B (MDR/TAP), member 1 [EC:3.6.3.44] | (RefSeq) putative ABC transporter B family member 8	ABC transporters (ko02010)	Secondary metabolites biosynthesis, transport and catabolism	Putative ABC transporter B family member 8 OS=Arabidopsis thaliana OX=3702 GN=ABCB8 PE=5 SV=1
scaffold785.8	33.8742	15.4697	30.5324	18.4064	10.5467	11.0134	0.0225752	-0.837268	Molecular Function: DNA binding (GO:0003677);; Cellular Component: nucleus (GO:0005634);; Biological Process: regulation of transcription, DNA-templated (GO:0006355);;	--	--	Posttranslational modification, protein turnover, chaperones	Transcription factor SRM1 OS=Arabidopsis thaliana OX=3702 GN=SRM1 PE=1 SV=1
newGene_15270	1.35418	1.31957	0.971714	0.776788	0.034461	0.068697	0.0227075	-1.96536	Molecular Function: alpha-amylase activity (GO:0004556);; Molecular Function: calcium ion binding (GO:0005509);; Biological Process: carbohydrate metabolic process (GO:0005975);;	--	--	Carbohydrate transport and metabolism	Alpha-amylase 3, chloroplastic OS=Arabidopsis thaliana OX=3702 GN=AMY3 PE=1 SV=1
scaffold5111.1	47.26	37.7889	57.3949	39.396	20.5949	19.1713	0.0230217	-0.81342	--	--	--	Transcription	--
scaffold8582.4	6.2361	5.61576	7.27646	3.3066	3.23109	3.94822	0.0234488	-0.835926	--	--	--	General function prediction only	--
scaffold1735.8	46.3706	91.4796	33.4834	67.2473	153.102	116.648	0.0235854	0.979229	Molecular Function: DNA binding (GO:0003677);; Molecular Function: transcription factor activity, sequence-specific DNA binding (GO:0003700);; Cellular Component: nucleus (GO:0005634);; Biological Process: regulation of transcription, DNA-templated (GO:0006355);;	--	--	--	Dehydration-responsive element-binding protein 1C OS=Arabidopsis thaliana OX=3702 GN=DREB1C PE=2 SV=2
newGene_7624	68.3835	72.121	97.7465	309.791	98.0938	72.5942	0.0236889	1.04214	--	--	--	--	--
scaffold12259.2	0.256141	0.859045	0.31845	0.418788	6.57697	0.326601	0.0238354	1.66413	--	--	--	--	LEAF RUST 10 DISEASE-RESISTANCE LOCUS RECEPTOR-LIKE PROTEIN KINASE-like 2.5 OS=Arabidopsis thaliana OX=3702 GN=LRK10L-2.5 PE=3 SV=1
scaffold379.10	17.4758	19.4716	13.6985	26.406	25.7395	30.8437	0.023871	0.728748	Molecular Function: protein serine/threonine kinase activity (GO:0004674);; Molecular Function: non-membrane spanning protein tyrosine kinase activity (GO:0004715);; Molecular Function: ATP binding (GO:0005524);; Biological Process: peptidyl-tyrosine phosphorylation (GO:0018108);;	K04733|0|sind:105166638|K04733 interleukin-1 receptor-associated kinase 4 [EC:2.7.11.1] | (RefSeq) serine/threonine-protein kinase CDL1-like	--	Signal transduction mechanisms	Probable serine/threonine-protein kinase PBL7 OS=Arabidopsis thaliana OX=3702 GN=PBL7 PE=1 SV=1
scaffold431.5	169.848	231.342	131.732	245.013	314.206	331.673	0.0239332	0.752668	Cellular Component: integral component of membrane (GO:0016021);; Molecular Function: transferase activity (GO:0016740);;	--	--	--	Probable xyloglucan glycosyltransferase 12 OS=Arabidopsis thaliana OX=3702 GN=CSLC12 PE=1 SV=1
newGene_11207	3.61688	0.939444	8.43785	2.34698	0.756312	0.737298	0.0240057	-1.60629	Biological Process: anthocyanin-containing compound biosynthetic process (GO:0009718);; Molecular Function: transferase activity, transferring acyl groups other than amino-acyl groups (GO:0016747);; Biological Process: pigmentation (GO:0043473);;	--	--	--	Pelargonidin 3-O-(6-caffeoylglucoside) 5-O-(6-O-malonylglucoside) 4&apos;&apos;&apos;-malonyltransferase OS=Salvia splendens OX=180675 PE=1 SV=1
scaffold3123.13	97.8747	55.095	81.7774	61.3887	34.249	39.0123	0.0242467	-0.771985	Molecular Function: transcription cofactor activity (GO:0003712);; Molecular Function: histone acetyltransferase activity (GO:0004402);; Cellular Component: nucleus (GO:0005634);; Biological Process: regulation of transcription, DNA-templated (GO:0006355);; Molecular Function: zinc ion binding (GO:0008270);; Biological Process: histone acetylation (GO:0016573);;	--	--	Transcription	BTB/POZ and TAZ domain-containing protein 1 OS=Arabidopsis thaliana OX=3702 GN=BT1 PE=1 SV=1
scaffold3630.17	6.10482	5.46609	7.46678	3.01065	2.78086	3.37761	0.0242913	-1.02034	--	--	--	General function prediction only	Zinc finger CCCH domain-containing protein 2 OS=Oryza sativa subsp. japonica OX=39947 GN=Os01g0192000 PE=2 SV=1
scaffold3771.63	4.16795	2.28425	3.89671	1.45112	1.61617	1.01153	0.0243382	-1.29185	Molecular Function: DNA binding (GO:0003677);; Molecular Function: transcription factor activity, sequence-specific DNA binding (GO:0003700);; Cellular Component: nucleus (GO:0005634);; Biological Process: regulation of transcription, DNA-templated (GO:0006355);;	K09286|1.27371e-53|sind:105171657|K09286 EREBP-like factor | (RefSeq) ethylene-responsive transcription factor TINY-like	--	--	Ethylene-responsive transcription factor TINY OS=Arabidopsis thaliana OX=3702 GN=TINY PE=2 SV=1
scaffold3588.28	7.0581	4.89784	5.35089	4.23409	2.69381	2.02145	0.0245081	-0.918554	Molecular Function: catalytic activity (GO:0003824);;	K14497|3.17535e-178|sind:105164646|K14497 protein phosphatase 2C [EC:3.1.3.16] | (RefSeq) probable protein phosphatase 2C 53	Plant hormone signal transduction (ko04075)	Signal transduction mechanisms	Protein phosphatase 2C 16 OS=Arabidopsis thaliana OX=3702 GN=HAB1 PE=1 SV=1
scaffold1350.13	2.52149	0.280209	0.062709	2.79557	0	25.5472	0.0245143	3.2973	--	--	--	--	Phylloplanin OS=Nicotiana tabacum OX=4097 PE=1 SV=1
newGene_23394	12.6888	4.30667	13.5347	5.16253	5.1073	3.73184	0.0246417	-1.07332	Molecular Function: transcription factor activity, sequence-specific DNA binding (GO:0003700);; Cellular Component: nucleus (GO:0005634);; Biological Process: regulation of transcription, DNA-templated (GO:0006355);; Molecular Function: sequence-specific DNA binding (GO:0043565);;	K09338|6.65409e-69|sind:105177852|K09338 homeobox-leucine zipper protein | (RefSeq) homeobox-leucine zipper protein HAT22-like	--	Transcription	Homeobox-leucine zipper protein HAT22 OS=Arabidopsis thaliana OX=3702 GN=HAT22 PE=1 SV=1
scaffold12722.16	56.6098	4.53772	74.3512	21.5394	13.2955	6.04766	0.0247733	-1.56672	Biological Process: response to light stimulus (GO:0009416);; Cellular Component: photosystem I (GO:0009522);; Cellular Component: chloroplast thylakoid membrane (GO:0009535);; Biological Process: photosynthesis, light harvesting in photosystem I (GO:0009768);; Cellular Component: chloroplast envelope (GO:0009941);; Cellular Component: plastoglobule (GO:0010287);; Cellular Component: integral com…	K08910|3.02684e-120|rcu:8263414|K08910 light-harvesting complex I chlorophyll a/b binding protein 4 | (RefSeq) chlorophyll a-b binding protein P4, chloroplastic	Photosynthesis - antenna proteins (ko00196)	--	Chlorophyll a-b binding protein 4, chloroplastic OS=Arabidopsis thaliana OX=3702 GN=LHCA4 PE=1 SV=1
scaffold871.16	24.6434	28.159	25.8747	40.098	34.6539	52.4911	0.0249096	0.710916	--	--	--	--	--
newGene_478	13.9367	25.6125	28.9151	15.0939	12.6692	11.3649	0.0249391	-0.863113	--	K13648|3.7186e-50|sind:105175206|K13648 alpha-1,4-galacturonosyltransferase [EC:2.4.1.43] | (RefSeq) probable galacturonosyltransferase 4	Starch and sucrose metabolism (ko00500);; Amino sugar and nucleotide sugar metabolism (ko00520)	--	Probable galacturonosyltransferase 4 OS=Arabidopsis thaliana OX=3702 GN=GAUT4 PE=2 SV=1
scaffold9114.10	1303.55	290.39	1642.37	360.155	380.842	351.3	0.0250138	-0.859736	--	--	--	--	--
C222431.12	42.0724	27.043	14.9987	14.0752	13.5925	17.9765	0.025244	-0.86692	--	K08818|4.41229e-73|sind:105156686|K08818 cell division cycle 2-like [EC:2.7.11.22] | (RefSeq) cyclin-dependent kinase G-2-like	--	General function prediction only	Cyclin-dependent kinase G-2 OS=Oryza sativa subsp. japonica OX=39947 GN=CDKG-2 PE=2 SV=2
scaffold3162.2	2.13871	2.10311	1.4743	2.73785	4.60202	4.86301	0.0254349	1.10555	Biological Process: lipid catabolic process (GO:0016042);; Molecular Function: transferase activity (GO:0016740);; Molecular Function: hydrolase activity (GO:0016787);;	--	--	Lipid transport and metabolism	Patatin-like protein 2 OS=Oryza sativa subsp. japonica OX=39947 GN=PLP2 PE=3 SV=1
scaffold4677.4	29.9584	7.75613	26.4216	14.3158	8.17214	4.15198	0.0254447	-1.20483	Molecular Function: nucleotide binding (GO:0000166);; Biological Process: transport (GO:0006810);; Cellular Component: membrane (GO:0016020);; Molecular Function: ATPase activity (GO:0016887);;	K05658|2.00239e-104|sind:105173549|K05658 ATP-binding cassette, subfamily B (MDR/TAP), member 1 [EC:3.6.3.44] | (RefSeq) putative ABC transporter B family member 8	ABC transporters (ko02010)	Secondary metabolites biosynthesis, transport and catabolism	Putative ABC transporter B family member 8 OS=Arabidopsis thaliana OX=3702 GN=ABCB8 PE=5 SV=1
scaffold720.3	51.229	116.682	39.3144	87.3399	130.789	191.642	0.0255199	0.980081	Molecular Function: zinc ion transmembrane transporter activity (GO:0005385);; Cellular Component: integral component of membrane (GO:0016021);; Molecular Function: 2-alkenal reductase [NAD(P)] activity (GO:0032440);; Biological Process: oxidation-reduction process (GO:0055114);; Biological Process: zinc II ion transmembrane transport (GO:0071577);;	K14709|9.71905e-173|sind:105178589|K14709 solute carrier family 39 (zinc transporter), member 1/2/3 | (RefSeq) zinc transporter 8-like	--	Inorganic ion transport and metabolism	Zinc transporter 5 OS=Arabidopsis thaliana OX=3702 GN=ZIP5 PE=2 SV=1
scaffold12734.1	3.01869	21.6544	3.75251	3.35053	1.82197	4.95173	0.025636	-1.51381	Molecular Function: catalytic activity (GO:0003824);; Molecular Function: pyridoxal phosphate binding (GO:0030170);;	K01761|0|sind:105156049|K01761 methionine-gamma-lyase [EC:4.4.1.11] | (RefSeq) methionine gamma-lyase	Cysteine and methionine metabolism (ko00270);; Selenocompound metabolism (ko00450)	Amino acid transport and metabolism	Methionine gamma-lyase OS=Arabidopsis thaliana OX=3702 GN=MGL PE=1 SV=1
scaffold10200.8	3.27555	3.57241	3.21079	7.38154	6.78775	6.03335	0.0257001	1.02463	--	--	--	--	BON1-associated protein 2 OS=Arabidopsis thaliana OX=3702 GN=BAP2 PE=1 SV=1
scaffold7035.5	3.01451	6.40778	10.5283	2.04068	2.87086	3.00221	0.0257912	-1.28751	--	--	--	--	--
scaffold11975.11	1.41311	1.0114	1.09086	0.633462	0.124812	0.40936	0.0258355	-1.49439	Cellular Component: membrane (GO:0016020);;	--	--	--	--
scaffold1205.8	63.5362	73.0261	41.0644	77.1085	148.668	88.4569	0.0259685	0.824381	Molecular Function: squalene monooxygenase activity (GO:0004506);; Biological Process: response to water deprivation (GO:0009414);; Cellular Component: integral component of membrane (GO:0016021);; Biological Process: sterol biosynthetic process (GO:0016126);; Molecular Function: isomerase activity (GO:0016853);; Molecular Function: flavin adenine dinucleotide binding (GO:0050660);; Biological Pr…	K00511|0|sind:105169793|K00511 squalene monooxygenase [EC:1.14.14.17] | (RefSeq) squalene monooxygenase-like	Steroid biosynthesis (ko00100);; Sesquiterpenoid and triterpenoid biosynthesis (ko00909)	Lipid transport and metabolism	Squalene epoxidase 3 OS=Arabidopsis thaliana OX=3702 GN=SQE3 PE=1 SV=1
scaffold11634.5	4.93578	4.89232	6.32541	2.658	2.12868	2.2019	0.0261725	-1.16737	Cellular Component: membrane (GO:0016020);;	--	--	General function prediction only	--
scaffold4137.12	5.14802	11.4525	4.15844	11.4569	21.3373	12.7641	0.0261806	1.13614	Cellular Component: membrane (GO:0016020);;	--	--	--	NDR1/HIN1-like protein 13 OS=Arabidopsis thaliana OX=3702 GN=NHL13 PE=2 SV=1
newGene_6754	8.6976	11.1089	8.9837	4.94916	4.94464	2.08982	0.0263114	-1.2372	Molecular Function: threonine-type endopeptidase activity (GO:0004298);; Cellular Component: nucleus (GO:0005634);; Cellular Component: cytoplasm (GO:0005737);; Cellular Component: proteasome core complex (GO:0005839);; Biological Process: proteolysis involved in cellular protein catabolic process (GO:0051603);;	K02738|1.14027e-32|sind:105173855|K02738 20S proteasome subunit beta 1 [EC:3.4.25.1] | (RefSeq) proteasome subunit beta type-6-like	Proteasome (ko03050)	Posttranslational modification, protein turnover, chaperones	Proteasome subunit beta type-6 OS=Arabidopsis thaliana OX=3702 GN=PBA1 PE=1 SV=2
scaffold12658.17	2.00384	2.02261	0.995172	7.39126	3.90099	1.57494	0.0263874	1.36684	--	--	--	Inorganic ion transport and metabolism	SPX domain-containing protein 3 OS=Arabidopsis thaliana OX=3702 GN=SPX3 PE=2 SV=1
scaffold3671.12	0.184013	1.6678	0.052075	4.09654	0.052438	6.63776	0.0264822	2.49804	Molecular Function: protein kinase activity (GO:0004672);; Cellular Component: membrane (GO:0016020);;	K04733|0|sind:105175426|K04733 interleukin-1 receptor-associated kinase 4 [EC:2.7.11.1] | (RefSeq) cysteine-rich receptor-like protein kinase 10	--	--	Cysteine-rich receptor-like protein kinase 8 OS=Arabidopsis thaliana OX=3702 GN=CRK8 PE=3 SV=2
scaffold839.6	0.779489	8.55876	1.31612	0.830137	0.950513	1.87242	0.0265215	-1.69675	Molecular Function: ion channel activity (GO:0005216);; Biological Process: potassium ion transport (GO:0006813);; Cellular Component: membrane (GO:0016020);; Biological Process: ion transmembrane transport (GO:0034220);;	K05391|7.81833e-173|sind:105174362|K05391 cyclic nucleotide gated channel, other eukaryote | (RefSeq) putative cyclic nucleotide-gated ion channel 15	Plant-pathogen interaction (ko04626)	Inorganic ion transport and metabolism;; Signal transduction mechanisms	Protein CNGC15a OS=Medicago truncatula OX=3880 GN=CNGC15A PE=1 SV=1
scaffold560.15	48.1747	13.4184	34.8192	21.3312	15.3539	4.07478	0.0265472	-1.19718	Biological Process: response to stress (GO:0006950);; Biological Process: cellular process (GO:0009987);; Biological Process: single-organism process (GO:0044699);;	K14506|0|spen:107002523|K14506 jasmonic acid-amino synthetase | (RefSeq) jasmonic acid-amido synthetase JAR1-like	Plant hormone signal transduction (ko04075)	--	Jasmonic acid-amido synthetase JAR1 OS=Oryza sativa subsp. japonica OX=39947 GN=GH3.5 PE=2 SV=1
C219809.2	2.48825	5.17542	2.89206	7.80082	6.07057	8.64113	0.0265616	1.09809	--	--	--	--	--
scaffold9212.4	1.7528	1.62765	4.52709	1.27342	1.01965	0.967878	0.0268766	-1.15623	--	K03549|0|sind:105160388|K03549 KUP system potassium uptake protein | (RefSeq) potassium transporter 26-like	--	--	Potassium transporter 26 OS=Oryza sativa subsp. japonica OX=39947 GN=HAK26 PE=2 SV=1
scaffold871.17	53.1009	59.7697	47.3903	80.9632	88.211	81.8477	0.027263	0.666937	--	--	--	General function prediction only	Probable plastid-lipid-associated protein 14, chloroplastic OS=Arabidopsis thaliana OX=3702 GN=PAP14 PE=1 SV=1
C218563.1	1.71932	1.68651	3.77815	24.554	1.25961	1.31162	0.0273264	1.95249	Cellular Component: integral component of membrane (GO:0016021);;	K12669|5.352e-82|sind:105167971|K12669 oligosaccharyltransferase complex subunit gamma | (RefSeq) probable dolichyl-diphosphooligosaccharide--protein glycosyltransferase subunit 3B	N-Glycan biosynthesis (ko00510);; Protein processing in endoplasmic reticulum (ko04141)	Posttranslational modification, protein turnover, chaperones	Probable dolichyl-diphosphooligosaccharide--protein glycosyltransferase subunit 3 OS=Oryza sativa subsp. japonica OX=39947 GN=OST3 PE=2 SV=1
scaffold12000.4	28.0807	19.6838	40.4123	20.705	13.4795	16.4199	0.0273577	-0.769874	--	--	--	--	Protein SULFUR DEFICIENCY-INDUCED 2 OS=Arabidopsis thaliana OX=3702 GN=At1g04770 PE=2 SV=1
scaffold5192.2	14.0149	6.46718	15.1236	6.94914	5.247	7.48353	0.0276454	-0.814555	--	--	--	Posttranslational modification, protein turnover, chaperones	Protein SMAX1-LIKE 4 OS=Arabidopsis thaliana OX=3702 GN=SMXL4 PE=1 SV=1
newGene_5469	1.48799	3.27144	1.76431	2.62275	2.38579	8.61802	0.0276593	1.19542	Molecular Function: protein serine/threonine kinase activity (GO:0004674);; Molecular Function: transmembrane receptor protein tyrosine kinase activity (GO:0004714);; Molecular Function: ATP binding (GO:0005524);; Cellular Component: integral component of membrane (GO:0016021);; Biological Process: peptidyl-tyrosine phosphorylation (GO:0018108);;	--	--	Signal transduction mechanisms	Proline-rich receptor-like protein kinase PERK1 OS=Arabidopsis thaliana OX=3702 GN=PERK1 PE=1 SV=1
scaffold7981.25	21.655	21.247	20.2696	9.98086	11.5716	16.0353	0.027681	-0.721635	--	--	--	--	--
scaffold2589.3	24.519	45.6251	20.0458	33.8705	61.3706	74.564	0.0276987	0.914999	--	--	--	General function prediction only	Protein C2-DOMAIN ABA-RELATED 7 OS=Arabidopsis thaliana OX=3702 GN=CAR7 PE=1 SV=1
scaffold11122.3	11.2552	21.3716	24.7936	7.03707	6.23933	14.4138	0.0279064	-1.02613	Biological Process: response to nitrate (GO:0010167);; Biological Process: nitrate transport (GO:0015706);; Cellular Component: integral component of membrane (GO:0016021);;	--	--	--	High-affinity nitrate transporter 3.1 OS=Arabidopsis thaliana OX=3702 GN=NRT3.1 PE=1 SV=1
scaffold2486.5	11.4701	11.1522	7.22638	13.511	11.7681	30.6043	0.0282337	0.915271	Molecular Function: monooxygenase activity (GO:0004497);; Molecular Function: iron ion binding (GO:0005506);; Cellular Component: integral component of membrane (GO:0016021);; Molecular Function: oxidoreductase activity, acting on paired donors, with incorporation or reduction of molecular oxygen (GO:0016705);; Molecular Function: heme binding (GO:0020037);; Biological Process: oxidation-reductio…	--	--	Secondary metabolites biosynthesis, transport and catabolism;; Lipid transport and metabolism	Cytochrome P450 714C2 OS=Oryza sativa subsp. japonica OX=39947 GN=CYP714C2 PE=2 SV=1
scaffold6839.17	1.97862	1.70299	2.85151	3.88986	3.55037	3.87779	0.0282388	0.809708	Molecular Function: monooxygenase activity (GO:0004497);; Molecular Function: iron ion binding (GO:0005506);; Cellular Component: integral component of membrane (GO:0016021);; Molecular Function: oxidoreductase activity, acting on paired donors, with incorporation or reduction of molecular oxygen (GO:0016705);; Molecular Function: heme binding (GO:0020037);; Biological Process: oxidation-reductio…	--	--	Secondary metabolites biosynthesis, transport and catabolism	Cytochrome P450 76A1 (Fragment) OS=Solanum melongena OX=4111 GN=CYP76A1 PE=2 SV=1
scaffold7135.8	30.0209	66.9111	24.8877	50.406	76.7338	107.145	0.0283755	0.942184	--	--	--	--	Ethylene-responsive transcription factor ERF012 OS=Arabidopsis thaliana OX=3702 GN=ERF012 PE=2 SV=1
scaffold938.2	20.5635	12.43	17.1762	7.23409	10.1927	8.19549	0.0285067	-0.93391	--	--	--	--	--
newGene_4312	0.17794	0.185883	0	0.410116	0.418455	0.536561	0.028565	1.83782	--	K04733|0|sind:105177535|K04733 interleukin-1 receptor-associated kinase 4 [EC:2.7.11.1] | (RefSeq) putative wall-associated receptor kinase-like 16	--	--	Wall-associated receptor kinase 3 OS=Arabidopsis thaliana OX=3702 GN=WAK3 PE=2 SV=2
scaffold4813.6	7.69411	5.60287	7.38079	12.0138	14.09	9.45347	0.0288372	0.792021	Cellular Component: membrane (GO:0016020);;	K14638|1.04902e-65|sind:105174544|K14638 solute carrier family 15 (peptide/histidine transporter), member 3/4 | (RefSeq) protein NRT1/ PTR FAMILY 5.5-like	--	Amino acid transport and metabolism	Protein NRT1/ PTR FAMILY 5.5 OS=Arabidopsis thaliana OX=3702 GN=NPF5.5 PE=2 SV=1
scaffold3260.14	3.48446	2.62268	4.91647	0.999313	1.45636	2.07045	0.0295656	-1.2443	--	--	--	--	--
scaffold8299.6	12.705	24.7983	12.6027	18.6258	44.4022	32.9032	0.0295918	0.946917	Cellular Component: membrane (GO:0016020);;	--	--	--	--
C221085.11	10.1615	23.9979	8.94138	18.0165	26.5154	39.3649	0.0297299	0.95886	Molecular Function: zinc ion transmembrane transporter activity (GO:0005385);; Cellular Component: integral component of membrane (GO:0016021);; Biological Process: zinc II ion transmembrane transport (GO:0071577);;	K14709|1.87412e-126|sind:105178589|K14709 solute carrier family 39 (zinc transporter), member 1/2/3 | (RefSeq) zinc transporter 8-like	--	Inorganic ion transport and metabolism	Zinc transporter 5 OS=Arabidopsis thaliana OX=3702 GN=ZIP5 PE=2 SV=1
scaffold12326.1	7.77208	10.8621	8.91894	17.8836	12.5311	19.0628	0.0300132	0.804191	Molecular Function: protein serine/threonine kinase activity (GO:0004674);; Molecular Function: ATP binding (GO:0005524);; Biological Process: protein phosphorylation (GO:0006468);;	--	--	Signal transduction mechanisms	Calmodulin-binding receptor-like cytoplasmic kinase 3 OS=Arabidopsis thaliana OX=3702 GN=CRCK3 PE=2 SV=1
scaffold1463.6	27.4627	16.2056	23.5278	14.9845	6.67618	11.0024	0.0301989	-1.00635	--	--	--	--	--
scaffold9509.1	2.72174	0.470739	8.10999	1.4914	0.641962	0.97797	0.0305823	-1.75705	Cellular Component: membrane (GO:0016020);; Molecular Function: oxidoreductase activity, acting on paired donors, with incorporation or reduction of molecular oxygen, NAD(P)H as one donor, and incorporation of one atom of oxygen (GO:0016709);; Biological Process: secondary metabolite biosynthetic process (GO:0044550);; Molecular Function: metal ion binding (GO:0046872);;	K20618|5.82336e-124|sind:105174219|K20618 cytochrome P450 family 76 subfamily A | (RefSeq) cytochrome P450 76A2-like	--	Secondary metabolites biosynthesis, transport and catabolism	Cytochrome P450 76A2 OS=Solanum melongena OX=4111 GN=CYP76A2 PE=2 SV=1
newGene_9994	9.98646	8.69496	8.83601	5.14865	6.00466	4.27949	0.0309828	-0.807826	--	--	--	--	--
C222149.4	13.5922	12.9347	17.2189	9.71531	4.83514	10.0249	0.0309995	-0.803583	--	--	--	--	BTB/POZ domain-containing protein At5g60050 OS=Arabidopsis thaliana OX=3702 GN=At5g60050 PE=2 SV=1
C218721.1	1.87885	0.358719	1.35562	2.93961	1.68466	3.28074	0.0311855	1.17626	Molecular Function: DNA binding (GO:0003677);; Cellular Component: nucleus (GO:0005634);; Molecular Function: oxidoreductase activity (GO:0016491);; Biological Process: histone deacetylation (GO:0016575);; Biological Process: histone H3-K4 methylation (GO:0051568);; Biological Process: oxidation-reduction process (GO:0055114);;	K11450|0|sind:105172609|K11450 lysine-specific histone demethylase 1A [EC:1.-.-.-] | (RefSeq) lysine-specific histone demethylase 1 homolog 1	--	Secondary metabolites biosynthesis, transport and catabolism	Lysine-specific histone demethylase 1 homolog 1 OS=Arabidopsis thaliana OX=3702 GN=LDL1 PE=1 SV=1
scaffold9778.1	168.732	131.508	106.44	77.3522	73.7426	95.542	0.0312344	-0.683761	--	--	--	--	Glycine-rich domain-containing protein 2 OS=Arabidopsis thaliana OX=3702 GN=GRDP2 PE=2 SV=1
C222313.14	39.8182	5.96095	23.3061	19.6758	4.37661	4.07599	0.0314288	-1.35675	Molecular Function: protein dimerization activity (GO:0046983);;	--	--	--	Transcription factor bHLH25 OS=Arabidopsis thaliana OX=3702 GN=BHLH25 PE=2 SV=2
scaffold4901.2	8.0889	7.32104	12.0214	5.46539	5.82382	4.90202	0.0315286	-0.725581	--	--	--	General function prediction only	Serine/threonine-protein kinase KIPK1 OS=Arabidopsis thaliana OX=3702 GN=KIPK1 PE=1 SV=1
scaffold298.2	5.43181	6.08847	5.74784	9.547	6.80107	14.4862	0.0315377	0.846353	--	--	--	--	--
newGene_21348	10.7308	17.3176	13.8823	30.7609	19.2751	19.9774	0.0315693	0.757119	Biological Process: transport (GO:0006810);; Cellular Component: membrane (GO:0016020);;	K14638|1.06897e-153|jcu:105643995|K14638 solute carrier family 15 (peptide/histidine transporter), member 3/4 | (RefSeq) protein NRT1/ PTR FAMILY 5.10-like	--	Amino acid transport and metabolism	Protein NRT1/ PTR FAMILY 5.10 OS=Arabidopsis thaliana OX=3702 GN=NPF5.10 PE=2 SV=1
scaffold10270.2	37.5841	86.4736	44.4081	66.8119	93.9849	148.252	0.0318103	0.880383	--	--	--	--	--
scaffold8926.1	2.44505	2.36319	21.5618	1.71924	3.82221	2.46657	0.0319153	-1.62953	Molecular Function: structural constituent of ribosome (GO:0003735);; Cellular Component: ribosome (GO:0005840);; Biological Process: translation (GO:0006412);;	K02962|3.81115e-86|sind:105174013|K02962 small subunit ribosomal protein S17e | (RefSeq) 40S ribosomal protein S17-like	Ribosome (ko03010)	Translation, ribosomal structure and biogenesis	40S ribosomal protein S17-4 OS=Arabidopsis thaliana OX=3702 GN=RPS17D PE=2 SV=3
scaffold1350.8	5.96751	9.18543	6.93936	12.1009	11.972	10.886	0.0319457	0.699314	Biological Process: mitotic chromosome condensation (GO:0007076);;	K11491|0|sind:105171597|K11491 condensin-2 complex subunit D3 | (RefSeq) condensin-2 complex subunit D3	--	Function unknown	Chaperone protein dnaJ 49 OS=Arabidopsis thaliana OX=3702 GN=ATJ49 PE=2 SV=2
scaffold6945.2	5.84117	3.43099	4.31581	2.50408	2.16137	1.50017	0.0319722	-1.10604	--	--	--	General function prediction only	CEN-like protein 2 OS=Nicotiana tabacum OX=4097 GN=CET2 PE=2 SV=1
scaffold12226.4	0.835455	0.916352	1.59763	0.212622	0.650672	0.385424	0.0322226	-1.35082	Biological Process: metabolic process (GO:0008152);; Molecular Function: oxidoreductase activity (GO:0016491);;	K00279|1.38622e-110|sly:101255039|K00279 cytokinin dehydrogenase [EC:1.5.99.12] | (RefSeq) SlCKX8; cytokinin dehydrogenase 3	Zeatin biosynthesis (ko00908)	Energy production and conversion	Cytokinin dehydrogenase 3 OS=Arabidopsis thaliana OX=3702 GN=CKX3 PE=1 SV=1
scaffold375.1	0.334459	0.342276	0.636599	0.762157	1.14318	1.12657	0.0322611	1.32012	--	--	--	--	Putative late blight resistance protein homolog R1A-6 OS=Solanum demissum OX=50514 GN=R1A-6 PE=3 SV=2
scaffold3992.21	2.15506	11.3097	2.09862	0.890622	1.66766	2.32412	0.032285	-1.67078	Cellular Component: nucleus (GO:0005634);;	--	--	--	--
scaffold6334.9	0.54961	0.036786	0.216088	1.90586	0.448164	0.450543	0.0323499	1.80666	--	K17756|3.62708e-45|sind:105157636|K17756 long-chain-alcohol oxidase [EC:1.1.3.20] | (RefSeq) long-chain-alcohol oxidase FAO4A-like	--	--	Long-chain-alcohol oxidase FAO4A OS=Arabidopsis thaliana OX=3702 GN=FAO4A PE=3 SV=2
newGene_15595	3.2454	3.54408	5.51685	0	1.48334	0	0.0324551	-2.98634	--	--	--	Signal transduction mechanisms	Putative late blight resistance protein homolog R1C-3 OS=Solanum demissum OX=50514 GN=R1C-3 PE=3 SV=1
newGene_19192	5.91388	2.62416	4.93926	2.10518	1.85928	2.31067	0.0326341	-1.06185	Molecular Function: catalytic activity (GO:0003824);; Biological Process: metabolic process (GO:0008152);;	--	--	--	Probably inactive leucine-rich repeat receptor-like protein kinase At2g25790 OS=Arabidopsis thaliana OX=3702 GN=At2g25790 PE=2 SV=1
C214535.3	83.7041	94.8694	57.9054	107.903	125.124	146.869	0.0330618	0.698892	Molecular Function: protein kinase activity (GO:0004672);; Molecular Function: ATP binding (GO:0005524);; Biological Process: protein phosphorylation (GO:0006468);;	--	--	Signal transduction mechanisms	Serine/threonine-protein kinase RIPK OS=Arabidopsis thaliana OX=3702 GN=RIPK PE=1 SV=1
scaffold8423.13	9.14439	5.32763	10.3781	4.97912	5.10869	3.96658	0.0331101	-0.770158	Molecular Function: protein kinase activity (GO:0004672);; Molecular Function: ATP binding (GO:0005524);; Biological Process: protein phosphorylation (GO:0006468);; Biological Process: response to stress (GO:0006950);;	--	--	--	Receptor-like cytosolic serine/threonine-protein kinase RBK2 OS=Arabidopsis thaliana OX=3702 GN=RBK2 PE=1 SV=1
newGene_17439	1.43634	2.5928	1.20345	2.87428	4.07145	4.93197	0.0332547	1.18666	--	--	--	--	Dirigent protein 21 OS=Arabidopsis thaliana OX=3702 GN=DIR21 PE=3 SV=1
scaffold194.16	14.5973	8.02714	15.6717	6.94169	5.36043	9.309	0.0334421	-0.775446	--	--	--	General function prediction only	F-box/kelch-repeat protein At1g67480 OS=Arabidopsis thaliana OX=3702 GN=At1g67480 PE=2 SV=1
scaffold7976.3	5.32023	6.827	6.22619	11.4376	6.5958	14.2191	0.0335322	0.829893	--	--	--	--	Polygalacturonase 1 beta-like protein 3 OS=Arabidopsis thaliana OX=3702 GN=PGL3 PE=2 SV=2
scaffold11909.2	0.710561	0.483121	1.01168	2.2776	1.42995	0.880224	0.0335601	1.09825	--	--	--	Function unknown	Protein TORNADO 1 OS=Arabidopsis thaliana OX=3702 GN=TRN1 PE=2 SV=1
C222345.4	32.3727	34.0424	32.7247	60.64	54.064	39.5888	0.0337798	0.662803	Molecular Function: protein kinase activity (GO:0004672);;	K04733|0|sind:105161988|K04733 interleukin-1 receptor-associated kinase 4 [EC:2.7.11.1] | (RefSeq) serine/threonine-protein kinase At5g01020	--	Signal transduction mechanisms	Probable serine/threonine-protein kinase PBL17 OS=Arabidopsis thaliana OX=3702 GN=PBL17 PE=1 SV=1
scaffold3984.1	2.2429	2.27819	3.1207	1.64793	0.479715	1.00643	0.0339151	-1.25031	Biological Process: response to water deprivation (GO:0009414);; Molecular Function: protein dimerization activity (GO:0046983);;	--	--	--	Transcription factor bHLH137 OS=Arabidopsis thaliana OX=3702 GN=BHLH137 PE=1 SV=1
scaffold9436.13	38.2154	15.9603	32.5795	19.2469	16.8654	11.9387	0.0339454	-0.863435	Molecular Function: catalytic activity (GO:0003824);;	--	--	Signal transduction mechanisms	Probable protein phosphatase 2C 73 OS=Arabidopsis thaliana OX=3702 GN=PPC6-7 PE=2 SV=1
scaffold3401.9	63.072	43.4697	49.4746	74.7912	88.1124	78.2846	0.034002	0.641438	Molecular Function: calmodulin binding (GO:0005516);; Biological Process: response to stress (GO:0006950);;	--	--	--	Calmodulin-binding protein 60 C OS=Arabidopsis thaliana OX=3702 GN=CBP60C PE=2 SV=1
scaffold1240.4	12.9693	8.0501	4.46705	4.23582	4.63279	3.16262	0.0345306	-1.02609	Cellular Component: plasma membrane (GO:0005886);;	K00547|6.50406e-177|sind:105171316|K00547 homocysteine S-methyltransferase [EC:2.1.1.10] | (RefSeq) homocysteine S-methyltransferase 2	Cysteine and methionine metabolism (ko00270)	Amino acid transport and metabolism	Homocysteine S-methyltransferase 3 OS=Arabidopsis thaliana OX=3702 GN=HMT3 PE=1 SV=2
scaffold7823.20	9.29212	24.652	8.93224	13.9036	29.0769	45.5486	0.0346939	1.04286	Molecular Function: aspartic-type endopeptidase activity (GO:0004190);; Biological Process: proteolysis (GO:0006508);; Biological Process: protein catabolic process (GO:0030163);;	--	--	Posttranslational modification, protein turnover, chaperones	Aspartic proteinase PCS1 OS=Arabidopsis thaliana OX=3702 GN=PCS1 PE=2 SV=1
scaffold11720.5	7.25894	6.84665	8.48372	11.6808	9.97494	12.6016	0.0348042	0.662237	--	--	--	--	--
scaffold12337.1	4.17461	0.034071	2.84071	23.5769	12.5864	0.312066	0.0350405	2.36347	Molecular Function: acid phosphatase activity (GO:0003993);; Biological Process: dephosphorylation (GO:0016311);;	--	--	--	Acid phosphatase 1 OS=Solanum lycopersicum OX=4081 GN=APS1 PE=2 SV=1
scaffold5111.5	3.54544	7.00543	6.63452	2.51758	3.71684	2.43287	0.0352449	-0.956149	--	--	--	Transcription	Trihelix transcription factor GTL1 OS=Arabidopsis thaliana OX=3702 GN=GTL1 PE=1 SV=2
C222429.6	2.96587	3.53883	3.15077	3.00403	3.43207	18.7928	0.0353816	1.37411	Molecular Function: aspartic-type endopeptidase activity (GO:0004190);; Biological Process: proteolysis (GO:0006508);; Cellular Component: integral component of membrane (GO:0016021);; Biological Process: protein catabolic process (GO:0030163);;	--	--	Posttranslational modification, protein turnover, chaperones	Aspartyl protease family protein At5g10770 OS=Arabidopsis thaliana OX=3702 GN=At5g10770 PE=2 SV=1
newGene_15552	6.01802	1.0339	17.0746	0.841474	4.84913	0.47283	0.0353854	-1.88393	Cellular Component: endoplasmic reticulum (GO:0005783);; Molecular Function: lipid binding (GO:0008289);; Cellular Component: integral component of membrane (GO:0016021);;	--	--	General function prediction only	Synaptotagmin-1 OS=Arabidopsis thaliana OX=3702 GN=SYT1 PE=1 SV=2
scaffold12054.5	14.0066	10.6377	10.338	0.519382	5.72053	6.75222	0.0354053	-1.40068	Molecular Function: transcription factor activity, sequence-specific DNA binding (GO:0003700);; Cellular Component: nucleus (GO:0005634);; Biological Process: regulation of transcription, DNA-templated (GO:0006355);; Biological Process: cell differentiation (GO:0030154);; Molecular Function: sequence-specific DNA binding (GO:0043565);; Biological Process: regulation of shoot system development (G…	--	--	--	Scarecrow-like protein 15 OS=Arabidopsis thaliana OX=3702 GN=SCL15 PE=1 SV=3
newGene_9817	1.67246	0.469046	2.23701	0.439147	0.754852	0.317874	0.0355898	-1.46689	Cellular Component: integral component of membrane (GO:0016021);;	--	--	--	Thaumatin-like protein 1 OS=Arabidopsis thaliana OX=3702 GN=TLP1 PE=2 SV=1
scaffold4374.6	130.374	136.859	122.404	70.5886	88.3463	84.4227	0.0356634	-0.656449	Molecular Function: copper ion transmembrane transporter activity (GO:0005375);; Cellular Component: late endosome (GO:0005770);; Cellular Component: vacuolar membrane (GO:0005774);; Cellular Component: Golgi apparatus (GO:0005794);; Cellular Component: plasmodesma (GO:0009506);; Biological Process: response to abscisic acid (GO:0009737);; Biological Process: intracellular copper ion transport (G…	K14686|2.61582e-27|sind:105164599|K14686 solute carrier family 31 (copper transporter), member 1 | (RefSeq) copper transporter 5	--	Inorganic ion transport and metabolism	Copper transporter 5 OS=Arabidopsis thaliana OX=3702 GN=COPT5 PE=1 SV=1
scaffold4871.1	1.4132	1.40024	1.76424	5.29652	3.00219	1.4279	0.0358155	1.11992	Cellular Component: integral component of membrane (GO:0016021);;	--	--	--	Protein trichome birefringence OS=Arabidopsis thaliana OX=3702 GN=TBR PE=1 SV=1
scaffold6322.1	2.45556	1.47727	4.42646	0.47485	0.994834	1.52958	0.03586	-1.41214	Molecular Function: polygalacturonase activity (GO:0004650);; Cellular Component: extracellular region (GO:0005576);; Biological Process: carbohydrate metabolic process (GO:0005975);; Biological Process: cell wall organization (GO:0071555);;	K01184|1.86446e-93|sind:105158817|K01184 polygalacturonase [EC:3.2.1.15] | (RefSeq) polygalacturonase-like	Pentose and glucuronate interconversions (ko00040);; Starch and sucrose metabolism (ko00500)	--	Polygalacturonase OS=Prunus persica OX=3760 PE=2 SV=1
scaffold12205.1	2.80888	3.84968	3.39819	1.20182	1.98334	1.68617	0.0359407	-1.07106	Molecular Function: phosphoribosylglycinamide formyltransferase activity (GO:0004644);; Biological Process: 'de novo' IMP biosynthetic process (GO:0006189);;	K00601|3.7443e-155|sind:105175282|K00601 phosphoribosylglycinamide formyltransferase [EC:2.1.2.2] | (RefSeq) phosphoribosylglycinamide formyltransferase, chloroplastic-like	Purine metabolism (ko00230);; One carbon pool by folate (ko00670)	Carbohydrate transport and metabolism	Phosphoribosylglycinamide formyltransferase, chloroplastic OS=Vigna unguiculata OX=3917 GN=PUR3 PE=2 SV=2
newGene_15054	3.97079	3.27015	5.78479	2.01121	1.82249	1.53149	0.0359668	-1.22665	--	--	--	Signal transduction mechanisms	Disease resistance protein RPP8 OS=Arabidopsis thaliana OX=3702 GN=RPP8 PE=1 SV=2
newGene_2281	2274.25	579.685	551.777	10460.1	3700.08	57.886	0.0361694	2.08535	--	--	--	--	Agglutinin-2 OS=Cladrastis kentukea OX=38412 PE=1 SV=1
newGene_3189	2.74924	3.49943	3.74336	5.24136	2.10076	17.9154	0.0363725	1.32631	--	--	--	--	Dirigent protein 11 OS=Arabidopsis thaliana OX=3702 GN=DIR11 PE=2 SV=1
scaffold2719.2	14.7792	9.21224	9.45045	3.72988	5.20119	5.6397	0.0363805	-1.11466	Molecular Function: serine-type endopeptidase inhibitor activity (GO:0004867);; Biological Process: response to wounding (GO:0009611);; Biological Process: negative regulation of endopeptidase activity (GO:0010951);;	--	--	--	Proteinase inhibitor OS=Linum usitatissimum OX=4006 PE=1 SV=1
scaffold12533.9	12.7167	11.7659	18.5263	7.14527	7.95383	8.95444	0.0364547	-0.803169	Cellular Component: integral component of membrane (GO:0016021);;	--	--	Intracellular trafficking, secretion, and vesicular transport	PRA1 family protein F2 OS=Arabidopsis thaliana OX=3702 GN=PRA1F2 PE=1 SV=1
newGene_15213	39.2619	43.8603	28.6822	23.3846	12.387	28.4911	0.036475	-0.783417	--	--	--	--	Isoflavone reductase homolog TP7 OS=Nicotiana tabacum OX=4097 GN=TP7 PE=1 SV=1
C214599.2	63.7481	99.0215	45.6071	86.7025	132.964	133.106	0.0368029	0.766505	Molecular Function: nucleic acid binding (GO:0003676);; Cellular Component: nucleus (GO:0005634);; Molecular Function: transferase activity (GO:0016740);;	K12581|1.18347e-148|sind:105171022|K12581 CCR4-NOT transcription complex subunit 7/8 | (RefSeq) probable CCR4-associated factor 1 homolog 11	RNA degradation (ko03018)	RNA processing and modification	Probable CCR4-associated factor 1 homolog 11 OS=Arabidopsis thaliana OX=3702 GN=CAF1-11 PE=2 SV=1
newGene_6404	10.4569	11.3192	10.3703	4.56563	8.88786	3.47777	0.0368559	-0.82933	--	--	--	General function prediction only	Receptor-like protein Cf-9 homolog OS=Solanum lycopersicum OX=4081 GN=HCR9-0 PE=2 SV=2
newGene_6549	1.49179	5.55116	0.987705	3.59946	7.74129	7.61715	0.0368782	1.22441	Biological Process: defense response (GO:0006952);; Molecular Function: ADP binding (GO:0043531);;	K13457|0|sind:105175167|K13457 disease resistance protein RPM1 | (RefSeq) disease resistance protein RPM1-like	Plant-pathogen interaction (ko04626)	Signal transduction mechanisms	Disease resistance protein RPM1 OS=Arabidopsis thaliana OX=3702 GN=RPM1 PE=1 SV=1
newGene_16160	5.38008	21.6486	6.08941	6.38235	4.58877	3.96067	0.0370312	-1.1551	Molecular Function: binding (GO:0005488);; Biological Process: metabolic process (GO:0008152);; Biological Process: cellular process (GO:0009987);; Molecular Function: oxidoreductase activity (GO:0016491);; Biological Process: response to stimulus (GO:0050896);;	K00430|8.90653e-149|sot:102594314|K00430 peroxidase [EC:1.11.1.7] | (RefSeq) peroxidase 2-like	Phenylpropanoid biosynthesis (ko00940)	--	Cationic peroxidase 1 OS=Arachis hypogaea OX=3818 GN=PNC1 PE=1 SV=2
scaffold12601.1	14.3812	26.9489	21.8212	15.2593	5.07203	13.6638	0.0371157	-0.879026	Molecular Function: ATP binding (GO:0005524);; Cellular Component: mitochondrion (GO:0005739);; Molecular Function: zinc ion binding (GO:0008270);; Molecular Function: pyridoxal phosphate binding (GO:0030170);; Molecular Function: cysteine desulfurase activity (GO:0031071);; Biological Process: [2Fe-2S] cluster assembly (GO:0044571);;	K04487|0|sind:105177856|K04487 cysteine desulfurase [EC:2.8.1.7] | (RefSeq) cysteine desulfurase 1, mitochondrial	Thiamine metabolism (ko00730);; Sulfur relay system (ko04122)	Amino acid transport and metabolism	Cysteine desulfurase, mitochondrial OS=Arabidopsis thaliana OX=3702 GN=NIFS1 PE=1 SV=1
scaffold1033.11	1.9216	2.16474	1.2258	4.68756	5.98731	1.50516	0.0373183	1.21121	Molecular Function: DNA binding (GO:0003677);; Molecular Function: transcription factor activity, sequence-specific DNA binding (GO:0003700);; Cellular Component: nucleus (GO:0005634);; Biological Process: regulation of transcription, DNA-templated (GO:0006355);;	K09286|4.24444e-74|sot:102577707|K09286 EREBP-like factor | (RefSeq) CBF3; AP2 domain CBF protein	--	--	Dehydration-responsive element-binding protein 1A OS=Arabidopsis thaliana OX=3702 GN=DREB1A PE=1 SV=2
scaffold3790.14	32.2124	36.6038	34.1564	49.5615	61.5821	45.5455	0.0373238	0.631693	--	--	--	General function prediction only	--
C219123.1	37.2587	8.01934	33.4652	20.1489	5.54691	8.72909	0.0373659	-1.1453	Molecular Function: DNA binding (GO:0003677);; Cellular Component: integral component of membrane (GO:0016021);;	K09422|5.16913e-44|gmx:100780267|K09422 myb proto-oncogene protein, plant | (RefSeq) MYB145; transcription factor MYB59-like	--	Transcription	Transcription factor MYB48 OS=Arabidopsis thaliana OX=3702 GN=MYB48 PE=2 SV=1
C179501.1	15.3305	15.2005	12.5117	8.31494	9.49869	2.90143	0.0375968	-1.02684	--	--	--	--	--
scaffold6004.4	37.8586	17.2656	60.0559	28.2536	17.4189	13.7485	0.0376621	-0.894224	--	--	--	--	F-box protein At2g26850 OS=Arabidopsis thaliana OX=3702 GN=At2g26850 PE=2 SV=1
scaffold3608.47	26.7604	21.7488	20.3012	38.2926	39.6522	29.6021	0.0376667	0.668839	--	K06195|4.64035e-145|sind:105157230|K06195 ApaG protein | (RefSeq) uncharacterized LOC105157230	--	Inorganic ion transport and metabolism	--
scaffold3260.13	20.1847	1.37552	2.58989	2.6793	2.26807	2.13707	0.0379835	-1.51218	Cellular Component: integral component of membrane (GO:0016021);;	--	--	--	--
C219851.7	1.4431	0.548392	1.89333	0.89774	0.233987	0.238852	0.0380856	-1.42807	Cellular Component: membrane (GO:0016020);;	--	--	--	Protein EARLY FLOWERING 4 OS=Arabidopsis thaliana OX=3702 GN=ELF4 PE=1 SV=1
scaffold1350.9	1.87145	0.835646	0.675019	3.82446	1.94921	0.718946	0.0381902	1.24189	--	--	--	--	Putative E3 ubiquitin-protein ligase LIN-1 OS=Lotus japonicus OX=34305 GN=CERBERUS PE=2 SV=2
scaffold5168.12	92.0795	49.8451	94.0251	54.3409	51.5486	31.2776	0.0392569	-0.724038	Molecular Function: DNA binding (GO:0003677);; Molecular Function: transcription factor activity, sequence-specific DNA binding (GO:0003700);; Cellular Component: nucleus (GO:0005634);; Biological Process: regulation of transcription, DNA-templated (GO:0006355);; Biological Process: multicellular organism development (GO:0007275);;	K09284|2.83968e-132|sind:105170679|K09284 AP2-like factor, euAP2 lineage | (RefSeq) ethylene-responsive transcription factor RAP2-7	--	--	Ethylene-responsive transcription factor RAP2-7 OS=Arabidopsis thaliana OX=3702 GN=RAP2-7 PE=2 SV=2
scaffold12750.3	4.00898	3.69518	3.49749	6.55588	7.51833	7.17455	0.0394226	0.947685	--	--	--	--	Dof zinc finger protein DOF1.4 OS=Arabidopsis thaliana OX=3702 GN=DOF1.4 PE=2 SV=1
scaffold2315.1	2.09186	10.4553	2.21061	29.4167	10.7072	3.66863	0.039476	1.55022	Biological Process: fatty acid biosynthetic process (GO:0006633);; Cellular Component: integral component of membrane (GO:0016021);; Molecular Function: transferase activity, transferring acyl groups other than amino-acyl groups (GO:0016747);;	K15397|1.04843e-146|sind:105169646|K15397 3-ketoacyl-CoA synthase [EC:2.3.1.199] | (RefSeq) 3-ketoacyl-CoA synthase 4-like	Fatty acid elongation (ko00062)	--	3-ketoacyl-CoA synthase 4 OS=Arabidopsis thaliana OX=3702 GN=KCS4 PE=2 SV=1
scaffold2997.3	4.81377	8.20266	8.7341	23.4844	11.4269	10.3298	0.0394954	1.07556	--	--	--	--	--
scaffold2153.17	2.72062	4.1711	3.39629	1.53678	1.95001	1.58619	0.0395484	-0.99465	--	--	--	--	--
newGene_3862	19.2418	15.9033	15.085	9.21915	10.5618	9.26369	0.0397619	-0.76537	Cellular Component: integral component of membrane (GO:0016021);;	--	--	General function prediction only	--
scaffold3358.6	13.9293	2.59508	6.54101	1.2381	5.03541	1.02885	0.039963	-1.59378	Cellular Component: chloroplast stroma (GO:0009570);;	--	--	--	--
newGene_7313	2.02964	3.23192	4.9985	6.01545	5.16934	9.69108	0.040115	1.04537	Cellular Component: integral component of membrane (GO:0016021);; Biological Process: transmembrane transport (GO:0055085);;	--	--	Function unknown	Protein PIN-LIKES 5 OS=Arabidopsis thaliana OX=3702 GN=PILS5 PE=2 SV=1
scaffold9540.2	1.95882	0.151165	4.65087	6.77686	4.06701	4.31956	0.0401618	1.48406	--	K15196|3.94764e-59|sind:105162720|K15196 transcription factor IIIB 90 kDa subunit | (RefSeq) transcription factor IIIB 90 kDa subunit	--	Transcription	GDSL esterase/lipase At1g28670 OS=Arabidopsis thaliana OX=3702 GN=At1g28670 PE=2 SV=1
C221139.14	44.4957	64.0201	28.1457	58.3124	90.4344	73.5746	0.0401726	0.749448	Molecular Function: DNA binding (GO:0003677);; Cellular Component: nucleus (GO:0005634);; Biological Process: regulation of transcription, DNA-templated (GO:0006355);;	--	--	--	NAC domain-containing protein 22 OS=Oryza sativa subsp. japonica OX=39947 GN=NAC022 PE=2 SV=1
scaffold576.3	16.5858	9.85391	46.3107	12.622	13.4288	6.93132	0.0403264	-1.00978	--	--	--	--	Growth-regulating factor 2 OS=Arabidopsis thaliana OX=3702 GN=GRF2 PE=1 SV=1
C217933.5	0.203296	0.381935	0.462401	0.623563	0.613228	1.35089	0.0403871	1.31058	--	--	--	--	Protein ECERIFERUM 26-like OS=Arabidopsis thaliana OX=3702 GN=CER26L PE=2 SV=1
scaffold1463.7	20.2198	21.3604	17.2026	12.4822	10.9173	13.2571	0.0403904	-0.66289	--	--	--	General function prediction only	Copper transporter 5 OS=Arabidopsis thaliana OX=3702 GN=COPT5 PE=1 SV=1
newGene_3587	2.12948	1.7652	2.13259	0.543281	1.41036	0.333562	0.0404423	-1.35683	Molecular Function: nucleic acid binding (GO:0003676);; Biological Process: nucleobase-containing compound metabolic process (GO:0006139);; Molecular Function: methyltransferase activity (GO:0008168);; Biological Process: methylation (GO:0032259);;	K15430|3.5389e-40|sind:105169184|K15430 tRNA (guanine10-N2)-methyltransferase [EC:2.1.1.214] | (RefSeq) tRNA (guanine(10)-N2)-methyltransferase homolog	--	Replication, recombination and repair	--
newGene_17425	33.9885	19.9685	36.4933	70.2997	45.8441	35.0143	0.0404575	0.740185	Cellular Component: chloroplast (GO:0009507);; Molecular Function: allene-oxide cyclase activity (GO:0046423);;	K10525|1.37633e-55|nnu:104603032|K10525 allene oxide cyclase [EC:5.3.99.6] | (RefSeq) allene oxide cyclase, chloroplastic-like	alpha-Linolenic acid metabolism (ko00592)	--	Allene oxide cyclase, chloroplastic OS=Oryza sativa subsp. japonica OX=39947 GN=AOC PE=1 SV=1
C214037.3	3.22255	2.77795	1.34024	4.28115	5.04839	5.09812	0.0408607	0.98488	--	--	--	--	Thaumatin-like protein 1 OS=Arabidopsis thaliana OX=3702 GN=TLP1 PE=2 SV=1
scaffold7984.8	2.92482	2.22386	2.48784	4.34126	3.41163	5.08352	0.0412188	0.808476	--	--	--	Intracellular trafficking, secretion, and vesicular transport	Phosphate transporter PHO1 homolog 9 OS=Arabidopsis thaliana OX=3702 GN=PHO1-H9 PE=2 SV=1
C222313.15	47.6931	9.58816	38.4851	22.2492	9.56216	6.2021	0.0412541	-1.27791	Molecular Function: protein dimerization activity (GO:0046983);;	--	--	--	--
scaffold6364.1	4.77204	1.43029	5.47686	2.41886	1.16417	1.37845	0.0412633	-1.17221	Cellular Component: integral component of membrane (GO:0016021);;	--	--	--	PGR5-like protein 1A, chloroplastic OS=Arabidopsis thaliana OX=3702 GN=PGRL1A PE=1 SV=1
scaffold3403.6	6.37386	9.64291	7.275	2.03574	3.0929	5.13035	0.0413333	-1.16474	Molecular Function: iron ion binding (GO:0005506);; Molecular Function: oxidoreductase activity (GO:0016491);; Biological Process: oxidation-reduction process (GO:0055114);;	K04125|3.19793e-53|sind:105175712|K04125 gibberellin 2-oxidase [EC:1.14.11.13] | (RefSeq) gibberellin 2-beta-dioxygenase	Diterpenoid biosynthesis (ko00904)	Secondary metabolites biosynthesis, transport and catabolism;; General function prediction only	Gibberellin 2-beta-dioxygenase OS=Phaseolus coccineus OX=3886 GN=GA2OX1 PE=2 SV=1
scaffold4654.12	2.49046	1.91812	5.65844	0.831841	1.7955	1.4778	0.0414741	-1.23131	Cellular Component: chloroplast (GO:0009507);; Molecular Function: ADP-sugar diphosphatase activity (GO:0019144);;	K18447|5.29267e-140|sind:105164172|K18447 ADP-sugar diphosphatase [EC:3.6.1.21] | (RefSeq) nudix hydrolase 14, chloroplastic	Fructose and mannose metabolism (ko00051);; Purine metabolism (ko00230);; Starch and sucrose metabolism (ko00500)	Replication, recombination and repair	Nudix hydrolase 14, chloroplastic OS=Arabidopsis thaliana OX=3702 GN=NUDT14 PE=1 SV=2
scaffold10771.14	1.00225	4.49597	3.35292	1.08054	1.11667	1.2778	0.0417538	-1.30762	Molecular Function: transcription factor activity, sequence-specific DNA binding (GO:0003700);; Cellular Component: nucleus (GO:0005634);; Biological Process: regulation of transcription, DNA-templated (GO:0006355);; Molecular Function: sequence-specific DNA binding (GO:0043565);;	K09338|1.09877e-43|gmx:100775341|K09338 homeobox-leucine zipper protein | (RefSeq) homeobox-leucine zipper protein HOX3-like	--	Transcription	Homeobox-leucine zipper protein ATHB-17 OS=Arabidopsis thaliana OX=3702 GN=ATHB-17 PE=2 SV=1
scaffold726.5	27.1436	45.1867	32.6495	34.6492	67.9861	72.4038	0.0417702	0.754329	Cellular Component: integral component of membrane (GO:0016021);;	--	--	--	Early light-induced protein 1, chloroplastic OS=Arabidopsis thaliana OX=3702 GN=ELIP1 PE=1 SV=1
scaffold194.27	4.87895	3.77974	6.07981	2.21117	2.06319	4.01197	0.0418546	-0.836315	--	--	--	General function prediction only	Zinc finger CCCH domain-containing protein 12 OS=Arabidopsis thaliana OX=3702 GN=At1g32360 PE=2 SV=1
C221373.6	0.770456	0.655684	1.10895	7.2984	0.382181	0.564599	0.0420817	1.86905	Cellular Component: membrane (GO:0016020);;	--	--	--	Sodium/calcium exchanger NCL2 OS=Oryza sativa subsp. japonica OX=39947 GN=NCL2 PE=2 SV=2
C219903.4	208.276	165.174	293.858	121.436	134.161	165.442	0.0421983	-0.640477	Molecular Function: transporter activity (GO:0005215);; Biological Process: transport (GO:0006810);; Cellular Component: integral component of membrane (GO:0016021);;	K14638|0|sind:105167169|K14638 solute carrier family 15 (peptide/histidine transporter), member 3/4 | (RefSeq) protein NRT1/ PTR FAMILY 7.3-like	--	Amino acid transport and metabolism	Protein NRT1/ PTR FAMILY 7.3 OS=Arabidopsis thaliana OX=3702 GN=NPF7.3 PE=1 SV=2
scaffold10818.14	72.5563	63.6646	50.0121	82.9972	124.567	86.7374	0.0422798	0.681938	Biological Process: cellular process (GO:0009987);; Molecular Function: kinase activity (GO:0016301);;	K07198|1.97468e-47|sind:105163908|K07198 5'-AMP-activated protein kinase, catalytic alpha subunit [EC:2.7.11.11] | (RefSeq) CBL-interacting protein kinase 18	Regulation of autophagy (ko04140)	Signal transduction mechanisms	CBL-interacting protein kinase 2 OS=Oryza sativa subsp. japonica OX=39947 GN=CIPK2 PE=2 SV=1
newGene_9124	4.39975	5.22059	3.98075	1.70917	2.56447	2.22237	0.0425639	-1.04608	Molecular Function: protein dimerization activity (GO:0046983);;	--	--	--	Transcription factor bHLH69 OS=Arabidopsis thaliana OX=3702 GN=BHLH69 PE=2 SV=2
scaffold2526.3	4.38865	7.31466	4.80906	12.1929	7.82465	11.6276	0.0427306	0.949932	Molecular Function: hydrolase activity, hydrolyzing O-glycosyl compounds (GO:0004553);; Cellular Component: cell wall (GO:0005618);; Biological Process: xyloglucan metabolic process (GO:0010411);; Molecular Function: xyloglucan:xyloglucosyl transferase activity (GO:0016762);; Biological Process: cell wall biogenesis (GO:0042546);; Cellular Component: apoplast (GO:0048046);; Biological Process: ce…	K08235|4.02862e-60|sind:105165569|K08235 xyloglucan:xyloglucosyl transferase [EC:2.4.1.207] | (RefSeq) xyloglucan endotransglucosylase/hydrolase protein 24-like	--	--	Xyloglucan endotransglucosylase/hydrolase protein 15 OS=Arabidopsis thaliana OX=3702 GN=XTH15 PE=1 SV=1
scaffold8111.1	3.71484	3.63067	8.63936	2.45132	3.38651	2.43265	0.0427477	-0.951373	--	--	--	--	Growth-regulating factor 4 OS=Arabidopsis thaliana OX=3702 GN=GRF4 PE=1 SV=1
scaffold12672.8	2.60105	4.88244	4.71453	2.01096	2.62848	2.04591	0.0427937	-0.848441	Molecular Function: copper ion binding (GO:0005507);; Molecular Function: primary amine oxidase activity (GO:0008131);; Biological Process: amine metabolic process (GO:0009308);; Molecular Function: quinone binding (GO:0048038);; Biological Process: oxidation-reduction process (GO:0055114);;	K00276|0|sind:105157267|K00276 primary-amine oxidase [EC:1.4.3.21] | (RefSeq) copper amine oxidase 1-like	Glycine, serine and threonine metabolism (ko00260);; Tyrosine metabolism (ko00350);; Phenylalanine metabolism (ko00360);; beta-Alanine metabolism (ko00410);; Isoquinoline alkaloid biosynthesis (ko00950);; Tropane, piperidine and pyridine alkaloid biosynthesis (ko00960)	Secondary metabolites biosynthesis, transport and catabolism	Primary amine oxidase OS=Pisum sativum OX=3888 PE=1 SV=1
scaffold7540.9	10.0812	7.12409	6.68916	17.4637	12.231	14.8645	0.0431967	0.919303	--	K02183|5.87163e-13|sind:105177352|K02183 calmodulin | (RefSeq) probable calcium-binding protein CML45	Phosphatidylinositol signaling system (ko04070);; Plant-pathogen interaction (ko04626)	--	Probable calcium-binding protein CML45 OS=Arabidopsis thaliana OX=3702 GN=CML45 PE=1 SV=1
scaffold12295.1	75.6693	94.597	58.7433	98.0148	126.118	135.236	0.0432461	0.663452	Molecular Function: DNA binding (GO:0003677);; Molecular Function: transcription factor activity, sequence-specific DNA binding (GO:0003700);; Cellular Component: nucleus (GO:0005634);; Biological Process: regulation of transcription, DNA-templated (GO:0006355);;	--	--	--	Ethylene-responsive transcription factor ERF012 OS=Arabidopsis thaliana OX=3702 GN=ERF012 PE=2 SV=1
scaffold6512.8	25.8523	48.2602	19.985	39.2707	63.0839	59.3806	0.0432858	0.785538	Molecular Function: 1-aminocyclopropane-1-carboxylate synthase activity (GO:0016847);; Molecular Function: pyridoxal phosphate binding (GO:0030170);; Biological Process: 1-aminocyclopropane-1-carboxylate biosynthetic process (GO:0042218);;	K20772|0|sind:105158273|K20772 1-aminocyclopropane-1-carboxylate synthase 1/2/6 [EC:4.4.1.14] | (RefSeq) 1-aminocyclopropane-1-carboxylate synthase-like	Cysteine and methionine metabolism (ko00270)	Signal transduction mechanisms	1-aminocyclopropane-1-carboxylate synthase OS=Nicotiana tabacum OX=4097 GN=ACS1 PE=2 SV=1
scaffold2771.10	11.5425	4.32417	14.8586	6.70273	3.24153	3.49227	0.0433138	-1.13916	--	--	--	--	Dirigent protein 19 OS=Arabidopsis thaliana OX=3702 GN=DIR19 PE=2 SV=1
scaffold1269.36	1.39148	0.316091	0.518031	1.8445	1.77506	1.80954	0.0433265	1.27456	Molecular Function: transferase activity (GO:0016740);;	--	--	--	Vinorine synthase OS=Rauvolfia serpentina OX=4060 GN=ACT PE=1 SV=2
scaffold5383.11	32.7512	1.11664	15.7555	9.58826	3.16104	0.623795	0.0434117	-1.84364	Molecular Function: hydrolase activity, hydrolyzing O-glycosyl compounds (GO:0004553);; Cellular Component: cell wall (GO:0005618);; Biological Process: xyloglucan metabolic process (GO:0010411);; Molecular Function: xyloglucan:xyloglucosyl transferase activity (GO:0016762);; Biological Process: cell wall biogenesis (GO:0042546);; Cellular Component: apoplast (GO:0048046);; Biological Process: ce…	K08235|6.37786e-112|sind:105177854|K08235 xyloglucan:xyloglucosyl transferase [EC:2.4.1.207] | (RefSeq) probable xyloglucan endotransglucosylase/hydrolase protein 7	--	--	Probable xyloglucan endotransglucosylase/hydrolase protein 7 OS=Arabidopsis thaliana OX=3702 GN=XTH7 PE=2 SV=2
C202493.1	0.518077	0.342691	0.491005	2.77096	1.61518	0.06842	0.0436578	1.72914	Cellular Component: vacuole (GO:0005773);; Cellular Component: chloroplast (GO:0009507);; Cellular Component: integral component of membrane (GO:0016021);; Cellular Component: intracellular organelle part (GO:0044446);;	--	--	General function prediction only	CSC1-like protein ERD4 OS=Arabidopsis thaliana OX=3702 GN=ERD4 PE=2 SV=1
scaffold1974.1	2.22356	1.44507	0.750221	4.0221	3.32847	3.2386	0.043791	1.15155	Molecular Function: phosphopantothenoylcysteine decarboxylase activity (GO:0004633);;	K01598|6.32088e-117|sind:105176139|K01598 phosphopantothenoylcysteine decarboxylase [EC:4.1.1.36] | (RefSeq) probable phosphopantothenoylcysteine decarboxylase	Pantothenate and CoA biosynthesis (ko00770)	Inorganic ion transport and metabolism;; Cell cycle control, cell division, chromosome partitioning	Phosphopantothenoylcysteine decarboxylase OS=Arabidopsis thaliana OX=3702 GN=HAL3A PE=1 SV=1
C219605.8	20.1329	20.0057	23.2176	13.1148	11.0958	14.1562	0.0438955	-0.670925	Cellular Component: nucleus (GO:0005634);; Cellular Component: cytoplasm (GO:0005737);;	--	--	Function unknown	U-box domain-containing protein 38 OS=Arabidopsis thaliana OX=3702 GN=PUB38 PE=1 SV=1
scaffold3478.30	5.0371	7.9001	3.40136	3.80855	3.80917	2.16639	0.0439909	-1.13194	Molecular Function: kinase activity (GO:0016301);;	--	--	--	Tyrosine-sulfated glycopeptide receptor 1 OS=Arabidopsis thaliana OX=3702 GN=PSY1R PE=1 SV=1
C221605.9	5.37208	4.79859	6.75117	3.9983	2.25232	2.68056	0.044255	-0.834032	Biological Process: carbohydrate metabolic process (GO:0005975);; Molecular Function: hydrolase activity, acting on glycosyl bonds (GO:0016798);;	--	--	--	Inactive beta-amylase 9 OS=Arabidopsis thaliana OX=3702 GN=BAM9 PE=2 SV=1
scaffold6334.27	12.3584	16.7511	13.3999	10.6751	3.65937	8.75671	0.0443997	-0.852435	--	--	--	--	F-box/FBD/LRR-repeat protein At1g13570 OS=Arabidopsis thaliana OX=3702 GN=At1g13570 PE=2 SV=1
scaffold174.9	51.9824	62.3061	40.1125	33.7075	28.2341	33.6655	0.0446358	-0.677609	--	--	--	--	--
newGene_20263	3.40266	1.15533	4.72134	0.264546	1.81917	0	0.0446906	-2.06344	Cellular Component: nucleosome (GO:0000786);; Molecular Function: DNA binding (GO:0003677);; Cellular Component: nucleus (GO:0005634);; Molecular Function: protein heterodimerization activity (GO:0046982);;	K11252|2.10796e-61|gmx:100789702|K11252 histone H2B | (RefSeq) histone H2B.3	--	Chromatin structure and dynamics	Histone H2B.3 (Fragment) OS=Solanum lycopersicum OX=4081 GN=H2B-3 PE=2 SV=1
scaffold12625.23	10.0643	0.502393	0.586511	0.251806	0.549052	1.89282	0.0446923	-2.02597	--	--	--	--	Protein SRC2 OS=Glycine max OX=3847 GN=SRC2 PE=2 SV=1
newGene_12423	0.063169	0.089091	1.05773	1.63382	1.82181	0.412685	0.0448211	1.78677	Biological Process: regulation of monopolar cell growth (GO:0051513);;	--	--	--	Protein LONGIFOLIA 1 OS=Arabidopsis thaliana OX=3702 GN=LNG1 PE=1 SV=1
newGene_8684	100.004	29.7503	76.7627	44.9725	43.2814	30.2926	0.0449035	-0.798504	Molecular Function: oxidoreductase activity (GO:0016491);; Molecular Function: metal ion binding (GO:0046872);; Biological Process: oxidation-reduction process (GO:0055114);;	--	--	Secondary metabolites biosynthesis, transport and catabolism;; General function prediction only	1-aminocyclopropane-1-carboxylate oxidase homolog 1 OS=Arabidopsis thaliana OX=3702 GN=At1g06620 PE=2 SV=1
newGene_18082	0.001249	0.7894	0.090918	2.07527	2.26926	0.095602	0.044909	2.22556	Molecular Function: protein C-terminal S-isoprenylcysteine carboxyl O-methyltransferase activity (GO:0004671);; Cellular Component: endoplasmic reticulum membrane (GO:0005789);; Biological Process: C-terminal protein methylation (GO:0006481);; Cellular Component: integral component of membrane (GO:0016021);;	K00587|4.2626e-97|sind:105168244|K00587 protein-S-isoprenylcysteine O-methyltransferase [EC:2.1.1.100] | (RefSeq) protein-S-isoprenylcysteine O-methyltransferase A	Terpenoid backbone biosynthesis (ko00900)	Posttranslational modification, protein turnover, chaperones	Protein-S-isoprenylcysteine O-methyltransferase B OS=Arabidopsis thaliana OX=3702 GN=ICMTB PE=1 SV=1
scaffold3276.1	1.89243	1.57357	2.51709	12.7224	1.25145	1.63314	0.0449165	1.41346	--	--	--	Signal transduction mechanisms	BTB/POZ domain-containing protein At2g46260 OS=Arabidopsis thaliana OX=3702 GN=At2g46260 PE=1 SV=2
C203057.1	1.64556	0.993827	3.41814	0.501199	0.877233	0.972371	0.0449916	-1.30765	Biological Process: metabolic process (GO:0008152);; Molecular Function: hydrolase activity (GO:0016787);;	--	--	Defense mechanisms	Probable carboxylesterase 9 OS=Arabidopsis thaliana OX=3702 GN=CXE9 PE=2 SV=1
newGene_7691	100.15	71.8538	84.232	60.4448	59.8691	40.357	0.0452089	-0.643395	Molecular Function: nucleic acid binding (GO:0003676);; Biological Process: carbohydrate transport (GO:0008643);; Cellular Component: integral component of membrane (GO:0016021);;	K15382|3.47511e-93|sind:105172394|K15382 solute carrier family 50 (sugar transporter) | (RefSeq) bidirectional sugar transporter SWEET17-like	--	General function prediction only	Bidirectional sugar transporter SWEET17 OS=Arabidopsis thaliana OX=3702 GN=SWEET17 PE=1 SV=2
scaffold696.10	12.3716	26.9212	10.9991	10.6155	53.3204	42.0077	0.0452464	1.07351	Molecular Function: DNA binding (GO:0003677);; Biological Process: response to salt stress (GO:0009651);; Biological Process: response to ethylene (GO:0009723);; Biological Process: response to auxin (GO:0009733);; Biological Process: response to salicylic acid (GO:0009751);; Biological Process: response to jasmonic acid (GO:0009753);; Biological Process: cellular process (GO:0009987);;	K09422|1.75331e-81|sind:105163413|K09422 myb proto-oncogene protein, plant | (RefSeq) myb-related protein Myb4-like	--	Transcription	Transcription factor MYB14 OS=Arabidopsis thaliana OX=3702 GN=MYB14 PE=2 SV=1
scaffold5905.6	19.8355	24.3306	18.1628	31.6039	31.6244	33.3377	0.0453254	0.642943	Molecular Function: oxidoreductase activity (GO:0016491);; Biological Process: oxidation-reduction process (GO:0055114);;	--	--	General function prediction only	NADPH-dependent aldo-keto reductase, chloroplastic OS=Arabidopsis thaliana OX=3702 GN=AKR4C9 PE=1 SV=1
scaffold9919.1	27.0575	25.5007	18.2608	41.6023	38.7364	31.1427	0.0455786	0.664006	--	--	--	--	Alpha-soluble NSF attachment protein OS=Solanum tuberosum OX=4113 PE=2 SV=1
scaffold9154.2	68.1466	50.7186	41.0193	75.7008	93.9392	77.0822	0.0455952	0.647388	--	--	--	--	Late embryogenesis abundant protein At1g64065 OS=Arabidopsis thaliana OX=3702 GN=At1g64065 PE=2 SV=1
C219717.5	11.6172	10.5084	10.1978	13.6016	19.3202	19.0543	0.0457847	0.709524	Molecular Function: DNA binding (GO:0003677);;	--	--	Transcription	Transcription factor MYB73 OS=Arabidopsis thaliana OX=3702 GN=MYB73 PE=1 SV=1
scaffold9243.28	32.5099	76.4501	23.8729	28.2763	14.626	28.9067	0.0458784	-0.894948	Molecular Function: asparagine synthase (glutamine-hydrolyzing) activity (GO:0004066);; Cellular Component: cytosol (GO:0005829);; Biological Process: asparagine biosynthetic process (GO:0006529);; Biological Process: glutamine metabolic process (GO:0006541);; Biological Process: response to absence of light (GO:0009646);; Molecular Function: protein homodimerization activity (GO:0042803);;	K01953|0|sind:105163945|K01953 asparagine synthase (glutamine-hydrolysing) [EC:6.3.5.4] | (RefSeq) asparagine synthetase [glutamine-hydrolyzing]	Alanine, aspartate and glutamate metabolism (ko00250)	Amino acid transport and metabolism	Asparagine synthetase [glutamine-hydrolyzing] OS=Triphysaria versicolor OX=64093 GN=AS PE=2 SV=3
scaffold2979.18	0.626775	6.70191	2.20598	3.80754	1.32857	31.8546	0.0458875	1.92675	Biological Process: lipid transport (GO:0006869);; Molecular Function: lipid binding (GO:0008289);;	--	--	--	Non-specific lipid-transfer protein 2 OS=Solanum chilense OX=4083 PE=3 SV=1
newGene_11596	161.083	17.1715	61.0243	45.3834	33.6521	25.4131	0.045943	-1.11245	Biological Process: defense response (GO:0006952);;	--	--	--	Thionin OS=Brassica rapa subsp. pekinensis OX=51351 GN=THI2 PE=2 SV=1
scaffold5079.13	1.64715	0.993817	2.4981	0.799874	0.740337	0.52356	0.0460963	-1.2361	--	--	--	Signal transduction mechanisms	Apoptosis inhibitor 5-like protein API5 OS=Oryza sativa subsp. japonica OX=39947 GN=API5 PE=1 SV=1
scaffold4780.1	30.1116	96.0661	34.5138	39.6777	143.821	151.212	0.0465905	1.05723	--	--	--	--	Stellacyanin OS=Toxicodendron vernicifluum OX=4013 PE=1 SV=1
scaffold4180.9	9.5977	12.6199	12.2053	21.7405	18.0382	13.7455	0.0468095	0.670072	Cellular Component: extracellular region (GO:0005576);; Cellular Component: cell wall (GO:0005618);; Cellular Component: integral component of membrane (GO:0016021);; Molecular Function: pectinesterase activity (GO:0030599);; Biological Process: cell wall modification (GO:0042545);; Biological Process: negative regulation of catalytic activity (GO:0043086);; Molecular Function: aspartyl esterase …	K01051|6.85226e-141|pop:POPTR_0214s00200g|K01051 pectinesterase [EC:3.1.1.11] | (RefSeq) hypothetical protein	Pentose and glucuronate interconversions (ko00040);; Starch and sucrose metabolism (ko00500)	--	Pectinesterase 3 OS=Citrus sinensis OX=2711 PE=1 SV=1
scaffold7432.4	0.404409	2.18883	0.869484	0.53801	0.625271	12.4337	0.0468193	1.95278	Cellular Component: membrane (GO:0016020);; Molecular Function: oxidoreductase activity (GO:0016491);; Molecular Function: metal ion binding (GO:0046872);;	K20562|0|sind:105171249|K20562 biphenyl-4-hydroxylase | (RefSeq) cytochrome P450 CYP736A12-like	--	Secondary metabolites biosynthesis, transport and catabolism	Cytochrome P450 CYP736A12 OS=Panax ginseng OX=4054 PE=2 SV=1
scaffold11703.7	4.20588	18.6538	8.025	13.6365	17.5424	33.0743	0.0469566	1.0525	Molecular Function: hydrolase activity, hydrolyzing O-glycosyl compounds (GO:0004553);; Cellular Component: cell wall (GO:0005618);; Biological Process: xyloglucan metabolic process (GO:0010411);; Molecular Function: xyloglucan:xyloglucosyl transferase activity (GO:0016762);; Biological Process: cell wall biogenesis (GO:0042546);; Cellular Component: apoplast (GO:0048046);; Biological Process: ce…	K08235|5.23119e-68|sind:105165572|K08235 xyloglucan:xyloglucosyl transferase [EC:2.4.1.207] | (RefSeq) probable xyloglucan endotransglucosylase/hydrolase protein 23	--	--	Probable xyloglucan endotransglucosylase/hydrolase protein 16 OS=Arabidopsis thaliana OX=3702 GN=XTH16 PE=2 SV=2
scaffold12532.1	1.01697	0.641987	1.7604	0.613332	0.488021	0.159588	0.04724	-1.34535	Molecular Function: oxidoreductase activity (GO:0016491);; Biological Process: oxidation-reduction process (GO:0055114);;	--	--	--	--
scaffold4614.7	35.3037	23.6014	69.093	26.2222	25.1965	22.0413	0.0472524	-0.744516	Molecular Function: transferase activity, transferring glycosyl groups (GO:0016757);;	K06617|0|sind:105166452|K06617 raffinose synthase [EC:2.4.1.82] | (RefSeq) probable galactinol--sucrose galactosyltransferase 6	Galactose metabolism (ko00052)	--	Probable galactinol--sucrose galactosyltransferase 6 OS=Arabidopsis thaliana OX=3702 GN=RFS6 PE=2 SV=2
scaffold2900.6	12.7205	9.68785	20.2408	7.91978	6.65434	8.97569	0.0474326	-0.798024	--	--	--	Posttranslational modification, protein turnover, chaperones	Chaperone protein dnaJ 20, chloroplastic OS=Arabidopsis thaliana OX=3702 GN=ATJ20 PE=1 SV=2
scaffold3515.14	7.90166	1.81298	6.77186	26.1539	13.6784	2.39966	0.0474917	1.40088	--	--	--	--	Kirola OS=Actinidia deliciosa OX=3627 PE=1 SV=1
scaffold7770.17	0.667969	2.16482	0.599476	3.14455	2.66006	2.31493	0.0475411	1.23531	--	--	--	Signal transduction mechanisms;; Cytoskeleton	--
scaffold12772.5	49.2395	37.7148	48.4264	41.0526	19.004	19.6362	0.0477575	-0.734999	--	--	--	Chromatin structure and dynamics;; Transcription	--
scaffold11316.3	8.31961	2.29254	7.29458	0.402443	3.2138	3.5305	0.0482646	-1.26345	Molecular Function: protein kinase activity (GO:0004672);; Molecular Function: ATP binding (GO:0005524);; Biological Process: protein phosphorylation (GO:0006468);; Cellular Component: integral component of membrane (GO:0016021);;	--	--	--	Leucine-rich repeat receptor-like serine/threonine-protein kinase BAM1 OS=Arabidopsis thaliana OX=3702 GN=BAM1 PE=1 SV=1
scaffold6865.1	11.2701	3.27685	12.7729	5.52923	3.55971	3.42918	0.0483022	-1.07199	Cellular Component: integral component of membrane (GO:0016021);;	--	--	--	Tetraspanin-6 OS=Arabidopsis thaliana OX=3702 GN=TET6 PE=2 SV=1
scaffold6737.7	120.176	195.52	85.3282	166.305	239.494	267.606	0.0484636	0.743628	Molecular Function: hydrolase activity, hydrolyzing O-glycosyl compounds (GO:0004553);; Cellular Component: cell wall (GO:0005618);; Biological Process: xyloglucan metabolic process (GO:0010411);; Molecular Function: xyloglucan:xyloglucosyl transferase activity (GO:0016762);; Biological Process: cell wall biogenesis (GO:0042546);; Cellular Component: apoplast (GO:0048046);; Biological Process: ce…	K08235|1.53823e-122|sind:105165569|K08235 xyloglucan:xyloglucosyl transferase [EC:2.4.1.207] | (RefSeq) xyloglucan endotransglucosylase/hydrolase protein 24-like	--	--	Xyloglucan endotransglucosylase/hydrolase protein 15 OS=Arabidopsis thaliana OX=3702 GN=XTH15 PE=1 SV=1
scaffold8091.1	8.28375	3.14683	5.45811	3.89042	1.14677	0.15152	0.0485091	-1.63808	--	--	--	--	--
scaffold6838.11	36.4782	47.6555	33.4284	57.2879	59.1095	60.6425	0.0487021	0.621032	Molecular Function: ubiquitin-protein transferase activity (GO:0004842);; Cellular Component: nucleus (GO:0005634);; Cellular Component: cytoplasm (GO:0005737);; Biological Process: protein ubiquitination (GO:0016567);;	--	--	Function unknown	U-box domain-containing protein 9 OS=Arabidopsis thaliana OX=3702 GN=PUB9 PE=1 SV=1
newGene_21258	23.3185	16.3835	21.4395	39.6871	19.1031	39.6849	0.0494161	0.708178	Biological Process: transcription, DNA-templated (GO:0006351);;	--	--	--	Myb family transcription factor PHL5 OS=Arabidopsis thaliana OX=3702 GN=PHL5 PE=2 SV=1
scaffold12766.3	1.14137	0.894243	1.77587	4.25291	4.42368	0.606577	0.0497174	1.31546	Molecular Function: hydrolase activity, hydrolyzing O-glycosyl compounds (GO:0004553);; Cellular Component: cell wall (GO:0005618);; Biological Process: cellular glucan metabolic process (GO:0006073);; Molecular Function: xyloglucan:xyloglucosyl transferase activity (GO:0016762);; Cellular Component: apoplast (GO:0048046);; Biological Process: cell wall organization (GO:0071555);;	K08235|1.2273e-113|sind:105174258|K08235 xyloglucan:xyloglucosyl transferase [EC:2.4.1.207] | (RefSeq) probable xyloglucan endotransglucosylase/hydrolase protein 32	--	--	Probable xyloglucan endotransglucosylase/hydrolase protein 32 OS=Arabidopsis thaliana OX=3702 GN=XTH32 PE=2 SV=1
newGene_14821	16.3784	19.9383	24.9192	24.4199	19.052	62.5577	0.0498502	0.831871	--	--	--	--	--
scaffold2864.1	203.167	312.4	146.635	283.576	420.709	369.745	0.0499217	0.705583	Cellular Component: membrane (GO:0016020);;	--	--	--	--

## Sheet: Supplementary Table 3
Supplementary Table 3. Correlation analysis between significantly changed transcription factors and enzymes related to salvianolic acid (SalA) biosynthesis. The correlation was calculated based on gene expression value using SPSS software with two-tailed test.
Gene ID	Description	Abbrevation	Correlation coefficient
			Laccase 7 (Gene1)	Laccase 13 (Gene2)	Laccase 20 (Gene3)	Rosmarinate synthase (Gene4)
scaffold1005.5	Zinc finger protein ZAT10	TF1	0.431	0.137	0.912*	0.257
scaffold9614.5	Zinc finger CCCH domain-containing protein 33	TF2	0.923**	0.505	0.422	0.817*
scaffold9614.6	Zinc finger CCCH domain-containing protein 29	TF3	0.876*	0.299	0.503	0.669
newGene_9684	Zinc finger A20 and AN1 domain-containing stress-associated protein 5	TF4	0.968**	0.627	0.719	0.767
C219717.5	Transcription factor MYB73	TF5	0.831*	0.487	0.636	0.691
scaffold1723.6	Transcription factor MYB33	TF6	0.605	0.917**	0.373	0.825*
scaffold696.10	Transcription factor MYB14	TF7	0.732	0.022	0.313	0.336
newGene_21258	Myb family transcription factor PHL5	TF8	0.445	0.728	0.865*	0.678
scaffold7135.8	Ethylene-responsive transcription factor ERF012	TF9	0.848*	0.126	0.713	0.496
scaffold12295.1	Ethylene-responsive transcription factor ERF012	TF10	0.932**	0.322	0.663	0.705
scaffold10670.14	Ethylene-responsive transcription factor 5	TF11	0.836*	0.311	0.829*	0.654
C221651.2	bZIP transcription factor 18	TF12	0.857*	0.714	0.874*	0.757

## Sheet: Supplementary Table 4
Supplementary Table 4. Gene-specific primers used in the reverse transcription-quantitative PCR (RT-qPCR) analysis. The Primer3 Plus web interface (http://frodo.wi.mit.edu) was used to design the primers. Primer specificity was assessed by BLASTN search against the genome sequence of S. miltiorrhiza.
Gene ID	Gene or primer name	Forward primer (5'->3')	Reverse primer (5'->3')
DQ243702	Actin	AGGAACCACCGATCCAGACA	GGTGCCCTGAGGTCCTGTT
scaffold9670.3	Laccase 20	AACTTCAACCCGAGCAGAGA	AACACGGCGGTAGATCAGAC
scaffold9243.42	Laccase 13	CATGAGTTCGTGGTCGAAGA	CCATCGCTAAACCCCAAGTA
scaffold215.22	Laccase 7	AACTTGACCGGTTTGACCAG	ATATCCCGCTCACGTTGTTC
